# Supplementary material for: A Small Molecule Antagonist of PD-1/PD-L1 Interactions Acts as an Immune Checkpoint Inhibitor for NSCLC and Melanoma Immunotherapy
Source: Front Immunol. 2021 May 14;12:654463. doi: 10.3389/fimmu.2021.654463 (PMC8160380; doi:10.3389/fimmu.2021.654463)
Supplement: Supplementary file 9 [file DataSheet_1.xlsx]

## Sheet: Figure1
Fifure1 C
	0.01	3.8768	3.8774	3.8221
	0.02	3.8689	3.8729	3.8185
	0.039	3.8596	3.8897	3.7586
	0.078	3.8009	3.8915	3.7285
	0.15625	3.6029	3.7778	3.6703
	0.3125	3.5541	3.556	3.4443
	0.625	3.6733	3.5296	3.4282
	1.25	3.1046	3.1963	3.1466
	2.5	2.2794	2.888	2.6836
	5	1.9732	2.2766	2.0212
	10	1.4938	1.5666	1.5265
	20	0.9495	1.0624	0.9857
	40	0.7604	0.8563	0.8628
Fifure1 D	hPD1								mPD1								hPD-L1							mPD-L1
	Time (s)	0.2nM	1nM	5nM	25nM	125nM			Time (s)	0.2nM	1nM	5nM	25nM	125nM			Time (s)	0.2nM	1nM	25nM	125nM			Time (s)	0.2nM	1nM	5nM	25nM	125nM
	0.539997	-0.74219	-1.10303	0.055664	0.976074	2.4502			0.240002	4.18457	4.57129	5.72363	6.90234	7.47363										0.84	1.63232	3.42969	3.70117	7.86572	13.0098
	0.740002	-0.58008	-0.65576	0.289063	1.2627	2.92676			0.640003	4.18652	4.55957	5.31738	7.02051	7.46973			-60.06	-0.40137	-0.17627	-0.60693	-0.76856			0.939999	1.84717	3.1958	3.82959	7.29248	12.3091
	0.84	-0.45801	-0.51807	0.500488	1.26172	3.21826			0.84	4.33398	5.0791	5.2334	6.96582	7.67285			-59.96	-0.39551	-0.1665	-0.59131	-0.75879			1.04	1.58789	2.80957	3.36865	6.40186	11.5513
	1.04	-0.42676	-0.52344	0.319824	1.32227	3.271			1.04	4.51759	5.28224	5.53712	6.85938	7.74611			-59.86	-0.39551	-0.17236	-0.60303	-0.75879			1.14	1.58634	2.33292	3.41398	5.71622	11.1283
	2.14	-0.28613	-0.54932	0.602051	1.35645	4.0459			1.14	4.58984	5.37695	5.46289	6.85938	8.03711			-59.76	-0.40723	-0.18311	-0.59912	-0.76074			1.24	1.521	2.17139	3.33643	5.33398	10.5728
	2.34	-0.23486	-0.52539	0.647461	1.35498	4.00586			1.84	4.50293	5.2793	5.29395	6.83008	7.80078			-59.66	-0.40137	-0.18018	-0.58936	-0.75488			1.34	1.28027	1.72314	3.00684	4.81982	10.0195
	2.44	-0.23438	-0.5083	0.62207	1.35938	3.99268			1.94	4.56543	5.34668	5.43457	6.65137	7.89063			-59.56	-0.39356	-0.1665	-0.58936	-0.74707			1.44	1.13086	1.62695	2.96973	4.57422	9.86182
	2.64	-0.2666	-0.46729	0.60791	1.38574	3.9917			2.04	4.60155	5.33202	5.53416	6.76758	7.91795			-59.46	-0.39746	-0.17432	-0.58936	-0.73926			1.54	1.05713	1.47607	2.90576	4.41895	9.68799
	2.74	-0.22949	-0.44385	0.653809	1.41895	4.03662			2.14	4.63574	5.27344	5.59668	6.77148	7.99512			-59.36	-0.40137	-0.18994	-0.59912	-0.75293			1.74	1.29688	1.53125	3.28369	4.43408	9.58398
	2.84	-0.24805	-0.47607	0.672363	1.43945	4.03564			2.24	4.63867	5.25684	5.60938	6.7627	8.01465			-59.26	-0.39746	-0.1919	-0.59326	-0.75879			1.84	1.27002	1.37988	3.14355	4.28467	9.38965
	2.94	-0.23633	-0.47412	0.682129	1.43359	4.04541			2.34	4.65137	5.2207	5.56738	6.77832	8.00488			-59.16	-0.38379	-0.19385	-0.59522	-0.74902			1.94	1.27783	1.31738	3.11719	4.2998	9.36816
	3.04	-0.20313	-0.42236	0.711426	1.4707	4.06494			2.44	4.69434	5.21582	5.58398	6.80957	7.98047			-59.06	-0.37012	-0.18213	-0.58154	-0.74316			2.04	1.14893	1.18652	3.07324	4.1333	9.21484
	3.24	-0.20703	-0.41065	0.708496	1.47656	4.11182			2.54	4.7578	5.24316	5.6162	6.83594	7.99023			-58.96	-0.38672	-0.18799	-0.5835	-0.74512			2.14	1.07714	1.12548	2.98876	3.96874	9.15771
	3.34	-0.2207	-0.40674	0.693848	1.4707	4.13232			2.64	4.75195	5.24512	5.61719	6.89551	7.98535			-58.86	-0.39746	-0.18799	-0.5874	-0.75391			2.24	1.08936	1.04541	2.95947	3.84863	9.11377
	3.44	-0.19434	-0.40186	0.724121	1.4873	4.14893			2.74	4.74805	5.2627	5.62109	6.89648	7.99805			-58.76	-0.3877	-0.18799	-0.58154	-0.75098			2.34	1.06201	0.975586	2.9502	3.71191	9.09277
	3.64	-0.20703	-0.39209	0.737793	1.49805	4.20557			2.84	4.72949	5.28418	5.58789	6.91016	7.99316			-58.66	-0.3877	-0.1919	-0.5874	-0.75098			2.44	0.988281	0.925293	2.8916	3.60791	9.01172
	3.74	-0.20508	-0.39502	0.725098	1.49316	4.20264			3.04	4.71093	5.29687	5.58105	6.91309	8.00586			-58.56	-0.39746	-0.18408	-0.59326	-0.75098			2.54	0.877441	0.847656	2.82715	3.53857	8.90088
	3.84	-0.20606	-0.39795	0.703613	1.50195	4.21826			3.14	4.72656	5.30176	5.56348	6.96289	8.01367			-58.46	-0.3877	-0.17822	-0.5874	-0.75098			2.64	0.870597	0.872062	2.79589	3.54443	8.86425
	3.94	-0.22168	-0.42432	0.691895	1.50488	4.20654			3.24	4.7207	5.31055	5.56445	6.98047	8.01172			-58.36	-0.38184	-0.17822	-0.57764	-0.73926			2.74	0.936035	0.935547	2.79785	3.58154	8.89063
	4.24	-0.22754	-0.40479	0.686035	1.50879	4.23389			4.34	4.71875	5.28613	5.64453	6.98828	8.06641			-58.26	-0.38379	-0.17432	-0.58545	-0.73145			2.94	1.00928	0.922852	2.78174	3.62012	8.896
	4.44	-0.20996	-0.37549	0.693848	1.5166	4.25537			4.44	4.71484	5.27344	5.63281	6.98828	8.0625			-58.16	-0.39356	-0.17822	-0.5835	-0.73145			3.04	0.983398	0.943848	2.75293	3.58691	8.83105
	4.54	-0.19336	-0.36377	0.695801	1.52832	4.26123			4.54	4.71289	5.2666	5.64648	6.98828	8.06054			-58.06	-0.41895	-0.20166	-0.59912	-0.74512			4.04	1.01904	1.00488	2.7627	3.50537	8.7998
	4.64	-0.17969	-0.36377	0.70459	1.54883	4.27686			4.64	4.72656	5.2627	5.6543	7	8.0625			-57.96	-0.42285	-0.21338	-0.60303	-0.74707			4.14	1.01611	1.00293	2.78906	3.50048	8.79882
	4.74	-0.19238	-0.3794	0.70166	1.54004	4.26709			4.74	4.7207	5.26465	5.65625	7.00391	8.04492			-57.86	-0.41699	-0.21143	-0.57764	-0.74121			4.24	1.0249	0.977539	2.78418	3.47998	8.78125
	4.84	-0.18848	-0.35596	0.711426	1.54883	4.28467			4.84	4.72461	5.26074	5.64844	6.98828	8.04492			-57.76	-0.41699	-0.21338	-0.57373	-0.72559			4.44	1.0415	0.962891	2.80566	3.50342	8.7666
	4.94	-0.17871	-0.34619	0.725098	1.55176	4.29053			4.94	4.70508	5.24707	5.625	6.97656	8.03125			-57.66	-0.42871	-0.23193	-0.56982	-0.73145			4.54	1.03955	0.949219	2.80371	3.48389	8.75293
	5.04	-0.17285	-0.33447	0.727051	1.55371	4.30029			5.04	4.71093	5.25097	5.63671	6.9707	8.03711			-57.56	-0.4082	-0.24561	-0.55518	-0.7207			4.64	1.03857	0.940428	2.79394	3.47607	8.72363
	5.24	-0.18262	-0.34619	0.715332	1.55176	4.29443			5.14	4.72266	5.26855	5.64844	6.97461	8.04883			-57.46	-0.40723	-0.24268	-0.54834	-0.73145			4.74	1.01904	0.926758	2.78809	3.47021	8.7041
	5.34	-0.17871	-0.34033	0.725098	1.55762	4.30029			5.24	4.72656	5.26855	5.64844	6.98047	8.05273			-57.36	-0.40332	-0.24854	-0.54248	-0.75			4.84	0.997559	0.905273	2.76465	3.47412	8.68848
	5.44	-0.17285	-0.34424	0.717285	1.55762	4.3042			5.34	4.75	5.27832	5.6582	6.97266	8.06836			-57.26	-0.3916	-0.23682	-0.5376	-0.73535			4.94	0.987793	0.893555	2.73828	3.47217	8.67285
	5.54	-0.17481	-0.34619	0.715332	1.56152	4.31396			5.44	4.76172	5.27832	5.68164	6.9707	8.07227			-57.16	-0.37793	-0.229	-0.55811	-0.72559			5.14	0.985837	0.902341	2.73047	3.48974	8.67187
	5.64	-0.17383	-0.34033	0.721191	1.57129	4.31982			5.54	4.75781	5.28711	5.68359	6.9707	8.08203			-57.06	-0.37695	-0.23877	-0.55811	-0.73145			5.24	0.987793	0.90332	2.72852	3.48779	8.66797
	5.74	-0.16504	-0.33643	0.729004	1.58105	4.3335			5.64	4.75977	5.28418	5.67383	6.97852	8.08789			-56.96	-0.37793	-0.23877	-0.54834	-0.71973			5.34	0.981934	0.898438	2.72168	3.50244	8.65527
	6.04	-0.14746	-0.31885	0.73877	1.58887	4.35107			5.74	4.77148	5.28613	5.67578	6.98047	8.09961			-56.86	-0.37793	-0.23877	-0.55225	-0.72363			5.44	0.964355	0.876953	2.70801	3.49658	8.64844
	6.14	-0.15137	-0.31885	0.727051	1.58887	4.35498			5.84	4.77148	5.29004	5.67969	6.98828	8.10547			-56.76	-0.37988	-0.24268	-0.56397	-0.73145			5.64	0.947751	0.852536	2.70019	3.45654	8.64941
	6.24	-0.15527	-0.31104	0.729004	1.58496	4.35693			5.94	4.77148	5.29395	5.69727	6.99219	8.11328			-56.66	-0.37988	-0.23877	-0.56006	-0.72559			5.74	0.927246	0.829102	2.6875	3.43896	8.63184
	6.34	-0.16309	-0.31299	0.727051	1.58301	4.35498			6.04	4.76367	5.29199	5.68555	6.99219	8.11914			-56.56	-0.38379	-0.24854	-0.56397	-0.73145			5.84	0.928223	0.84668	2.68555	3.43701	8.62598
	6.44	-0.16113	-0.29736	0.73291	1.58887	4.37061			6.14	4.76172	5.27832	5.68555	6.99609	8.11719			-56.46	-0.40527	-0.2583	-0.57568	-0.74121			5.94	0.912598	0.852539	2.68066	3.43701	8.62598
	6.54	-0.15723	-0.29736	0.736816	1.58887	4.36084			6.24	4.77344	5.29785	5.70508	6.99414	8.125			-56.36	-0.38477	-0.25342	-0.54736	-0.72656			6.04	0.921387	0.852539	2.69141	3.43311	8.62207
	6.64	-0.16113	-0.29736	0.742676	1.58887	4.36084			6.34	4.79102	5.30176	5.70215	7.00391	8.12207			-56.26	-0.38281	-0.25147	-0.55127	-0.72461			6.14	0.900877	0.843749	2.67578	3.42724	8.60644
	6.74	-0.16699	-0.29736	0.742676	1.58887	4.37061			6.44	4.81445	5.31543	5.70898	7.00586	8.14063			-56.16	-0.39941	-0.26807	-0.57666	-0.75488			6.24	0.905762	0.839844	2.66309	3.40967	8.59277
	6.84	-0.15723	-0.2876	0.742676	1.58887	4.37061			6.64	4.82813	5.31543	5.70898	7.03125	8.13477			-56.06	-0.4082	-0.27295	-0.57861	-0.75977			6.34	0.915527	0.827148	2.66016	3.40186	8.57715
	6.94	-0.15332	-0.29346	0.746582	1.59277	4.37451			6.74	4.82227	5.30957	5.7207	7.02734	8.13281			-55.96	-0.40723	-0.27002	-0.57178	-0.75684			6.44	0.905762	0.824219	2.66406	3.41162	8.57129
	7.04	-0.15137	-0.2915	0.742676	1.59863	4.38037			6.84	4.83008	5.32129	5.7168	7.0332	8.13867			-55.86	-0.40723	-0.2876	-0.57764	-0.75293			6.54	0.901855	0.828125	2.66699	3.41748	8.56152
	7.14	-0.14746	-0.28369	0.752441	1.6084	4.39014			6.94	4.83887	5.33105	5.72461	7.04492	8.14648			-55.76	-0.4209	-0.29248	-0.57178	-0.76856			6.64	0.897948	0.823241	2.66699	3.40771	8.55957
	7.24	-0.14746	-0.27783	0.752441	1.6084	4.39014			7.04	4.85156	5.32324	5.72265	7.04688	8.13867			-55.66	-0.41309	-0.28955	-0.56397	-0.74512			6.74	0.899902	0.836914	2.6748	3.41748	8.56934
	7.34	-0.14258	-0.27197	0.742676	1.6084	4.39014			7.14	4.85938	5.34082	5.7207	7.04102	8.14258			-55.56	-0.4209	-0.29932	-0.57178	-0.74902			6.84	0.915527	0.853516	2.68652	3.42236	8.58594
	7.44	-0.13965	-0.26807	0.756348	1.6084	4.3999			7.24	4.86133	5.33691	5.7207	7.05273	8.14844			-55.46	-0.43652	-0.31104	-0.60107	-0.76367			6.94	0.92334	0.854492	2.69824	3.43994	8.59766
	7.54	-0.13574	-0.26416	0.766113	1.61719	4.40381			7.34	4.85352	5.34082	5.73047	7.04883	8.13672			-55.36	-0.42676	-0.3169	-0.61084	-0.77539			7.04	0.92334	0.853516	2.69824	3.43896	8.58105
	7.64	-0.12988	-0.26221	0.771973	1.625	4.41357			7.54	4.85938	5.3252	5.7168	7.03809	8.13477			-55.26	-0.43066	-0.32471	-0.61084	-0.77734			7.14	0.933103	0.862302	2.7041	3.44287	8.58691
	7.84	-0.11035	-0.2583	0.781738	1.63281	4.4292			7.64	4.85938	5.3291	5.70508	7.02734	8.13086			-55.16	-0.42676	-0.34619	-0.60986	-0.79395			7.24	0.936035	0.863281	2.70117	3.45947	8.60156
	8.14	-0.09863	-0.25244	0.77002	1.63965	4.44873			8.24	4.85156	5.30762	5.69922	7.00391	8.10938			-55.06	-0.40918	-0.33643	-0.60693	-0.78809			7.34	0.946777	0.864258	2.71582	3.46533	8.6084
	8.24	-0.09277	-0.2583	0.77002	1.63965	4.44873			8.74	4.85352	5.31543	5.69531	6.99805	8.0957			-54.96	-0.40332	-0.34229	-0.61279	-0.78418			7.44	0.965332	0.867188	2.73633	3.47217	8.60742
	8.34	-0.09863	-0.24854	0.76416	1.63965	4.45264			8.84	4.85156	5.31934	5.70313	6.99902	8.10742			-54.86	-0.35254	-0.34619	-0.604	-0.75488			7.54	0.968262	0.87207	2.73926	3.47803	8.62012
	8.44	-0.08887	-0.2583	0.77002	1.63379	4.45459			8.94	4.85547	5.3291	5.69727	7	8.11133			-54.76	-0.3457	-0.35107	-0.59033	-0.77637			7.64	0.977049	0.882811	2.74219	3.49463	8.62304
	8.54	-0.0791	-0.23877	0.779785	1.64941	4.4624			9.04	4.86132	5.32129	5.69336	7	8.10937			-54.66	-0.36035	-0.35986	-0.61279	-0.77637			7.74	0.976074	0.887695	2.7373	3.49365	8.62012
	8.64	-0.0791	-0.24854	0.779785	1.64941	4.46826			9.14	4.86621	5.31738	5.69922	7.00391	8.10547			-54.56	-0.35254	-0.35889	-0.62256	-0.76856			7.84	0.98584	0.897461	2.75488	3.50244	8.62988
	8.74	-0.06934	-0.23877	0.783691	1.64941	4.47803			9.24	4.89258	5.34082	5.74023	7	8.12109			-54.46	-0.35449	-0.37842	-0.63818	-0.75684			8.04	1.00146	0.915039	2.7666	3.52881	8.63574
	8.84	-0.06348	-0.24268	0.785645	1.64941	4.46924			9.34	4.88477	5.34668	5.74219	7.01953	8.11523			-54.36	-0.32813	-0.34912	-0.62842	-0.7041			8.14	0.991698	0.908202	2.77051	3.52685	8.63574
	8.94	-0.06543	-0.24463	0.783691	1.65332	4.47412			9.44	4.90625	5.34668	5.75195	7.01953	8.11523			-54.26	-0.34668	-0.37744	-0.63428	-0.70215			8.24	1.00049	0.911133	2.78418	3.53271	8.63574
	9.04	-0.05371	-0.2251	0.799316	1.66895	4.48975			9.54	4.91211	5.35839	5.75488	7.03125	8.12695			-54.16	-0.37012	-0.40283	-0.64404	-0.68066			8.34	1.00049	0.912109	2.78125	3.53174	8.63672
	9.14	-0.06348	-0.22315	0.785645	1.66504	4.48584			9.64	4.9082	5.36621	5.76953	7.02344	8.13867			-54.06	-0.40918	-0.43799	-0.67432	-0.66162			8.44	0.991699	0.913086	2.77637	3.52881	8.63184
	9.24	-0.06934	-0.229	0.779785	1.66309	4.47998			9.74	4.91016	5.35449	5.75781	7.02734	8.11523			-53.96	-0.41699	-0.43897	-0.65186	-0.59473			8.54	1.01123	0.928711	2.78223	3.54443	8.63184
	9.34	-0.05762	-0.21729	0.79541	1.6709	4.4917			9.84	4.92383	5.35645	5.77148	7.01758	8.12988			-53.86	-0.48291	-0.43213	-0.73486	-0.67041			8.64	1.01123	0.934568	2.77832	3.55029	8.63769
	9.44	-0.06152	-0.21729	0.791504	1.6748	4.4917			9.94	4.93359	5.35254	5.76953	7.02344	8.13672			-53.76	-0.67432	-0.38818	-0.88818	-0.79395			8.84	1.01709	0.928711	2.77051	3.55225	8.63184
	9.64	-0.05566	-0.22119	0.807129	1.68066	4.49756			10.04	4.9414	5.37793	5.79296	7.0293	8.13671			-53.66	-0.6582	-0.27783	-0.61523	-0.65479			8.94	1.0249	0.94043	2.78223	3.55029	8.63965
	9.74	-0.06738	-0.22315	0.791504	1.68066	4.4917			10.14	4.95996	5.39648	5.81348	7.0332	8.15918			-53.56	-0.49951	-0.25098	-0.24902	-0.5376			9.04	1.03369	0.944336	2.79688	3.56885	8.63672
	9.84	-0.06738	-0.21729	0.791504	1.68066	4.4917			10.34	4.95898	5.38867	5.79883	7.05469	8.17773			-53.46	-0.53174	-0.31104	-0.25391	-0.63037			9.14	1.02978	0.950193	2.80371	3.56592	8.64355
	9.94	-0.05371	-0.20752	0.791504	1.69043	4.4917			10.44	4.95508	5.40332	5.79688	7.05664	8.17188			-53.36	-0.57275	-0.31201	-0.24902	-0.67725			9.34	1.03467	0.942383	2.81738	3.5835	8.65723
	10.14	-0.04785	-0.19775	0.799316	1.69238	4.50537			10.54	4.96093	5.41699	5.80468	7.05664	8.18554			-53.26	-0.625	-0.32275	-0.41992	-0.75391			9.64	1.03271	0.9541	2.82715	3.59326	8.65625
	10.24	-0.03809	-0.18799	0.809082	1.70801	4.521			10.74	4.96094	5.41113	5.82031	7.05469	8.19727			-53.16	-0.59766	-0.24023	-0.50244	-0.73047			9.74	1.03076	0.948242	2.83691	3.60791	8.65918
	10.34	-0.02832	-0.17432	0.809082	1.70801	4.53076			10.84	4.95703	5.41699	5.82227	7.05273	8.19336			-53.06	-0.54785	-0.12158	-0.51221	-0.70215			9.84	1.02686	0.938477	2.82324	3.59326	8.66113
	10.44	-0.02832	-0.16846	0.809082	1.70801	4.521			10.94	4.95117	5.39355	5.80078	7.05469	8.17188			-52.96	-0.48877	-0.0957	-0.57568	-0.64111			10.14	1.0542	0.94531	2.86035	3.61865	8.6709
	10.54	-0.03418	-0.16846	0.809082	1.70801	4.521			11.04	4.95117	5.39941	5.80273	7.02539	8.17382			-52.86	-0.49121	-0.18213	-0.61523	-0.64111			10.24	1.0542	0.938477	2.87207	3.62842	8.68262
	10.64	-0.0127	-0.15869	0.82373	1.71191	4.53076			11.14	4.94727	5.3916	5.80469	7.02344	8.16406			-52.76	-0.63477	-0.3335	-0.65723	-0.7583			10.34	1.05127	0.942383	2.87012	3.63818	8.68652
	10.74	-0.01855	-0.15869	0.830566	1.71777	4.53076			11.34	4.96289	5.3916	5.81055	7.01758	8.1582			-52.66	-0.7749	-0.46289	-0.62549	-0.85156			10.94	1.06982	0.932617	2.87012	3.61768	8.68848
	10.84	-0.00879	-0.14893	0.830566	1.71777	4.54053			11.44	4.95508	5.38965	5.81445	7.01953	8.16211			-52.56	-0.78076	-0.48389	-0.58936	-0.83984			11.04	1.07373	0.916992	2.86621	3.61084	8.68848
	10.94	-0.0127	-0.1626	0.82666	1.71387	4.53662			11.54	4.96875	5.40136	5.82812	7	8.17578			-52.46	-0.64648	-0.38623	-0.58154	-0.71289			11.14	1.06787	0.920897	2.85644	3.61279	8.68262
	11.14	-0.0127	-0.14307	0.846191	1.71387	4.54639			11.64	4.96875	5.40332	5.82031	7.01172	8.17188			-52.36	-0.55469	-0.31787	-0.56104	-0.63867			11.24	1.06592	0.916992	2.86621	3.62061	8.69043
	11.24	-0.00684	-0.14697	0.842285	1.71973	4.55225			11.74	4.9707	5.40918	5.82813	7.01758	8.18164			-52.26	-0.55078	-0.29834	-0.54053	-0.61914			11.34	1.07764	0.918945	2.86621	3.62256	8.69043
	11.34	0.00293	-0.13721	0.852051	1.72461	4.56201			11.84	4.97461	5.40137	5.82813	7.01172	8.19922			-52.16	-0.56055	-0.30811	-0.52002	-0.61719			11.44	1.07471	0.917969	2.88086	3.61768	8.69531
	11.44	0.00293	-0.12744	0.855957	1.73145	4.55225			12.04	4.96484	5.41504	5.83398	7.01758	8.1914			-52.06	-0.53027	-0.27588	-0.48389	-0.60645			11.54	1.08154	0.914063	2.87793	3.62256	8.69043
	11.54	0.00293	-0.13721	0.861816	1.73145	4.55225			12.14	4.9707	5.41895	5.82813	7.03027	8.19336			-51.96	-0.48535	-0.25244	-0.4624	-0.6084			11.64	1.07959	0.913084	2.87304	3.63037	8.69433
	11.64	0.00684	-0.11768	0.875488	1.74121	4.56201			12.24	4.9668	5.41504	5.84766	7.03125	8.19531			-51.86	-0.46973	-0.26221	-0.47022	-0.625			11.74	1.06787	0.907227	2.87012	3.61865	8.69238
	11.74	0.012695	-0.11768	0.871582	1.74121	4.56201			12.34	4.96582	5.41309	5.85156	7.04688	8.19922			-51.76	-0.45801	-0.27393	-0.46826	-0.63184			11.84	1.06885	0.90918	2.88184	3.61865	8.69238
	11.84	0.022461	-0.104	0.881348	1.74512	4.57178			12.44	4.98047	5.41504	5.86523	7.04492	8.19531			-51.66	-0.45801	-0.2583	-0.47315	-0.63184			12.14	1.07178	0.887693	2.87207	3.63428	8.69238
	11.94	0.026367	-0.09424	0.875488	1.75488	4.57959			12.54	4.98437	5.41894	5.88086	7.05078	8.20703			-51.56	-0.4541	-0.25049	-0.47607	-0.61816			12.34	1.07764	0.893555	2.87598	3.63818	8.69629
	12.04	0.032227	-0.08838	0.871582	1.76074	4.59131			12.74	4.99609	5.43066	5.89844	7.05078	8.20703			-51.46	-0.43848	-0.24268	-0.46436	-0.61231			12.54	1.07568	0.891602	2.87598	3.62842	8.69141
	12.14	0.032227	-0.07861	0.881348	1.77051	4.59131			13.74	4.98828	5.41113	5.93555	7.0752	8.19727			-51.36	-0.43457	-0.24854	-0.45654	-0.61231			12.64	1.07568	0.883787	2.88769	3.63232	8.69043
	12.24	0.032227	-0.07861	0.871582	1.77051	4.59131			13.84	4.99609	5.42871	5.93945	7.06055	8.2168			-51.26	-0.43359	-0.24951	-0.46533	-0.61523			12.94	1.07764	0.893555	2.88379	3.63037	8.69629
	12.34	0.041992	-0.06885	0.885254	1.77051	4.60107			13.94	4.99023	5.41699	5.92773	7.06055	8.21289			-51.16	-0.42676	-0.24072	-0.46826	-0.6084			13.04	1.07568	0.907227	2.8916	3.62939	8.70605
	12.44	0.051758	-0.06885	0.891113	1.78027	4.61084			14.04	4.99023	5.42871	5.94336	7.06445	8.21875			-51.06	-0.41309	-0.21924	-0.44482	-0.59863			13.14	1.07763	0.905272	2.89355	3.62256	8.70215
	12.54	0.071289	-0.05908	0.900879	1.78223	4.62061			14.14	4.98242	5.41699	5.9375	7.05859	8.20703			-50.96	-0.38379	-0.18799	-0.42334	-0.58301			13.24	1.07959	0.915039	2.89746	3.62842	8.7041
	12.64	0.057617	-0.06299	0.900879	1.78418	4.6167			14.24	4.97852	5.4209	5.93359	7.05469	8.21484			-50.86	-0.3877	-0.19873	-0.44385	-0.59375			13.34	1.07373	0.913086	2.88281	3.63428	8.70605
	12.84	0.051758	-0.06885	0.88916	1.78223	4.61084			14.34	4.99023	5.42676	5.94141	7.05664	8.21484			-50.76	-0.37793	-0.19971	-0.43897	-0.60059			13.44	1.08545	0.916992	2.88965	3.63232	8.72949
	12.94	0.061523	-0.05908	0.898926	1.79785	4.62061			14.44	4.97852	5.41895	5.93555	7.07227	8.20703			-50.66	-0.3877	-0.21924	-0.45264	-0.60449			13.54	1.0874	0.924805	2.90137	3.64209	8.7373
	13.04	0.061523	-0.05908	0.88916	1.79199	4.62061			14.54	4.98242	5.4248	5.93945	7.07813	8.19531			-50.56	-0.39356	-0.21924	-0.47217	-0.62793			13.64	1.07959	0.924804	2.90723	3.63818	8.7373
	13.14	0.049805	-0.05908	0.88916	1.79785	4.61084			14.74	4.98828	5.42676	5.94531	7.05859	8.18359			-50.46	-0.38965	-0.23877	-0.47998	-0.6416			13.74	1.07373	0.915039	2.90137	3.64795	8.7373
	13.24	0.06543	-0.04736	0.891113	1.7998	4.62256			14.84	4.98047	5.41504	5.92578	7.04785	8.16602			-50.36	-0.37891	-0.23975	-0.46924	-0.63086			13.84	1.0708	0.926758	2.90527	3.65186	8.74707
	13.34	0.071289	-0.04736	0.89502	1.7998	4.62256			14.94	4.98828	5.42676	5.92578	7.04102	8.16602			-50.26	-0.37207	-0.23486	-0.46436	-0.63086			14.04	1.06396	0.916992	2.89551	3.6499	8.74512
	13.44	0.071289	-0.05713	0.900879	1.79395	4.62256			15.04	4.99218	5.43847	5.92968	7.04102	8.18164			-50.16	-0.37305	-0.229	-0.46436	-0.64356			14.24	1.06396	0.928711	2.89551	3.64795	8.74121
	13.64	0.081055	-0.03369	0.904785	1.7998	4.63232			15.14	4.98047	5.43066	5.91016	7.05273	8.16406			-50.06	-0.36816	-0.21143	-0.47217	-0.64551			14.34	1.06982	0.938477	2.90137	3.65771	8.74707
	13.74	0.071289	-0.03174	0.910645	1.7998	4.63232			15.24	4.96875	5.43652	5.9082	7.05664	8.14648			-49.96	-0.36816	-0.21729	-0.47803	-0.63184			14.44	1.07471	0.9375	2.90039	3.6626	8.74609
	13.84	0.081055	-0.02393	0.925293	1.80957	4.64209			15.34	4.96875	5.42871	5.90918	7.03906	8.1543			-49.86	-0.35449	-0.21338	-0.46436	-0.61133			14.54	1.07178	0.93457	2.90723	3.66943	8.74707
	13.94	0.084961	-0.01807	0.922363	1.80371	4.63232			15.44	4.97363	5.43457	5.92773	7.03906	8.16211			-49.76	-0.3584	-0.21826	-0.46045	-0.60059			14.64	1.07178	0.946287	2.90527	3.66553	8.75879
	14.04	0.100586	-0.0083	0.922363	1.81934	4.64209			15.54	4.98046	5.42675	5.93945	7.03906	8.16796			-49.66	-0.36035	-0.22119	-0.45654	-0.59082			14.74	1.06787	0.956055	2.90918	3.65967	8.75391
	14.14	0.09082	-0.0083	0.922363	1.82324	4.64209			15.64	4.98438	5.43066	5.93945	7.03906	8.16797			-49.56	-0.36035	-0.2251	-0.44482	-0.58106			14.94	1.04639	0.948242	2.90137	3.66357	8.75098
	14.24	0.09082	-0.0083	0.912598	1.8291	4.646			15.74	4.98047	5.44434	5.93164	7.04297	8.16406			-49.46	-0.3584	-0.229	-0.44287	-0.58496			15.04	1.04053	0.939453	2.89355	3.65771	8.75488
	14.34	0.100586	-0.0083	0.92627	1.8291	4.646			15.84	4.98047	5.44824	5.94922	7.03906	8.16797			-49.36	-0.37207	-0.229	-0.44873	-0.5957			15.14	1.03662	0.938476	2.89355	3.65381	8.75683
	14.44	0.100586	-0.0083	0.922363	1.8291	4.64404			15.94	4.99219	5.45605	5.95313	7.05078	8.16797			-49.26	-0.36426	-0.21533	-0.43897	-0.58691			15.24	1.06201	0.954102	2.90527	3.66553	8.77637
	14.54	0.100586	0.00537	0.924316	1.83887	4.65967			16.04	5.0039	5.46386	5.95507	7.05469	8.17578			-49.16	-0.35449	-0.21924	-0.4292	-0.58496			15.34	1.04834	0.942383	2.8877	3.6499	8.77637
	14.64	0.100586	0.011231	0.930176	1.83301	4.65967			16.14	5.00977	5.46387	5.94727	7.06445	8.16406			-49.06	-0.34277	-0.21924	-0.42334	-0.58106			15.44	1.04053	0.948242	2.89258	3.65967	8.78613
	14.74	0.100586	0.011231	0.92041	1.83887	4.66357			16.24	5.00977	5.45605	5.94727	7.03906	8.17578			-48.96	-0.36426	-0.229	-0.4292	-0.57129			15.54	1.03076	0.942383	2.88574	3.65771	8.78223
	14.84	0.110352	0.020996	0.934082	1.84863	4.66553			16.34	5.02148	5.45605	5.95898	7.05078	8.16797			-48.86	-0.36719	-0.22998	-0.42627	-0.57031			15.74	1.01709	0.926758	2.88184	3.66357	8.79199
	14.94	0.114258	0.024902	0.943848	1.84082	4.67334			16.44	5.04102	5.46777	5.98242	7.05078	8.1875			-48.76	-0.37402	-0.229	-0.43701	-0.58106			15.84	1.021	0.932617	2.88184	3.66553	8.80566
	15.04	0.124023	0.036621	0.949707	1.85645	4.68311			16.54	5.04101	5.47168	5.98828	7.07422	8.1875			-48.66	-0.37402	-0.23877	-0.42725	-0.57129			15.94	1.0249	0.936523	2.87988	3.66357	8.80566
	15.14	0.129883	0.040527	0.953613	1.85645	4.68896			16.64	5.04102	5.47754	5.97656	7.08008	8.1875			-48.56	-0.37402	-0.24365	-0.43213	-0.57129			16.04	1.02686	0.942383	2.88184	3.66748	8.80566
	15.44	0.141602	0.042481	0.965332	1.8584	4.70068			16.74	5.04883	5.47363	5.98828	7.07227	8.17578			-48.46	-0.34961	-0.21729	-0.41357	-0.54004			16.14	1.03271	0.944334	2.87793	3.66943	8.80371
	15.64	0.151367	0.052246	0.971191	1.86328	4.71045			16.84	5.05273	5.46582	6.00586	7.07617	8.17578			-48.36	-0.3457	-0.21826	-0.41846	-0.5293			16.24	1.02686	0.936523	2.86621	3.65967	8.80176
	15.74	0.151367	0.040527	0.975098	1.87012	4.71045			16.94	5.0625	5.45801	5.99805	7.07617	8.17969			-48.26	-0.35938	-0.2085	-0.4126	-0.52344			16.34	1.04248	0.938477	2.87598	3.66357	8.81738
	15.84	0.155273	0.044434	0.975098	1.87402	4.70459			17.04	5.06836	5.46386	5.99609	7.06641	8.16601			-48.16	-0.32324	-0.1626	-0.37256	-0.47949			16.44	1.05029	0.942383	2.87598	3.66357	8.82129
	15.94	0.161133	0.050293	0.984863	1.87012	4.71045			17.14	5.07227	5.46387	6.01172	7.06641	8.17773			-48.06	-0.29199	-0.14307	-0.3374	-0.45996			16.74	1.05225	0.952148	2.87402	3.66943	8.82715
	16.04	0.161133	0.050293	0.990723	1.87402	4.71436			17.24	5.07227	5.45605	6.0293	7.07031	8.17773			-47.96	-0.30469	-0.14502	-0.33545	-0.46094			16.84	1.05225	0.952148	2.86621	3.6792	8.82324
	16.14	0.166016	0.050293	0.990723	1.87988	4.72021			17.34	5.08008	5.46875	6.0293	7.07031	8.18555			-47.86	-0.31738	-0.15674	-0.33154	-0.47363			18.44	1.06201	0.952148	2.88574	3.68701	8.8252
	16.24	0.167969	0.050293	0.980957	1.87988	4.72021			17.44	5.09668	5.49219	6.05176	7.07813	8.20605			-47.76	-0.32422	-0.16455	-0.33447	-0.48145			18.64	1.07373	0.959958	2.89746	3.70849	8.83691
	17.24	0.192383	0.056152	0.994629	1.88965	4.72021			17.54	5.10351	5.49902	6.07031	7.08301	8.21484			-47.66	-0.33789	-0.17139	-0.34815	-0.48242			18.74	1.07373	0.952148	2.90332	3.7085	8.83301
	17.54	0.192383	0.050293	0.990723	1.88965	4.72412			17.64	5.10352	5.47949	6.07031	7.09766	8.20898			-47.56	-0.33887	-0.18213	-0.35693	-0.49902			18.84	1.07568	0.946289	2.88965	3.71045	8.83105
	17.64	0.196289	0.044434	0.980957	1.88965	4.72998			17.74	5.10352	5.49121	6.08203	7.07227	8.20898			-47.46	-0.3291	-0.17822	-0.35693	-0.49902			18.94	1.08643	0.942383	2.90527	3.71631	8.83496
	17.74	0.211914	0.060059	0.990723	1.88965	4.73975			17.84	5.11133	5.49414	6.0957	7.08398	8.2207			-47.36	-0.32324	-0.16162	-0.35107	-0.49316			19.04	1.07178	0.944336	2.90723	3.71826	8.83691
	17.84	0.22168	0.060059	0.994629	1.88965	4.72998			17.94	5.11133	5.47559	6.08789	7.08008	8.22656			-47.26	-0.32324	-0.16162	-0.36182	-0.50977			19.14	1.08545	0.942381	2.90722	3.72217	8.84668
	18.04	0.22168	0.060059	0.990723	1.8877	4.72998			18.04	5.12304	5.49218	6.09179	7.06836	8.23828			-47.16	-0.31934	-0.1626	-0.36279	-0.5166			19.24	1.0874	0.952148	2.90723	3.73779	8.84668
	18.14	0.22168	0.060059	0.994629	1.8877	4.72998			18.14	5.13477	5.51074	6.09375	7.07227	8.25			-47.06	-0.30762	-0.13721	-0.35693	-0.50879			19.34	1.07959	0.952148	2.91504	3.72607	8.84473
	18.24	0.211914	0.060059	0.990723	1.8877	4.72021			18.24	5.12695	5.49902	6.08789	7.08398	8.23828			-46.96	-0.30762	-0.13721	-0.38037	-0.52051			19.44	1.07568	0.948242	2.91113	3.72217	8.85059
	18.54	0.217773	0.056152	1.00049	1.8877	4.7085			18.34	5.13281	5.49902	6.07617	7.07227	8.23828			-46.86	-0.28418	-0.12744	-0.3833	-0.52344			19.54	1.08154	0.954102	2.91699	3.72803	8.8623
	18.64	0.22168	0.063965	1.01025	1.8877	4.71826			18.44	5.13281	5.4873	6.06836	7.07227	8.24219			-46.76	-0.26856	-0.11182	-0.40186	-0.52637			19.64	1.08545	0.952147	2.93066	3.72998	8.86035
	18.74	0.231445	0.065918	1.00439	1.8877	4.71826			18.54	5.13281	5.51074	6.08007	7.06055	8.24414			-46.66	-0.2627	-0.11182	-0.41748	-0.55176			19.74	1.08545	0.952148	2.94238	3.73584	8.87598
	18.84	0.236328	0.055176	1.01514	1.88281	4.72314			18.64	5.14063	5.49902	6.07617	7.06055	8.23047			-46.56	-0.27832	-0.11865	-0.44287	-0.5957			19.94	1.06689	0.949219	2.93164	3.73291	8.87695
	18.94	0.238281	0.066895	1.00732	1.88477	4.7251			18.74	5.14453	5.49902	6.08008	7.06055	8.24023			-46.46	-0.25879	-0.10791	-0.44092	-0.60059			20.04	1.07373	0.954102	2.93848	3.73975	8.8877
	19.14	0.237305	0.069824	1.0083	1.8877	4.72803			18.84	5.15234	5.49902	6.07617	7.05273	8.23633			-46.36	-0.25684	-0.12061	-0.46045	-0.59863			20.14	1.06787	0.944335	2.93848	3.73975	8.88769
	22.94	0.233398	0.101074	0.995605	1.88184	4.75342			18.94	5.14063	5.49902	6.07617	7.07227	8.22461			-46.26	-0.24805	-0.12061	-0.46338	-0.59473			20.24	1.06592	0.952148	2.95215	3.7417	8.8916
	23.04	0.243164	0.11084	1.01221	1.8916	4.76318			19.04	5.14453	5.51074	6.06055	7.05664	8.2207			-46.16	-0.24805	-0.12744	-0.4624	-0.58887			20.34	1.06201	0.954102	2.94434	3.74756	8.89746
	23.14	0.243164	0.11084	1.01221	1.8916	4.76318			19.14	5.14258	5.50879	6.07031	7.04297	8.23047			-46.06	-0.24707	-0.12549	-0.4624	-0.5752			20.44	1.06396	0.954102	2.94824	3.73975	8.90918
	23.34	0.256836	0.124512	1.02588	1.90332	4.77686			19.24	5.13477	5.50879	6.07422	7.05273	8.23047			-45.96	-0.23731	-0.12354	-0.45459	-0.55078			20.54	1.06592	0.948242	2.95215	3.74365	8.91309
	23.44	0.25293	0.135254	1.03174	1.90918	4.78662			19.34	5.12305	5.50879	6.06836	7.04102	8.21875			-45.86	-0.22754	-0.12158	-0.43115	-0.53027			20.64	1.08154	0.959959	2.95801	3.75732	8.93457
	23.54	0.25293	0.14209	1.02197	1.90918	4.77881			19.44	5.11914	5.50879	6.08008	7.04102	8.23047			-45.76	-0.21777	-0.11377	-0.40088	-0.48731			20.84	1.0874	0.948242	2.97363	3.76318	8.94238
	23.74	0.25293	0.13623	1.02588	1.90723	4.77686			19.54	5.12109	5.5166	6.08398	7.05273	8.22656			-45.66	-0.21387	-0.11182	-0.38428	-0.47559			20.94	1.10303	0.954102	2.97266	3.76904	8.94824
	23.84	0.256836	0.14209	1.02197	1.90918	4.771			19.64	5.10938	5.5166	6.07031	7.04102	8.22656			-45.56	-0.21191	-0.11768	-0.37451	-0.46094			21.04	1.10498	0.954102	2.98438	3.771	8.97168
	23.94	0.262695	0.14209	1.02588	1.90918	4.7749			19.74	5.125	5.53223	6.0918	7.04102	8.24219			-45.46	-0.23926	-0.12158	-0.37451	-0.46191			21.14	1.1167	0.958006	2.99219	3.78271	8.9873
	24.04	0.272461	0.151855	1.03174	1.91895	4.79053			19.84	5.13477	5.5498	6.10938	7.05176	8.25977			-45.36	-0.24707	-0.12158	-0.34619	-0.41699			21.24	1.10498	0.96582	2.98926	3.78076	9.00098
	24.14	0.262695	0.151855	1.03174	1.92285	4.79053			19.94	5.12305	5.54199	6.09766	7.07031	8.24805			-45.26	-0.24414	-0.11182	-0.32178	-0.37891			21.44	1.1167	0.973633	2.99902	3.79248	9.00684
	24.24	0.266602	0.159668	1.02979	1.93262	4.79443			20.04	5.12305	5.54395	6.08594	7.05859	8.24805			-45.16	-0.21484	-0.07861	-0.29053	-0.33691			21.54	1.12061	0.973633	3.00488	3.80811	9.0166
	24.34	0.272461	0.161621	1.0415	1.93848	4.80029			20.14	5.11133	5.53027	6.08594	7.05859	8.23633			-45.06	-0.19238	-0.09229	-0.27686	-0.31738			21.64	1.13427	0.987302	3.01855	3.81006	9.03027
	24.44	0.272461	0.161621	1.03174	1.93457	4.80029			20.24	5.12305	5.53027	6.09766	7.05078	8.24805			-44.96	-0.18652	-0.09814	-0.27979	-0.31836			21.74	1.14209	0.983398	3.02637	3.81787	9.03809
	24.54	0.282227	0.161621	1.0415	1.93262	4.81006			20.34	5.11523	5.53418	6.09473	7.05859	8.24023			-44.86	-0.18066	-0.10205	-0.26514	-0.29785			21.84	1.13818	0.983398	3.02637	3.81787	9.04785
	24.64	0.282227	0.161621	1.0415	1.93848	4.80029			20.44	5.12891	5.54004	6.09473	7.05273	8.25391			-44.76	-0.17969	-0.10791	-0.25342	-0.26465			21.94	1.13232	0.983398	3.01465	3.81787	9.05762
	24.74	0.295898	0.165527	1.03564	1.94238	4.8042			20.54	5.11133	5.52832	6.09277	7.07031	8.25977			-44.66	-0.16895	-0.09912	-0.22315	-0.23828			22.14	1.14111	0.976561	3.01953	3.8208	9.07031
	24.84	0.291992	0.171387	1.0415	1.94824	4.81006			20.64	5.10352	5.52051	6.0752	7.07031	8.24805			-44.56	-0.16895	-0.09619	-0.20068	-0.21777			22.24	1.15381	0.995117	3.03809	3.84912	9.08887
	25.04	0.295898	0.175293	1.05518	1.94238	4.80811			20.74	5.10352	5.52051	6.09277	7.05859	8.24805			-44.46	-0.17285	-0.09424	-0.19092	-0.21777			22.34	1.14795	0.979492	3.04004	3.84326	9.09277
	25.14	0.301758	0.181152	1.05127	1.94824	4.81982			21.04	5.10156	5.53808	6.10449	7.0625	8.26562			-44.36	-0.17871	-0.1001	-0.19092	-0.23145			22.44	1.15186	0.983398	3.05566	3.84912	9.1084
	25.24	0.307617	0.181152	1.06104	1.95215	4.81982			21.14	5.11328	5.53809	6.11426	7.07813	8.26953			-44.26	-0.16895	-0.08838	-0.18506	-0.23731			22.54	1.16162	0.993164	3.06543	3.84717	9.11816
	25.44	0.305664	0.181152	1.04932	1.95801	4.81982			21.24	5.10547	5.5459	6.125	7.08984	8.26172			-44.16	-0.17481	-0.09814	-0.19873	-0.25098			22.64	1.15185	0.983397	3.05566	3.84717	9.11816
	25.54	0.311523	0.175293	1.05322	1.95801	4.81982			21.34	5.11914	5.5459	6.12695	7.09375	8.26367			-44.06	-0.15723	-0.07861	-0.2085	-0.25684			22.74	1.15771	0.989258	3.06152	3.85303	9.12207
	25.64	0.321289	0.190918	1.05908	1.96289	4.81982			21.44	5.13086	5.55762	6.12695	7.10742	8.27539			-43.96	-0.14356	-0.08057	-0.23193	-0.27051			22.84	1.17334	0.995117	3.07715	3.85889	9.12793
	25.74	0.311523	0.190918	1.06299	1.96973	4.81982			21.54	5.13477	5.55371	6.12305	7.10742	8.2793			-43.86	-0.13965	-0.08057	-0.24561	-0.29981			23.24	1.15381	0.995117	3.0918	3.86865	9.12598
	25.84	0.311523	0.190918	1.05908	1.96973	4.81006			21.64	5.15234	5.57715	6.13672	7.11133	8.29688			-43.76	-0.13965	-0.08057	-0.25732	-0.31543			23.34	1.15967	0.995117	3.09863	3.87842	9.12598
	25.94	0.316406	0.186035	1.06396	1.96484	4.81494			21.74	5.16016	5.59668	6.15625	7.12891	8.30469			-43.66	-0.13965	-0.07471	-0.27881	-0.3457			23.44	1.15576	0.993164	3.1084	3.87842	9.12598
	26.14	0.328125	0.197754	1.06982	1.97656	4.83643			21.84	5.16406	5.60059	6.17188	7.14844	8.32031			-43.56	-0.13184	-0.06299	-0.3042	-0.36133			23.54	1.16553	0.987305	3.10059	3.88232	9.12598
	26.24	0.321289	0.179199	1.05908	1.97363	4.82959			21.94	5.16211	5.59863	6.16992	7.15234	8.31445			-43.46	-0.14746	-0.06885	-0.32568	-0.36328			23.74	1.17334	0.985352	3.1084	3.88818	9.12598
	26.34	0.331055	0.194824	1.05908	1.97949	4.82959			22.04	5.17773	5.60254	6.18359	7.15039	8.32226			-43.36	-0.14941	-0.0708	-0.35303	-0.37207			23.84	1.17334	0.993164	3.10352	3.89404	9.12598
	26.44	0.331055	0.188965	1.05908	1.97949	4.81982			22.14	5.19141	5.60449	6.17773	7.16211	8.32422			-43.26	-0.14551	-0.05713	-0.35498	-0.36231			23.94	1.18701	0.99707	3.10352	3.89209	9.13965
	26.74	0.342773	0.210449	1.08252	1.97949	4.83545			22.24	5.1875	5.60449	6.16602	7.16211	8.32422			-43.16	-0.13965	-0.06104	-0.35303	-0.37598			24.04	1.18115	0.99707	3.11621	3.88818	9.13574
	26.84	0.34668	0.200684	1.08252	1.97949	4.84131			22.34	5.19922	5.62012	6.16992	7.16406	8.32422			-43.06	-0.14941	-0.05908	-0.35303	-0.38574			24.44	1.16357	0.983398	3.09668	3.88818	9.13574
	27.14	0.352539	0.196777	1.07861	1.97559	4.84326			22.44	5.19629	5.61914	6.16895	7.1582	8.32129			-42.96	-0.13184	-0.05322	-0.34912	-0.37207			24.54	1.16162	0.973633	3.08691	3.87842	9.13574
	27.24	0.338867	0.190918	1.07666	1.97363	4.83154			22.54	5.19141	5.61035	6.1582	7.1748	8.31641			-42.86	-0.14746	-0.04932	-0.34229	-0.37793			24.94	1.16357	0.983398	3.0752	3.87842	9.1416
	27.34	0.34082	0.194824	1.08643	1.9834	4.82959			22.64	5.19531	5.60645	6.15039	7.16992	8.31641			-42.76	-0.1416	-0.05322	-0.34326	-0.37988			25.14	1.17138	0.981443	3.08008	3.87842	9.14551
	27.44	0.352539	0.190918	1.08057	1.98926	4.84131			22.74	5.18945	5.58691	6.14844	7.18164	8.30859			-42.66	-0.1543	-0.07568	-0.35986	-0.37695			25.54	1.15479	0.977539	3.06543	3.86865	9.14551
	27.74	0.348633	0.196777	1.07666	1.98535	4.83545			22.84	5.1875	5.60254	6.15234	7.16797	8.3125			-42.56	-0.14746	-0.06885	-0.34912	-0.37012			25.64	1.16162	0.991209	3.07519	3.87256	9.15527
	27.84	0.356445	0.194824	1.07471	1.9834	4.8335			22.94	5.19336	5.59668	6.1582	7.16602	8.32617			-42.46	-0.14746	-0.05908	-0.34912	-0.36035			25.84	1.14209	0.983398	3.06543	3.86865	9.15723
	27.94	0.362305	0.214355	1.08447	1.98926	4.83936			23.04	5.19922	5.59668	6.1582	7.17969	8.31445			-42.36	-0.15137	-0.05713	-0.34131	-0.3584			25.94	1.15186	0.983398	3.06543	3.86865	9.16699
	28.04	0.362305	0.210449	1.09033	1.98926	4.83936			23.14	5.21484	5.60059	6.16602	7.17969	8.33008			-42.26	-0.14551	-0.05713	-0.34326	-0.3584			26.04	1.1499	0.981445	3.05566	3.86865	9.16504
	28.14	0.366211	0.210449	1.08057	1.98926	4.83936			23.24	5.20117	5.59863	6.16992	7.1875	8.32813			-42.16	-0.1416	-0.04932	-0.32373	-0.33106			26.14	1.15478	0.981443	3.05566	3.86865	9.16504
	28.24	0.37207	0.200684	1.08057	1.98926	4.82959			23.34	5.2207	5.61816	6.18945	7.19141	8.33203			-42.06	-0.13965	-0.0415	-0.32178	-0.32715			26.24	1.14697	0.96582	3.04395	3.85693	9.16504
	28.44	0.381836	0.215332	1.09033	1.98926	4.82959			23.44	5.21289	5.59863	6.16992	7.19922	8.31836			-41.96	-0.15527	-0.04736	-0.32764	-0.3291			26.34	1.15186	0.973633	3.0459	3.87842	9.16309
	28.54	0.381836	0.210449	1.09033	1.98926	4.82959			23.54	5.2207	5.60644	6.16992	7.17188	8.32617			-41.86	-0.15527	-0.04736	-0.31397	-0.31738			26.74	1.15186	0.96582	3.0459	3.88232	9.16699
	28.64	0.381836	0.210449	1.08057	1.9834	4.82373			23.64	5.23633	5.62598	6.19141	7.17969	8.33008			-41.76	-0.14746	-0.04541	-0.29834	-0.31934			26.94	1.14014	0.944336	3.03613	3.88818	9.16309
	28.84	0.397461	0.224121	1.08447	1.98926	4.8335			23.74	5.24219	5.62598	6.18555	7.17969	8.32813			-41.66	-0.14746	-0.03955	-0.29834	-0.30957			27.34	1.14209	0.93457	3.03613	3.87842	9.1709
	28.94	0.391602	0.22998	1.09033	1.98926	4.82959			23.84	5.24609	5.62207	6.18555	7.19141	8.32422			-41.56	-0.14258	-0.04248	-0.29346	-0.31445			27.44	1.13037	0.93457	3.03613	3.87842	9.17676
	29.04	0.391602	0.226074	1.09033	1.98926	4.82959			23.94	5.24414	5.6084	6.18945	7.18359	8.32813			-41.46	-0.14746	-0.04932	-0.29053	-0.32129			27.54	1.14014	0.948242	3.03418	3.88232	9.18652
	29.14	0.391602	0.214355	1.08057	1.98926	4.81982			24.04	5.24414	5.62011	6.18945	7.18164	8.33984			-41.36	-0.14258	-0.04443	-0.28565	-0.31055			27.64	1.13037	0.942382	3.02441	3.87646	9.18262
	29.74	0.407227	0.231934	1.09033	1.98926	4.81982			24.14	5.25391	5.61426	6.19531	7.18164	8.3457			-41.26	-0.13184	-0.04736	-0.28857	-0.32129			27.74	1.14209	0.948242	3.03613	3.87451	9.18652
	29.84	0.413086	0.222168	1.09033	1.98926	4.81982			24.24	5.25586	5.61426	6.21094	7.17578	8.35742			-41.16	-0.13086	-0.05225	-0.2915	-0.33203			27.84	1.14502	0.954102	3.03223	3.86865	9.2002
	30.64	0.401367	0.231934	1.10205	1.98926	4.81006			24.34	5.25391	5.61035	6.20898	7.17969	8.35742			-41.06	-0.13965	-0.06494	-0.3042	-0.33496			27.94	1.15088	0.967773	3.03418	3.88623	9.20996
	30.84	0.401367	0.206543	1.09619	1.9834	4.82178			24.44	5.24805	5.62402	6.21484	7.1875	8.36328			-40.96	-0.13965	-0.0708	-0.31006	-0.34082			28.04	1.146	0.973633	3.04004	3.89014	9.21191
	30.94	0.391602	0.212402	1.09229	1.98926	4.82178			24.54	5.25195	5.6084	6.20703	7.19922	8.36719			-40.86	-0.12988	-0.06494	-0.29053	-0.33106			28.14	1.15185	0.983397	3.04199	3.87842	9.21387
	31.04	0.405273	0.212402	1.10205	1.98926	4.82568			24.64	5.25586	5.61621	6.20313	7.19922	8.37109			-40.76	-0.12695	-0.06592	-0.28565	-0.3125			28.24	1.14893	0.977539	3.03418	3.87646	9.20996
	31.34	0.387695	0.210449	1.09814	1.98047	4.81787			24.74	5.25	5.61621	6.20117	7.19141	8.36523			-40.66	-0.14551	-0.06689	-0.29834	-0.30762			28.34	1.16748	0.983398	3.03809	3.89404	9.21191
	31.44	0.390625	0.214355	1.08643	1.98535	4.81592			24.84	5.25488	5.62109	6.21191	7.19141	8.37012			-40.56	-0.15918	-0.07666	-0.29834	-0.31738			28.44	1.15088	0.977539	3.01855	3.88232	9.2002
	31.54	0.399414	0.220215	1.09229	1.9873	4.81787			24.94	5.26172	5.63184	6.20703	7.19238	8.37695			-40.46	-0.16113	-0.08252	-0.3042	-0.31738			28.54	1.15479	0.991211	3.03418	3.88623	9.20605
	31.74	0.393555	0.225098	1.09229	1.9834	4.82178			25.04	5.26171	5.64941	6.23046	7.20313	8.38867			-40.36	-0.15723	-0.06885	-0.30225	-0.31543			28.64	1.16357	0.993162	3.04004	3.89795	9.21777
	31.84	0.393555	0.231934	1.09619	1.98926	4.82178			25.14	5.26172	5.6416	6.22754	7.21289	8.39258			-40.26	-0.14746	-0.05908	-0.29443	-0.29004			28.74	1.16943	0.993164	3.04199	3.89404	9.20801
	33.04	0.381836	0.23584	1.1001	1.9834	4.82373			25.24	5.27344	5.64355	6.24805	7.20508	8.39453			-40.16	-0.14746	-0.05908	-0.28467	-0.29004			28.84	1.16162	0.993164	3.04199	3.89795	9.19629
	33.14	0.395508	0.251465	1.10986	1.98926	4.83936			25.34	5.2832	5.63965	6.24023	7.21875	8.39844			-40.06	-0.14746	-0.05908	-0.27881	-0.29004			28.94	1.15186	0.991211	3.0459	3.89795	9.19629
	33.24	0.387695	0.241699	1.10107	1.98535	4.83545			25.44	5.27539	5.64355	6.23242	7.21094	8.40234			-39.96	-0.14746	-0.04736	-0.27393	-0.28418			29.04	1.13232	0.995117	3.03418	3.88623	9.19629
	33.44	0.393555	0.253418	1.104	1.98145	4.85107			25.54	5.28906	5.66113	6.24609	7.20703	8.40429			-39.86	-0.16016	-0.06201	-0.28174	-0.2832			29.14	1.14209	1.00293	3.03613	3.88818	9.19824
	33.84	0.393555	0.26123	1.11768	1.9834	4.85107			25.64	5.29297	5.65918	6.25391	7.20898	8.4082			-39.76	-0.1582	-0.06396	-0.28369	-0.28516			29.24	1.15186	1.00684	3.04004	3.90186	9.20605
	34.14	0.399414	0.26123	1.11768	1.99023	4.8667			25.74	5.29297	5.65918	6.25977	7.20117	8.38867			-39.66	-0.16016	-0.07178	-0.2915	-0.29297			29.34	1.15186	1.02246	3.05176	3.89795	9.20605
	34.24	0.383789	0.255371	1.11182	1.99121	4.85596			25.84	5.28125	5.65918	6.25977	7.20117	8.38867			-39.56	-0.15723	-0.05518	-0.28857	-0.28613			29.44	1.14209	1.0127	3.03809	3.89795	9.19629
	34.44	0.393555	0.26123	1.12158	1.99512	4.86279			25.94	5.28906	5.65527	6.25586	7.18164	8.38477			-39.46	-0.15918	-0.0708	-0.29834	-0.2959			29.54	1.15381	1.0127	3.05566	3.89795	9.20801
	34.54	0.387695	0.266113	1.12158	2.00098	4.86279			26.04	5.29687	5.66308	6.26367	7.18945	8.39257			-39.36	-0.15918	-0.06494	-0.29834	-0.30176			29.64	1.14209	1.02246	3.05566	3.89795	9.20801
	34.64	0.381836	0.272949	1.11572	2.00098	4.86279			26.14	5.31445	5.66992	6.28125	7.19727	8.40625			-39.26	-0.15918	-0.06885	-0.29834	-0.30176			29.74	1.14209	1.0166	3.05176	3.89795	9.20605
	34.84	0.381836	0.272949	1.12158	2.00488	4.86279			26.24	5.31641	5.67676	6.26758	7.19922	8.40625			-39.16	-0.15918	-0.07471	-0.29834	-0.29004			29.84	1.14209	1.03223	3.05957	3.89795	9.21582
	36.44	0.379883	0.310059	1.13916	2.00684	4.88232			26.34	5.31055	5.66504	6.26758	7.20703	8.39453			-39.06	-0.15234	-0.05811	-0.29346	-0.29492			29.94	1.15186	1.04199	3.06543	3.8999	9.21582
	36.54	0.37793	0.304199	1.12744	2.00098	4.87256			26.44	5.30273	5.66895	6.27148	7.20703	8.39844			-38.96	-0.14551	-0.05713	-0.29639	-0.28809			30.04	1.15381	1.04199	3.0752	3.89795	9.22754
	36.64	0.381836	0.304199	1.13721	2.00488	4.88232			26.54	5.30664	5.66504	6.27148	7.20313	8.40234			-38.86	-0.14941	-0.05713	-0.28272	-0.28418			30.14	1.15185	1.04199	3.08496	3.90771	9.22754
	36.84	0.381836	0.308105	1.1333	2.00098	4.87646			26.64	5.3125	5.65918	6.27734	7.19531	8.39648			-38.76	-0.15723	-0.07275	-0.28857	-0.28027			30.24	1.16553	1.05664	3.09473	3.91748	9.24512
	36.94	0.381836	0.32373	1.14697	2.01074	4.89209			26.74	5.3125	5.6709	6.28125	7.20117	8.41211			-38.66	-0.1709	-0.07861	-0.28662	-0.29004			30.34	1.17139	1.05371	3.08496	3.90967	9.23535
	37.04	0.381836	0.313965	1.14307	2.01074	4.88232			26.84	5.32031	5.6748	6.28125	7.20508	8.41016			-38.56	-0.18262	-0.08838	-0.29248	-0.2959			30.44	1.17334	1.06348	3.08691	3.91748	9.2373
	37.24	0.376953	0.328613	1.15186	2.01758	4.88721			26.94	5.30859	5.66895	6.2793	7.21484	8.41602			-38.46	-0.18066	-0.08838	-0.28662	-0.29004			30.54	1.18311	1.06348	3.08496	3.91748	9.25098
	37.34	0.360352	0.312012	1.15088	2.01074	4.87061			27.04	5.33398	5.68847	6.30273	7.20898	8.41601			-38.36	-0.18652	-0.09033	-0.28662	-0.2959			30.64	1.17529	1.05371	3.08008	3.91748	9.25683
	37.44	0.365234	0.312012	1.13916	2.01074	4.87061			27.14	5.33984	5.69238	6.30469	7.22852	8.41602			-38.26	-0.18066	-0.09229	-0.28857	-0.27441			30.74	1.18115	1.05762	3.09668	3.91748	9.25684
	37.64	0.366211	0.319824	1.14307	2.0127	4.87842			27.24	5.34375	5.69043	6.29492	7.22852	8.41211			-38.16	-0.17676	-0.08838	-0.2749	-0.27051			30.84	1.19287	1.08496	3.11816	3.94189	9.27051
	37.74	0.37207	0.319824	1.13916	2.01855	4.87842			27.34	5.33008	5.67285	6.30664	7.21289	8.41602			-38.06	-0.19043	-0.10205	-0.28272	-0.28027			30.94	1.18311	1.07324	3.1123	3.9292	9.27637
	37.84	0.381836	0.333496	1.13916	2.01855	4.87842			27.44	5.35352	5.68262	6.30664	7.21875	8.42383			-37.96	-0.18262	-0.08447	-0.2749	-0.2627			31.04	1.18115	1.07715	3.11621	3.9292	9.28613
	37.94	0.375977	0.32959	1.14404	2.01855	4.8833			27.54	5.35547	5.68457	6.30664	7.22266	8.41602			-37.86	-0.17676	-0.07861	-0.26904	-0.25098			31.14	1.19092	1.08301	3.11621	3.9292	9.28613
	38.04	0.391602	0.343262	1.15088	2.02246	4.89404			27.64	5.3418	5.6748	6.31445	7.22852	8.41992			-37.76	-0.17285	-0.07861	-0.26318	-0.24316			31.24	1.18506	1.07324	3.10645	3.93115	9.29004
	38.14	0.385742	0.349121	1.15088	2.02832	4.8999			27.74	5.34766	5.6709	6.32617	7.23242	8.41797			-37.66	-0.16699	-0.07666	-0.26123	-0.23145			31.34	1.19287	1.08496	3.09863	3.93896	9.30762
	38.24	0.391602	0.343262	1.14502	2.03223	4.89014			27.84	5.34375	5.66504	6.33008	7.22656	8.41211			-37.56	-0.16016	-0.08057	-0.26709	-0.22949			31.44	1.19287	1.08301	3.09668	3.93896	9.31543
	38.34	0.401367	0.358887	1.16064	2.03809	4.89404			27.94	5.34766	5.66699	6.32617	7.23047	8.43359			-37.46	-0.17676	-0.09619	-0.26318	-0.23926			31.54	1.19092	1.08301	3.11035	3.94287	9.31543
	38.44	0.389648	0.36377	1.15479	2.03809	4.8999			28.04	5.35645	5.67188	6.33496	7.23828	8.43066			-37.36	-0.17871	-0.08838	-0.24951	-0.24121			31.64	1.19092	1.08301	3.11621	3.94873	9.31543
	38.64	0.379883	0.36084	1.15088	2.03223	4.89014			28.14	5.35254	5.66211	6.33105	7.24316	8.42578			-37.26	-0.17285	-0.07861	-0.23975	-0.23145			31.74	1.19287	1.09863	3.12793	3.9585	9.31738
	38.74	0.379883	0.35498	1.14307	2.03809	4.88428			28.24	5.34863	5.67188	6.34082	7.25	8.44238			-37.16	-0.19824	-0.09229	-0.25342	-0.24121			31.84	1.20264	1.10254	3.12793	3.9585	9.32715
	38.84	0.391602	0.372559	1.16455	2.04004	4.89209			28.34	5.34961	5.67871	6.33594	7.25488	8.4375			-37.06	-0.18457	-0.08252	-0.25342	-0.23731			31.94	1.19092	1.09277	3.11035	3.94873	9.3252
	38.94	0.385742	0.362793	1.16064	2.04395	4.89209			28.44	5.36133	5.69043	6.35156	7.26172	8.44922			-36.96	-0.18848	-0.07666	-0.24756	-0.24121			32.04	1.19873	1.08691	3.12012	3.95654	9.33887
	39.14	0.385742	0.362793	1.16064	2.04395	4.88428			28.54	5.36133	5.67871	6.34961	7.27344	8.4375			-36.86	-0.17871	-0.07666	-0.23779	-0.24121			32.14	1.21045	1.10254	3.12597	3.97803	9.34472
	39.24	0.381836	0.366699	1.15479	2.04395	4.89014			28.64	5.36133	5.69043	6.34961	7.27344	8.44922			-36.76	-0.18262	-0.06689	-0.23779	-0.23145			32.24	1.22217	1.10449	3.12988	3.96826	9.36035
	39.34	0.391602	0.372559	1.17432	2.05957	4.89014			28.74	5.35352	5.67871	6.33789	7.27344	8.44922			-36.66	-0.17285	-0.06787	-0.23389	-0.22949			32.34	1.22217	1.10254	3.13574	3.98193	9.37598
	39.44	0.385742	0.376465	1.17041	2.0498	4.89404			28.84	5.35352	5.69043	6.33789	7.27344	8.46094			-36.56	-0.16895	-0.0708	-0.22998	-0.22754			32.44	1.22998	1.1123	3.12598	3.98779	9.38965
	39.54	0.391602	0.370605	1.17041	2.03809	4.89014			28.94	5.35742	5.69434	6.33398	7.27344	8.45313			-36.46	-0.17481	-0.06689	-0.22803	-0.23731			32.54	1.23389	1.11621	3.13574	3.98779	9.39551
	39.64	0.391602	0.374512	1.17529	2.04199	4.8999			29.04	5.35937	5.69629	6.33593	7.28125	8.46679			-36.36	-0.16309	-0.05322	-0.21826	-0.22168			32.64	1.23975	1.1123	3.12598	3.97607	9.39355
	39.74	0.385742	0.380371	1.17236	2.04785	4.90381			29.14	5.35938	5.7002	6.33984	7.30078	8.4668			-36.26	-0.15527	-0.05518	-0.21436	-0.21777			32.74	1.2417	1.12402	3.12598	3.96826	9.40527
	39.84	0.387695	0.376465	1.17236	2.03418	4.896			29.24	5.36328	5.70996	6.33789	7.30078	8.45898			-36.16	-0.15137	-0.05908	-0.2124	-0.22168			32.84	1.2417	1.1123	3.11035	3.96826	9.39551
	39.94	0.391602	0.370605	1.17236	2.02832	4.89014			29.34	5.36328	5.69824	6.33008	7.29297	8.46289			-36.06	-0.15723	-0.05908	-0.21826	-0.22168			32.94	1.24561	1.11621	3.11621	3.96826	9.41504
	40.04	0.379883	0.364746	1.16064	2.02344	4.89404			29.44	5.36328	5.69824	6.31836	7.29297	8.46094			-35.96	-0.16309	-0.04932	-0.21436	-0.20801			33.04	1.24951	1.1123	3.12598	3.96631	9.41992
	40.14	0.385742	0.376465	1.17041	2.02637	4.896			29.54	5.375	5.71386	6.33007	7.29297	8.46875			-35.86	-0.15332	-0.05127	-0.20361	-0.20215			33.14	1.25342	1.12012	3.11816	3.97412	9.43066
	40.24	0.379883	0.364746	1.16064	2.02441	4.88037			29.64	5.38086	5.7373	6.34082	7.29297	8.48633			-35.76	-0.15918	-0.06104	-0.20068	-0.21191			33.24	1.25732	1.1377	3.12207	3.98389	9.43945
	40.34	0.384766	0.370605	1.16455	2.02051	4.88525			29.74	5.38477	5.7334	6.33203	7.30273	8.48633			-35.66	-0.15918	-0.07471	-0.21436	-0.21191			33.34	1.2417	1.1123	3.11035	3.96826	9.41504
	40.44	0.391602	0.380371	1.17041	2.02051	4.89209			29.84	5.38672	5.73145	6.32227	7.30469	8.49023			-35.56	-0.1582	-0.06396	-0.20557	-0.21094			33.44	1.25928	1.12988	3.12012	3.97217	9.42871
	40.54	0.391602	0.380371	1.17432	2.0127	4.88623			29.94	5.39453	5.7373	6.32813	7.30273	8.48438			-35.46	-0.15527	-0.06104	-0.19873	-0.20996			33.54	1.26904	1.1416	3.12402	3.98584	9.44922
	40.64	0.385742	0.370605	1.17041	2.01855	4.89209			30.04	5.375	5.73926	6.31445	7.3125	8.47852			-35.36	-0.15527	-0.06299	-0.18897	-0.19629			33.64	1.25928	1.13183	3.11816	3.97607	9.45605
	40.74	0.391602	0.374512	1.16064	2.0127	4.89209			30.14	5.38086	5.73145	6.32031	7.3125	8.4707			-35.26	-0.15039	-0.05127	-0.18701	-0.19043			33.74	1.26123	1.1416	3.12598	3.97803	9.46777
	40.84	0.387695	0.376465	1.16064	2.01465	4.89014			30.24	5.38086	5.75293	6.3125	7.30078	8.4707			-35.16	-0.14746	-0.05713	-0.17725	-0.17871			33.84	1.271	1.1416	3.12598	3.97803	9.46777
	40.94	0.397461	0.387207	1.1626	2.02051	4.89209			30.34	5.38086	5.75879	6.31055	7.30469	8.47656			-35.06	-0.14941	-0.04346	-0.16553	-0.18066			33.94	1.26904	1.15137	3.13574	3.97998	9.47559
	41.04	0.393555	0.394043	1.1626	2.01465	4.89209			30.44	5.38086	5.74707	6.31055	7.29883	8.47656			-34.96	-0.14941	-0.05127	-0.16357	-0.19043			34.04	1.27393	1.13184	3.12402	3.97607	9.47559
	41.14	0.393555	0.394043	1.1665	2.03027	4.90186			30.54	5.38086	5.74707	6.31641	7.29102	8.45703			-34.86	-0.14746	-0.05713	-0.16162	-0.19434			34.14	1.28076	1.1416	3.1289	3.97607	9.47949
	41.24	0.393555	0.382324	1.1626	2.0166	4.89795			30.64	5.37305	5.74707	6.30859	7.2793	8.46094			-34.76	-0.15137	-0.05713	-0.17725	-0.2002			34.24	1.26318	1.13184	3.1377	3.9624	9.4873
	41.34	0.393555	0.39209	1.17236	2.02441	4.90576			30.74	5.40234	5.74707	6.3125	7.2832	8.47852			-34.66	-0.15332	-0.05713	-0.17334	-0.19629			34.34	1.27295	1.14648	3.14746	3.96631	9.49707
	41.84	0.40332	0.401855	1.17627	2.03418	4.91162			30.84	5.40234	5.74707	6.31836	7.28906	8.4668			-34.56	-0.1416	-0.0708	-0.16162	-0.19043			34.44	1.26123	1.14355	3.1377	3.96631	9.49121
	42.04	0.40918	0.397949	1.18213	2.03613	4.90771			30.94	5.40234	5.74707	6.33008	7.28516	8.45508			-34.46	-0.13574	-0.06494	-0.16553	-0.19043			34.54	1.25537	1.12402	3.13574	3.95654	9.49707
	42.14	0.395508	0.395996	1.18213	2.03516	4.90186			31.04	5.4082	5.74707	6.33594	7.28711	8.45508			-34.36	-0.1416	-0.07373	-0.15967	-0.2002			34.64	1.26123	1.13183	3.14551	3.96142	9.49512
	42.54	0.401367	0.401855	1.17236	2.03418	4.8999			31.14	5.41992	5.75879	6.34766	7.2793	8.4668			-34.26	-0.1377	-0.06885	-0.15186	-0.19434			34.74	1.25146	1.12207	3.13965	3.96826	9.49512
	42.64	0.391602	0.406738	1.17627	2.03027	4.89502			31.24	5.42383	5.75488	6.35156	7.2793	8.45898			-34.16	-0.15137	-0.06885	-0.14795	-0.19043			34.84	1.25342	1.11426	3.1377	3.9585	9.50098
	42.74	0.386719	0.408691	1.18115	2.03516	4.89697			31.34	5.42969	5.7666	6.34961	7.2832	8.46875			-34.06	-0.15332	-0.06885	-0.14404	-0.19629			34.94	1.25146	1.11816	3.14746	3.9624	9.5166
	42.84	0.394531	0.403809	1.17822	2.04199	4.89404			31.44	5.42969	5.75488	6.35547	7.28125	8.47461			-33.96	-0.1416	-0.05908	-0.13232	-0.16895			35.04	1.25537	1.12402	3.15723	3.96826	9.52051
	43.04	0.401367	0.403809	1.18799	2.04785	4.89014			31.54	5.44531	5.75879	6.34766	7.28711	8.47852			-33.86	-0.16309	-0.07471	-0.14014	-0.17481			35.14	1.25146	1.1123	3.15918	3.9585	9.51465
	43.24	0.40918	0.411621	1.18604	2.0459	4.89795			31.64	5.45117	5.75879	6.34766	7.2832	8.47852			-33.76	-0.15332	-0.06885	-0.13818	-0.17676			35.24	1.25146	1.1123	3.16504	3.95654	9.52441
	43.34	0.407227	0.411621	1.18994	2.04004	4.90186			31.74	5.45605	5.74707	6.34375	7.2793	8.4668			-33.66	-0.14746	-0.09229	-0.14795	-0.17481			35.34	1.25146	1.10449	3.15723	3.94873	9.52637
	44.14	0.391602	0.409668	1.19775	2.04883	4.88623			31.84	5.4668	5.75098	6.35352	7.2793	8.47461			-33.56	-0.1582	-0.09424	-0.15869	-0.18652			35.44	1.25537	1.1084	3.16699	3.94287	9.52637
	44.24	0.405273	0.409668	1.20166	2.0498	4.88428			31.94	5.46094	5.76074	6.36523	7.27539	8.47461			-33.46	-0.15918	-0.08252	-0.1499	-0.17285			35.54	1.25146	1.1123	3.16699	3.93896	9.53027
	44.34	0.401367	0.414551	1.20557	2.0498	4.89014			32.04	5.47266	5.7666	6.36523	7.28125	8.47461			-33.36	-0.1582	-0.09326	-0.14893	-0.18359			35.64	1.2417	1.10254	3.1709	3.92139	9.53613
	44.44	0.405273	0.431152	1.20947	2.05957	4.89014			32.14	5.47656	5.78223	6.37305	7.2793	8.50195			-33.26	-0.15918	-0.08252	-0.15381	-0.16895			35.74	1.24561	1.10254	3.18652	3.92725	9.53418
	44.54	0.411133	0.421387	1.20947	2.05957	4.89404			32.24	5.48242	5.77637	6.37109	7.2832	8.50781			-33.16	-0.15137	-0.07666	-0.14795	-0.17383			35.84	1.23975	1.09277	3.1748	3.91748	9.53809
	45.04	0.432617	0.41748	1.2251	2.06152	4.90186			32.34	5.48633	5.76855	6.38086	7.28223	8.5			-33.06	-0.16309	-0.08643	-0.15772	-0.17676			35.94	1.22998	1.08105	3.17871	3.90771	9.53418
	45.14	0.422852	0.41748	1.22119	2.06543	4.90576			32.44	5.48047	5.77441	6.375	7.28516	8.50586			-32.96	-0.16113	-0.07666	-0.14795	-0.17481			36.04	1.23584	1.09668	3.18652	3.90771	9.5459
	45.24	0.426758	0.433105	1.23096	2.08105	4.91162			32.54	5.48047	5.77832	6.375	7.28613	8.50586			-32.86	-0.17285	-0.0874	-0.15772	-0.17481			36.14	1.25146	1.10254	3.19629	3.91162	9.5459
	45.34	0.436523	0.425293	1.2251	2.08105	4.91162			32.64	5.49609	5.78027	6.38672	7.27246	8.51758			-32.76	-0.15723	-0.08252	-0.15772	-0.17285			36.24	1.24951	1.10254	3.19629	3.91748	9.55957
	45.44	0.438477	0.437012	1.23682	2.09082	4.90576			32.74	5.50586	5.77051	6.37891	7.29102	8.52148			-32.66	-0.15918	-0.08643	-0.14795	-0.1709			36.34	1.24365	1.11621	3.19824	3.91748	9.56348
	45.64	0.442383	0.435059	1.23584	2.09473	4.89502			32.84	5.51172	5.78027	6.38965	7.2832	8.52734			-32.56	-0.15918	-0.08252	-0.14795	-0.1709			36.44	1.25146	1.11426	3.19629	3.91162	9.56543
	45.74	0.436523	0.440918	1.24268	2.10059	4.90186			32.94	5.49219	5.7666	6.38867	7.28906	8.52539			-32.46	-0.1709	-0.09229	-0.15186	-0.17481			36.54	1.25146	1.1123	3.19629	3.91748	9.56543
	45.84	0.442383	0.444824	1.24658	2.10059	4.90576			33.04	5.49219	5.75488	6.38867	7.26172	8.53711			-32.36	-0.17285	-0.08447	-0.15381	-0.17676			36.64	1.24951	1.1123	3.19629	3.91748	9.57519
	45.94	0.436523	0.450684	1.25244	2.10059	4.90186			33.14	5.5	5.77051	6.38086	7.26953	8.52539			-32.26	-0.1709	-0.08252	-0.17139	-0.18262			36.74	1.25342	1.12598	3.19434	3.92139	9.5791
	46.14	0.44043	0.455566	1.25244	2.1084	4.90576			33.24	5.5	5.78027	6.39063	7.26563	8.5293			-32.16	-0.17676	-0.07666	-0.16748	-0.17871			36.84	1.26123	1.12402	3.20605	3.93896	9.59277
	46.24	0.455078	0.462402	1.25635	2.1084	4.91553			33.34	5.51172	5.78613	6.39648	7.26367	8.54688			-32.06	-0.16895	-0.07861	-0.16553	-0.18066			36.94	1.25732	1.11816	3.20605	3.93701	9.59473
	46.34	0.458008	0.452637	1.2583	2.1084	4.91748			33.44	5.51172	5.78613	6.40039	7.28125	8.54688			-31.96	-0.16895	-0.07861	-0.15283	-0.1709			37.04	1.25146	1.12207	3.20605	3.92725	9.59473
	46.44	0.459961	0.456543	1.27002	2.1123	4.91553			33.54	5.52441	5.7959	6.41113	7.26953	8.55176			-31.86	-0.1709	-0.08252	-0.16943	-0.17481			37.14	1.24951	1.11621	3.19629	3.91748	9.58496
	46.54	0.458008	0.458496	1.27783	2.11426	4.90967			33.64	5.53125	5.82129	6.41016	7.27441	8.55859			-31.76	-0.15723	-0.07861	-0.1499	-0.16895			37.24	1.25342	1.12598	3.2041	3.92725	9.58496
	46.84	0.458008	0.462402	1.28174	2.11035	4.91553			33.74	5.53125	5.80957	6.41016	7.28516	8.56641			-31.66	-0.16309	-0.08838	-0.15967	-0.16504			37.34	1.26123	1.13184	3.20605	3.93115	9.59668
	46.94	0.454102	0.452637	1.28564	2.11426	4.91162			33.84	5.53516	5.80957	6.40234	7.29102	8.56641			-31.56	-0.15234	-0.08838	-0.1499	-0.16406			37.44	1.25537	1.12109	3.21387	3.93115	9.59375
	47.04	0.448242	0.446777	1.28174	2.11035	4.90576			33.94	5.54102	5.80957	6.4082	7.2793	8.56641			-31.46	-0.14551	-0.07764	-0.146	-0.1709			37.54	1.27002	1.13965	3.23145	3.93311	9.62207
	47.14	0.463867	0.452637	1.2915	2.11035	4.92139			34.04	5.54492	5.81738	6.41211	7.2793	8.57031			-31.36	-0.1377	-0.08838	-0.13818	-0.1709			37.64	1.26123	1.12402	3.21582	3.93213	9.60645
	47.24	0.452148	0.446777	1.29541	2.11035	4.91553			34.14	5.53906	5.81738	6.41016	7.2832	8.57617			-31.26	-0.1543	-0.09912	-0.14893	-0.17188			37.74	1.26514	1.1377	3.21875	3.93701	9.61035
	47.34	0.46582	0.466309	1.30127	2.11035	4.93115			34.24	5.53906	5.81738	6.43164	7.28125	8.58398			-31.16	-0.1416	-0.09814	-0.15186	-0.1709			37.84	1.28271	1.13379	3.22754	3.94287	9.61816
	47.44	0.47168	0.472168	1.31104	2.125	4.93115			34.34	5.54297	5.8291	6.4375	7.26953	8.58789			-31.06	-0.15723	-0.10205	-0.16748	-0.18262			37.94	1.27881	1.13379	3.22363	3.94873	9.62207
	47.54	0.47168	0.48584	1.31494	2.12988	4.93115			34.44	5.55078	5.8252	6.4375	7.26563	8.5918			-30.96	-0.15137	-0.10791	-0.16748	-0.19238			38.04	1.29053	1.15332	3.22754	3.9585	9.62598
	47.64	0.461914	0.478027	1.31689	2.12598	4.92725			34.54	5.5625	5.82324	6.45703	7.26758	8.58984			-30.86	-0.16309	-0.09814	-0.15772	-0.19824			38.14	1.29248	1.15918	3.23144	3.9624	9.63769
	47.74	0.475586	0.474121	1.32471	2.12793	4.93018			34.64	5.55469	5.82129	6.45313	7.26953	8.59961			-30.76	-0.15918	-0.10791	-0.15772	-0.2002			38.24	1.28662	1.15332	3.22754	3.9585	9.62793
	48.44	0.481445	0.491699	1.33838	2.12598	4.95068			34.74	5.56055	5.82715	6.45117	7.26953	8.60547			-30.66	-0.16113	-0.10205	-0.17139	-0.2041			38.34	1.31201	1.17676	3.2373	3.97217	9.64746
	48.54	0.493164	0.497559	1.33838	2.13574	4.9624			34.84	5.55273	5.82324	6.44922	7.26953	8.59766			-30.56	-0.16699	-0.10205	-0.17725	-0.2002			38.44	1.31201	1.18262	3.2373	3.97803	9.64551
	48.64	0.491211	0.497559	1.34814	2.14551	4.95068			34.94	5.54492	5.82129	6.44629	7.26172	8.60547			-30.46	-0.17676	-0.11768	-0.19092	-0.21191			38.54	1.31006	1.17285	3.23535	3.97998	9.65527
	48.74	0.508789	0.499512	1.35986	2.14746	4.96826			35.04	5.55468	5.81933	6.45898	7.26563	8.625			-30.36	-0.17676	-0.11768	-0.18311	-0.2041			38.64	1.29834	1.16308	3.22363	3.97412	9.65723
	48.84	0.493164	0.48584	1.34229	2.14551	4.9624			35.14	5.54883	5.80762	6.46289	7.27148	8.625			-30.26	-0.17676	-0.10596	-0.17725	-0.20313			38.74	1.30225	1.16309	3.21191	3.98193	9.66699
	48.94	0.487305	0.491699	1.34229	2.1416	4.95654			35.24	5.55273	5.81152	6.48047	7.25977	8.62891			-30.16	-0.18262	-0.12744	-0.19287	-0.21191			38.84	1.30225	1.17285	3.21777	3.98779	9.6709
	49.04	0.506836	0.495605	1.35596	2.15527	4.97217			35.34	5.55859	5.80566	6.47852	7.26758	8.61523			-30.06	-0.17285	-0.11768	-0.18506	-0.20801			38.94	1.30615	1.17285	3.22559	3.9917	9.68652
	49.24	0.50293	0.505371	1.36572	2.15332	4.97217			35.44	5.55078	5.80957	6.47461	7.26758	8.62793			-29.96	-0.1709	-0.11768	-0.17725	-0.20606			39.04	1.31006	1.16699	3.21973	3.98584	9.68652
	49.34	0.506836	0.501465	1.37158	2.15918	4.97705			35.54	5.5625	5.80762	6.48242	7.25977	8.63379			-29.86	-0.17676	-0.11182	-0.17725	-0.20996			39.14	1.31201	1.18262	3.22754	3.98779	9.70019
	49.44	0.512695	0.497559	1.36768	2.16016	4.97803			35.64	5.56055	5.81738	6.49805	7.26367	8.6416			-29.76	-0.17676	-0.12354	-0.18799	-0.20996			39.24	1.31201	1.17285	3.23145	3.99268	9.69629
	49.54	0.512695	0.496582	1.37158	2.1709	4.97607			35.74	5.54492	5.80566	6.48633	7.2793	8.6123			-29.66	-0.17676	-0.12256	-0.18897	-0.20996			39.34	1.31201	1.18262	3.23145	3.99951	9.70215
	49.64	0.516602	0.493652	1.36572	2.16504	4.98193			35.84	5.54297	5.79785	6.49023	7.25977	8.61719			-29.56	-0.18652	-0.13721	-0.19873	-0.20996			39.44	1.31006	1.18262	3.21582	3.99756	9.7002
	49.74	0.522461	0.497559	1.38135	2.1709	4.98584			35.94	5.54199	5.82031	6.48926	7.25977	8.6084			-29.46	-0.18848	-0.1294	-0.19482	-0.21582			39.54	1.32178	1.18652	3.22168	4.00342	9.71777
	49.84	0.522461	0.503418	1.37549	2.1748	4.9917			36.04	5.55273	5.81152	6.49219	7.2627	8.60059			-29.36	-0.17773	-0.11572	-0.19678	-0.21777			39.64	1.32568	1.19238	3.22754	4.00928	9.71972
	49.94	0.525391	0.51709	1.38135	2.18066	4.99561			36.14	5.55273	5.8291	6.50586	7.26563	8.61914			-29.26	-0.17871	-0.10986	-0.18897	-0.21191			39.74	1.32178	1.1875	3.21582	4.00342	9.71582
	50.04	0.517578	0.508301	1.37646	2.16992	4.99658			36.24	5.54492	5.81738	6.50391	7.27148	8.61914			-29.16	-0.17871	-0.11377	-0.1792	-0.2041			39.84	1.30811	1.18066	3.20605	3.99365	9.71191
	50.14	0.516602	0.51709	1.37549	2.18457	5.00146			36.34	5.53906	5.79785	6.48633	7.27148	8.5957			-29.06	-0.17481	-0.11572	-0.16943	-0.20606			39.94	1.3042	1.17676	3.20605	3.9917	9.70996
	50.24	0.512695	0.515137	1.38135	2.18066	4.99561			36.44	5.54688	5.79004	6.49023	7.25977	8.59961			-28.96	-0.16895	-0.11963	-0.1792	-0.21387			40.04	1.31006	1.17676	3.2002	3.98779	9.71582
	50.34	0.526367	0.530762	1.38525	2.18262	5.01123			36.54	5.57031	5.80761	6.51953	7.27148	8.60937			-28.86	-0.16309	-0.12158	-0.1792	-0.22363			40.14	1.30225	1.1748	3.20801	3.97998	9.70605
	50.44	0.522461	0.520996	1.37939	2.17871	5.01514			36.64	5.55859	5.80762	6.51563	7.28125	8.60938			-28.76	-0.16504	-0.12549	-0.16553	-0.23145			40.24	1.29834	1.1748	3.21582	3.97803	9.71191
	50.54	0.536133	0.534668	1.37939	2.18262	5.03076			36.74	5.55078	5.80371	6.50391	7.27734	8.60742			-28.66	-0.15918	-0.11963	-0.15967	-0.22168			40.34	1.29248	1.1748	3.21582	3.97803	9.70605
	50.64	0.522461	0.530762	1.38037	2.18457	5.02686			36.84	5.54395	5.79785	6.50977	7.27344	8.59961			-28.56	-0.15332	-0.12354	-0.15381	-0.21973			40.44	1.29053	1.16699	3.21094	3.97217	9.71094
	50.74	0.532227	0.530762	1.38135	2.17871	5.0249			36.94	5.54688	5.80176	6.51367	7.2793	8.5918			-28.46	-0.16504	-0.13525	-0.16553	-0.22949			40.54	1.29443	1.16309	3.21289	3.97803	9.72754
	50.84	0.532227	0.530762	1.39111	2.17871	5.03662			37.04	5.55273	5.80761	6.51171	7.27148	8.59765			-28.36	-0.15332	-0.1294	-0.15967	-0.21973			40.64	1.30225	1.15918	3.20117	3.9585	9.7334
	50.94	0.532227	0.524902	1.38135	2.16895	5.03467			37.14	5.55664	5.80762	6.50586	7.27734	8.59766			-28.26	-0.14746	-0.1333	-0.16357	-0.20996			40.74	1.29834	1.16113	3.19434	3.95459	9.72363
	51.04	0.530273	0.526855	1.38135	2.16992	5.03662			37.24	5.55859	5.80371	6.50586	7.27734	8.58984			-28.16	-0.15918	-0.15088	-0.18115	-0.22656			40.84	1.29248	1.15332	3.19238	3.95264	9.72754
	51.14	0.524414	0.51123	1.37158	2.1709	5.03076			37.34	5.55859	5.82715	6.50195	7.27734	8.58398			-28.06	-0.15918	-0.14893	-0.16943	-0.22168			40.94	1.28076	1.1377	3.18848	3.94873	9.71777
	51.24	0.540039	0.51416	1.38135	2.1748	5.04443			37.44	5.56445	5.83887	6.5	7.28516	8.60156			-27.96	-0.15332	-0.13916	-0.16943	-0.22168			41.04	1.28564	1.14355	3.19238	3.94873	9.72168
	51.34	0.53125	0.51709	1.37158	2.16895	5.04639			37.54	5.56445	5.83887	6.50391	7.2959	8.59961			-27.86	-0.1543	-0.13428	-0.16455	-0.20703			41.14	1.29443	1.14355	3.19824	3.94873	9.74316
	51.44	0.541992	0.515137	1.37158	2.17871	5.04053			37.64	5.55273	5.83887	6.50586	7.30273	8.5957			-27.76	-0.14746	-0.11768	-0.15772	-0.19043			41.24	1.29053	1.14355	3.2041	3.95459	9.74512
	51.54	0.532227	0.51123	1.37549	2.17285	5.04541			37.74	5.56445	5.83105	6.50977	7.30273	8.59961			-27.66	-0.1416	-0.11182	-0.14795	-0.19434			41.34	1.2749	1.13379	3.19238	3.93408	9.72754
	51.64	0.540039	0.513184	1.3833	2.18066	5.04834			37.84	5.5625	5.83691	6.52344	7.31445	8.59766			-27.56	-0.14551	-0.11572	-0.14795	-0.19043			41.44	1.27686	1.13867	3.19824	3.94092	9.74121
	51.74	0.524414	0.51709	1.37158	2.1748	5.03662			37.94	5.56641	5.8291	6.51758	7.3125	8.60156			-27.46	-0.1416	-0.11182	-0.14795	-0.17871			41.54	1.28271	1.14551	3.19629	3.93896	9.74707
	51.84	0.52832	0.536621	1.37158	2.19043	5.05225			38.04	5.57227	5.8418	6.52246	7.30469	8.5957			-27.36	-0.14746	-0.11768	-0.15772	-0.19043			41.64	1.28467	1.13965	3.20801	3.94482	9.74902
	51.94	0.53418	0.532715	1.36572	2.18457	5.05225			38.14	5.57227	5.84863	6.5293	7.30664	8.58789			-27.26	-0.1416	-0.10791	-0.15772	-0.19043			41.74	1.27393	1.14453	3.19727	3.93604	9.74414
	52.04	0.538086	0.536621	1.37549	2.19043	5.05615			38.24	5.57617	5.84863	6.52148	7.30859	8.58789			-27.16	-0.14746	-0.10791	-0.15772	-0.18457			41.84	1.271	1.13379	3.18652	3.92334	9.73535
	52.14	0.540039	0.538574	1.36768	2.18066	5.05811			38.34	5.58594	5.86426	6.54297	7.30859	8.5918			-27.06	-0.13379	-0.09424	-0.14795	-0.17676			41.94	1.26514	1.12793	3.17676	3.91748	9.72949
	52.24	0.53418	0.536621	1.36182	2.18066	5.05615			38.44	5.5918	5.87012	6.54883	7.32422	8.59375			-26.96	-0.12598	-0.08838	-0.13818	-0.17285			42.04	1.271	1.12207	3.18848	3.92725	9.74512
	52.34	0.526367	0.54248	1.35693	2.18457	5.06201			38.54	5.5957	5.88184	6.55273	7.3418	8.59961			-26.86	-0.12012	-0.07666	-0.13818	-0.16895			42.14	1.26513	1.13183	3.20801	3.93115	9.74512
	52.44	0.538086	0.54248	1.36377	2.18652	5.06201			38.64	5.60156	5.8877	6.5625	7.34961	8.60156			-26.76	-0.12207	-0.07275	-0.13232	-0.16504			42.24	1.271	1.11816	3.20605	3.9292	9.74707
	52.54	0.526367	0.530762	1.35205	2.17383	5.06592			38.74	5.60156	5.8877	6.55664	7.34961	8.61523			-26.66	-0.11621	-0.05713	-0.12647	-0.15918			42.34	1.26709	1.12793	3.21191	3.93896	9.75098
	52.64	0.545898	0.54541	1.36572	2.19043	5.07178			38.84	5.61719	5.8916	6.56445	7.34961	8.60742			-26.56	-0.12305	-0.06299	-0.12842	-0.15527			42.44	1.26123	1.12598	3.20605	3.94678	9.74902
	52.74	0.541992	0.54248	1.36572	2.18457	5.07568			38.94	5.62891	5.88965	6.56445	7.35352	8.61328			-26.46	-0.12988	-0.07861	-0.12842	-0.1709			42.54	1.25537	1.12598	3.19824	3.93701	9.75488
	52.84	0.536133	0.536621	1.36572	2.18457	5.07568			39.04	5.63281	5.89941	6.56836	7.35156	8.62891			-26.36	-0.12402	-0.07471	-0.12842	-0.15527			42.64	1.26123	1.13379	3.2207	3.9331	9.75683
	52.94	0.555664	0.552246	1.37158	2.19043	5.09131			39.14	5.62109	5.89941	6.57227	7.36133	8.61719			-26.26	-0.11816	-0.06689	-0.11865	-0.15332			42.74	1.26123	1.12988	3.22363	3.94482	9.7666
	53.04	0.546875	0.541504	1.36084	2.17969	5.07666			39.24	5.62891	5.89551	6.57813	7.34961	8.62109			-26.16	-0.10254	-0.05127	-0.11865	-0.14941			42.84	1.25146	1.10645	3.20801	3.92725	9.7666
	53.14	0.535156	0.530762	1.354	2.17871	5.07471			39.34	5.62109	5.87793	6.5625	7.34961	8.61133			-26.06	-0.10449	-0.05322	-0.11475	-0.13965			42.94	1.26123	1.1123	3.21191	3.93115	9.76465
	53.24	0.541992	0.544434	1.35986	2.18262	5.07959			39.44	5.63672	5.89746	6.57227	7.34961	8.62109			-25.96	-0.08887	-0.0376	-0.09717	-0.13965			43.04	1.26514	1.11719	3.22559	3.93701	9.77441
	53.34	0.541992	0.536621	1.35986	2.18457	5.07959			39.54	5.63086	5.90136	6.58203	7.36523	8.62695			-25.86	-0.10059	-0.06006	-0.10889	-0.1377			43.14	1.26709	1.12012	3.22363	3.93506	9.78223
	53.44	0.541992	0.530762	1.35986	2.18262	5.08936			39.64	5.61914	5.89551	6.56445	7.35938	8.61914			-25.76	-0.10059	-0.06104	-0.09912	-0.125			43.24	1.26611	1.11816	3.22168	3.9292	9.78125
	53.54	0.536133	0.534668	1.35303	2.17871	5.08936			39.74	5.62305	5.89551	6.56445	7.34766	8.625			-25.66	-0.08887	-0.06104	-0.09912	-0.13184			43.34	1.27295	1.12402	3.22168	3.93115	9.79785
	53.64	0.541992	0.526855	1.3501	2.17871	5.07568			39.84	5.64063	5.91113	6.57617	7.33984	8.63672			-25.56	-0.10254	-0.06885	-0.11377	-0.1416			43.44	1.25732	1.13379	3.23145	3.94287	9.79395
	53.74	0.530273	0.524902	1.34424	2.16699	5.07373			39.94	5.65234	5.92871	6.58789	7.35742	8.6416			-25.46	-0.1084	-0.05518	-0.10498	-0.1377			43.54	1.26318	1.13574	3.21777	3.93896	9.80176
	53.84	0.532227	0.536621	1.35205	2.17285	5.09131			40.04	5.63672	5.91699	6.57617	7.36133	8.64453			-25.36	-0.09863	-0.05322	-0.09912	-0.12207			43.64	1.27295	1.13379	3.22168	3.9292	9.81738
	53.94	0.532227	0.538574	1.34229	2.1748	5.07764			40.14	5.64063	5.92871	6.5918	7.3457	8.65625			-25.26	-0.09766	-0.0542	-0.08447	-0.11719			43.74	1.27686	1.1377	3.21777	3.93115	9.82715
	54.04	0.532227	0.534668	1.34619	2.17383	5.08545			40.24	5.63281	5.9209	6.58984	7.3623	8.64844			-25.16	-0.09668	-0.0376	-0.07178	-0.11231			43.84	1.27881	1.13965	3.22168	3.94287	9.82715
	54.14	0.532227	0.526855	1.34229	2.18066	5.07764			40.34	5.63379	5.92676	6.58594	7.36133	8.64844			-25.06	-0.08301	-0.04541	-0.07568	-0.09668			43.94	1.27881	1.13965	3.22168	3.93896	9.83887
	54.24	0.532227	0.525879	1.34619	2.18066	5.08154			40.44	5.63281	5.92676	6.59766	7.36523	8.64844			-24.96	-0.08105	-0.03369	-0.06982	-0.09082			44.04	1.27881	1.14941	3.2334	3.94482	9.84863
	54.34	0.522461	0.532715	1.34229	2.18066	5.07568			40.54	5.63281	5.92676	6.58594	7.37109	8.64844			-24.86	-0.08691	-0.05908	-0.07764	-0.10059			44.14	1.28662	1.14355	3.21777	3.93701	9.85644
	54.44	0.522461	0.532715	1.34033	2.18066	5.0874			40.64	5.62109	5.91504	6.59766	7.35938	8.64063			-24.76	-0.09277	-0.05322	-0.07373	-0.09668			44.24	1.29248	1.1377	3.22949	3.95166	9.87012
	54.54	0.522461	0.546387	1.354	2.18066	5.09521			40.74	5.625	5.91895	6.58984	7.35938	8.64648			-24.66	-0.09082	-0.0415	-0.07178	-0.09277			44.34	1.28662	1.14551	3.24707	3.96436	9.88184
	54.64	0.532227	0.562012	1.35596	2.18066	5.09717			40.84	5.62305	5.91699	6.58105	7.36328	8.63867			-24.56	-0.09277	-0.04346	-0.07373	-0.08496			44.44	1.28857	1.14355	3.24707	3.96631	9.88379
	54.74	0.522461	0.556152	1.34521	2.18066	5.09131			40.94	5.62305	5.91699	6.59961	7.34961	8.63867			-24.46	-0.09082	-0.02979	-0.06982	-0.08496			44.54	1.28271	1.13379	3.24707	3.96045	9.87793
	54.84	0.536133	0.562012	1.35205	2.18457	5.09521			41.04	5.61133	5.90527	6.5918	7.34961	8.63867			-24.36	-0.08691	-0.02197	-0.06006	-0.08496			44.64	1.28662	1.12793	3.25195	3.95849	9.8916
	54.94	0.530273	0.556152	1.34619	2.19043	5.09131			41.14	5.62695	5.91309	6.60938	7.3457	8.64258			-24.26	-0.08301	-0.02393	-0.06006	-0.09668			44.74	1.29639	1.11621	3.24707	3.9624	9.88574
	55.04	0.53125	0.562012	1.35205	2.18848	5.09717			41.24	5.63867	5.9248	6.61133	7.34375	8.6543			-24.16	-0.0918	-0.01807	-0.05811	-0.09082			44.84	1.2876	1.10938	3.23828	3.9458	9.88672
	55.14	0.522461	0.565918	1.34619	2.18848	5.08154			41.34	5.65039	5.93652	6.62891	7.36133	8.66602			-24.06	-0.09473	-0.01807	-0.0542	-0.09082			44.94	1.28076	1.10254	3.2373	3.93896	9.88574
	55.24	0.523438	0.566895	1.36279	2.18945	5.08057			41.44	5.6543	5.9248	6.64063	7.37109	8.6582			-23.96	-0.09277	-0.01807	-0.05811	-0.09863			45.04	1.271	1.08594	3.23145	3.94287	9.88965
	55.34	0.512695	0.554199	1.35205	2.18848	5.08447			41.54	5.66016	5.92871	6.63867	7.36719	8.6543			-23.86	-0.09668	-0.02979	-0.05029	-0.09082			45.14	1.2749	1.09277	3.23535	3.94678	9.90527
	55.44	0.512695	0.560059	1.36572	2.18848	5.09131			41.64	5.66016	5.92285	6.64453	7.36328	8.6543			-23.76	-0.09277	-0.02979	-0.04443	-0.09473			45.24	1.2749	1.10254	3.23535	3.94678	9.91113
	55.54	0.50293	0.556152	1.35986	2.17871	5.06787			41.74	5.66406	5.93457	6.64453	7.36914	8.6543			-23.66	-0.09473	-0.0376	-0.0542	-0.10645			45.34	1.271	1.09863	3.2373	3.93896	9.91016
	55.64	0.50293	0.555176	1.36963	2.19336	5.06592			41.84	5.66992	5.93457	6.65625	7.36133	8.66992			-23.56	-0.08789	-0.02783	-0.03369	-0.08594			45.44	1.26123	1.10059	3.2334	3.93506	9.92285
	55.74	0.491211	0.552246	1.35986	2.18652	5.06787			41.94	5.66992	5.93457	6.66016	7.37891	8.67578			-23.46	-0.08105	-0.02783	-0.03076	-0.0791			45.54	1.26123	1.08691	3.23145	3.92725	9.92676
	55.84	0.500977	0.565918	1.35986	2.18066	5.06592			42.04	5.67383	5.92773	6.66602	7.37891	8.67578			-23.36	-0.08691	-0.03174	-0.05029	-0.0918			45.64	1.26123	1.08301	3.22558	3.92139	9.9209
	55.94	0.514648	0.571777	1.36475	2.18457	5.07178			42.14	5.66797	5.92969	6.66992	7.37109	8.67969			-23.26	-0.08496	-0.0376	-0.03271	-0.08496			45.74	1.25049	1.08301	3.21582	3.92725	9.92285
	56.04	0.506836	0.562012	1.37158	2.18652	5.07178			42.24	5.67188	5.93164	6.67969	7.38867	8.68945			-23.16	-0.08691	-0.03564	-0.02783	-0.07129			45.84	1.24756	1.06738	3.20215	3.91357	9.91309
	56.14	0.510742	0.575684	1.37158	2.18066	5.07178			42.34	5.66016	5.93848	6.66016	7.38867	8.66602			-23.06	-0.08691	-0.04346	-0.02881	-0.08105			45.94	1.24756	1.06348	3.20801	3.91943	9.91699
	56.24	0.500977	0.567871	1.36182	2.1709	5.07178			42.44	5.66406	5.9541	6.67773	7.37695	8.67773			-22.96	-0.09668	-0.04346	-0.03857	-0.09082			46.04	1.25342	1.06738	3.20996	3.92139	9.9209
	56.34	0.500977	0.575684	1.36182	2.18457	5.06982			42.54	5.66992	5.94434	6.66602	7.40527	8.67383			-22.86	-0.09668	-0.04736	-0.05225	-0.10059			46.14	1.2417	1.0498	3.20215	3.91357	9.92285
	56.44	0.487305	0.565918	1.36182	2.18652	5.06982			42.64	5.66602	5.94434	6.6709	7.38867	8.68945			-22.76	-0.09668	-0.05127	-0.04834	-0.10254			46.24	1.2417	1.04199	3.2002	3.9126	9.91699
	56.54	0.481445	0.563965	1.36572	2.18262	5.06982			42.74	5.67871	5.95313	6.6748	7.38867	8.7041			-22.66	-0.09277	-0.06494	-0.06006	-0.10645			46.34	1.23193	1.03223	3.20215	3.90576	9.91309
	56.64	0.483398	0.581543	1.3833	2.19629	5.07178			42.84	5.67969	5.96387	6.67383	7.39746	8.6875			-22.56	-0.07715	-0.05908	-0.05225	-0.09473			46.44	1.22412	1.02441	3.19238	3.89404	9.89941
	56.74	0.483398	0.571777	1.37158	2.18457	5.06592			42.94	5.69141	5.96582	6.67969	7.39648	8.6875			-22.46	-0.07715	-0.05908	-0.06787	-0.11035			46.54	1.22217	1.01074	3.19238	3.896	9.90332
	56.84	0.469727	0.562988	1.35791	2.17676	5.06787			43.04	5.68457	5.96582	6.67188	7.39063	8.69531			-22.36	-0.07324	-0.05713	-0.0542	-0.10059			46.64	1.2124	1.0166	3.19629	3.89404	9.90723
	56.94	0.463867	0.577637	1.36572	2.1709	5.06592			43.14	5.68359	5.95801	6.66992	7.39844	8.69141			-22.26	-0.06738	-0.05713	-0.06201	-0.11426			46.74	1.20166	1.00781	3.18652	3.89502	9.88672
	57.04	0.467773	0.583496	1.36572	2.16113	5.06201			43.24	5.69531	5.96582	6.67773	7.38281	8.68945			-22.16	-0.08398	-0.05908	-0.06006	-0.11035			46.84	1.19482	0.996094	3.17676	3.88037	9.88574
	57.14	0.47168	0.587402	1.38135	2.16504	5.06201			43.34	5.70508	5.97754	6.67773	7.39844	8.69531			-22.06	-0.0791	-0.06299	-0.05225	-0.11035			46.94	1.20068	1.00488	3.18066	3.88818	9.90137
	57.24	0.482422	0.589355	1.38232	2.17676	5.05811			43.44	5.70313	5.97754	6.67773	7.41016	8.70703			-21.96	-0.0791	-0.05908	-0.06201	-0.10449			47.04	1.20459	1.00684	3.18652	3.89209	9.91699
	57.34	0.477539	0.577637	1.37354	2.16113	5.05713			43.54	5.71484	5.97754	6.67773	7.40234	8.69531			-21.86	-0.0791	-0.06885	-0.06787	-0.12012			47.14	1.21631	1.01269	3.18652	3.89404	9.91504
	57.44	0.483398	0.593262	1.38721	2.1748	5.06201			43.64	5.72461	5.97363	6.69336	7.4082	8.69922			-21.76	-0.06934	-0.06689	-0.06787	-0.12402			47.24	1.21533	1.00293	3.18652	3.89209	9.91504
	57.54	0.482422	0.592285	1.38818	2.17578	5.0708			43.74	5.70508	5.97949	6.67969	7.41602	8.67969			-21.66	-0.06934	-0.06104	-0.06299	-0.13477			47.34	1.22021	1.0166	3.18848	3.90576	9.9248
	57.64	0.481445	0.585449	1.38525	2.17285	5.06006			43.84	5.71094	5.97168	6.67969	7.41016	8.68555			-21.56	-0.06738	-0.06689	-0.07373	-0.13965			47.44	1.2124	1.02051	3.19238	3.89795	9.92285
	57.74	0.481445	0.597168	1.39111	2.17285	5.06592			43.94	5.72266	5.99707	6.69727	7.41016	8.69727			-21.46	-0.06738	-0.06104	-0.07178	-0.12402			47.54	1.20264	1.00684	3.18066	3.88818	9.90723
	57.84	0.481445	0.589355	1.39111	2.18164	5.06396			44.04	5.73438	5.99316	6.70898	7.41016	8.69727			-21.36	-0.06543	-0.07471	-0.07959	-0.1377			47.64	1.19873	1.00879	3.17285	3.88818	9.91504
	57.94	0.495117	0.593262	1.39502	2.18848	5.07959			44.14	5.73242	5.9834	6.69336	7.41016	8.68945			-21.26	-0.06934	-0.06006	-0.07959	-0.11816			47.74	1.19678	1.00684	3.1709	3.89795	9.9248
	58.04	0.487305	0.589355	1.38525	2.18848	5.06592			44.24	5.74414	6.00098	6.69922	7.40625	8.70117			-21.16	-0.06348	-0.06299	-0.0835	-0.11231			47.84	1.20654	1.01855	3.1709	3.89209	9.93066
	58.14	0.485352	0.594238	1.3833	2.17871	5.0542			44.34	5.74219	5.99902	6.68164	7.42383	8.69238			-21.06	-0.06934	-0.06885	-0.07959	-0.10645			47.94	1.19287	1.00879	3.15723	3.8833	9.92676
	58.24	0.489258	0.599121	1.38721	2.18066	5.05811			44.44	5.72266	5.99512	6.67578	7.42188	8.6875			-20.96	-0.05762	-0.05908	-0.07959	-0.09473			48.04	1.19873	1.0127	3.15723	3.88623	9.93652
	58.34	0.489258	0.593262	1.38135	2.18066	5.05225			44.54	5.74023	6.01074	6.6875	7.40234	8.69921			-20.86	-0.0625	-0.05811	-0.06689	-0.10547			48.14	1.19678	1.01758	3.15723	3.88428	9.93652
	58.44	0.475586	0.593262	1.38525	2.18066	5.05225			44.64	5.73242	6.0166	6.69238	7.43164	8.69922			-20.76	-0.05762	-0.05908	-0.06787	-0.10059			48.24	1.20264	1.02441	3.15918	3.89209	9.94629
	58.54	0.491211	0.597168	1.39111	2.18066	5.05615			44.74	5.7207	6.00879	6.67969	7.41992	8.69141			-20.66	-0.04785	-0.04736	-0.05811	-0.09668			48.34	1.2124	1.01074	3.16309	3.896	9.95898
	58.64	0.491211	0.603027	1.40088	2.18457	5.06201			44.84	5.7207	6.00098	6.66797	7.41992	8.69727			-20.56	-0.03418	-0.04736	-0.05811	-0.09082			48.44	1.22217	1.01855	3.17676	3.90381	9.96777
	58.74	0.491211	0.593262	1.39111	2.18652	5.05811			44.94	5.72461	6.00684	6.67188	7.41602	8.69727			-20.46	-0.04199	-0.06104	-0.05615	-0.10449			48.54	1.22217	1.02051	3.16797	3.90576	9.97363
	58.84	0.496094	0.603027	1.39111	2.18457	5.0542			45.04	5.71484	6.00684	6.6543	7.41797	8.69336			-20.36	-0.03223	-0.05713	-0.05615	-0.09863			48.64	1.22217	1.02832	3.16699	3.90967	9.98144
	58.94	0.512695	0.60498	1.396	2.18848	5.06006			45.14	5.70898	6.00684	6.63672	7.41406	8.67578			-20.26	-0.04004	-0.06689	-0.06592	-0.1084			48.74	1.22607	1.02637	3.16309	3.92334	9.99902
	59.04	0.508789	0.606934	1.40869	2.19824	5.06006			45.24	5.71289	5.99512	6.62891	7.41211	8.66797			-20.16	-0.04199	-0.07666	-0.07275	-0.10059			48.84	1.23779	1.03027	3.15527	3.9292	10.0088
	59.14	0.506836	0.595215	1.39307	2.19824	5.06006			45.34	5.71875	6	6.63281	7.41797	8.67188			-20.06	-0.05762	-0.10303	-0.07471	-0.10059			48.94	1.23584	1.02832	3.15137	3.93311	10.0186
	59.24	0.512695	0.601074	1.39502	2.19824	5.06006			45.44	5.72656	5.99902	6.63086	7.40625	8.66992			-19.96	-0.04785	-0.09424	-0.05908	-0.09082			49.04	1.24658	1.03418	3.15723	3.94287	10.0283
	59.34	0.518555	0.616699	1.4126	2.2041	5.06689			45.54	5.74218	6.01269	6.64062	7.40234	8.6875			-19.86	-0.0498	-0.09229	-0.07959	-0.09863			49.14	1.25049	1.04492	3.1582	3.95557	10.0371
	59.44	0.524414	0.616699	1.40674	2.2002	5.07373			45.64	5.73047	6.00684	6.63281	7.41699	8.66406			-19.76	-0.05664	-0.09814	-0.07373	-0.09863			49.24	1.2417	1.04395	3.15723	3.95068	10.0361
	59.54	0.514648	0.618652	1.40869	2.19141	5.06396			45.74	5.73438	6.01074	6.63086	7.40039	8.6543			-19.66	-0.05371	-0.09814	-0.07764	-0.1084			49.34	1.2417	1.04785	3.16699	3.95264	10.042
	59.64	0.518555	0.616699	1.40674	2.20215	5.07373			45.84	5.7373	6.00879	6.64063	7.4043	8.6582			-19.56	-0.05957	-0.1001	-0.07959	-0.11035			49.44	1.2417	1.03613	3.15527	3.94678	10.0361
	59.74	0.53418	0.622559	1.4126	2.20605	5.07764			45.94	5.74805	6.00488	6.6543	7.40234	8.6543			-19.46	-0.05957	-0.10986	-0.08936	-0.11035			49.54	1.25342	1.04395	3.16699	3.94971	10.0439
	59.84	0.536133	0.622559	1.42627	2.21191	5.0874			46.04	5.74414	5.99316	6.63867	7.39844	8.64648			-19.36	-0.0498	-0.10791	-0.07959	-0.11133			49.64	1.2456	1.04394	3.16699	3.94873	10.0479
	59.94	0.537109	0.61084	1.42139	2.20117	5.08057			46.14	5.75391	5.99902	6.64258	7.39453	8.65039			-19.26	-0.04395	-0.09814	-0.07959	-0.1084			49.74	1.25146	1.05566	3.1709	3.95264	10.0459
	60.04	0.53418	0.620605	1.43018	2.2002	5.08936			46.24	5.77148	6.0166	6.66602	7.4043	8.65625			-19.16	-0.04688	-0.10303	-0.08447	-0.10547			49.84	1.25537	1.06152	3.1748	3.9585	10.0596
	60.14	0.540039	0.614746	1.42432	2.19238	5.0835			46.34	5.77148	6.02051	6.6582	7.42969	8.65625			-19.06	-0.0498	-0.09033	-0.08154	-0.09863			49.94	1.27881	1.06348	3.18262	3.97021	10.0732
	60.24	0.553711	0.624512	1.43018	2.20215	5.09326			46.44	5.7793	6.01855	6.66602	7.42188	8.67578			-18.96	-0.05371	-0.10303	-0.0874	-0.09082			50.04	1.27686	1.07324	3.18066	3.97998	10.0908
	60.34	0.549805	0.630371	1.42432	2.19824	5.09326			46.54	5.77929	6.0166	6.67773	7.42578	8.6875			-18.86	-0.03809	-0.10596	-0.07764	-0.07715			50.14	1.27686	1.06445	3.17285	3.97803	10.083
	60.44	0.55957	0.626465	1.42432	2.2041	5.1001			46.64	5.77148	6.0127	6.67578	7.42969	8.6875			-18.76	-0.03223	-0.09814	-0.06787	-0.05664			50.24	1.28076	1.07324	3.17969	3.99756	10.0967
	60.54	0.549805	0.614746	1.41846	2.19238	5.10107			46.74	5.7793	6.02246	6.67969	7.43359	8.69531			-18.66	-0.03809	-0.09814	-0.06787	-0.03809			50.34	1.271	1.06348	3.17676	3.98779	10.0811
	60.64	0.55957	0.630371	1.42334	2.20801	5.10107			46.84	5.79102	6.02441	6.67773	7.43555	8.70703			-18.56	-0.0459	-0.09814	-0.07373	-0.03906			50.44	1.26904	1.07129	3.18457	3.98584	10.083
	60.74	0.560547	0.620605	1.42627	2.19824	5.09717			46.94	5.79102	6.02441	6.67773	7.44922	8.70703			-18.46	-0.04004	-0.10205	-0.06787	-0.03027			50.54	1.26709	1.06934	3.17871	3.98389	10.0771
	60.84	0.567383	0.632324	1.4165	2.2002	5.09717			47.04	5.79492	6.02832	6.68359	7.44922	8.71484			-18.36	-0.04785	-0.10986	-0.06396	-0.03809			50.64	1.25732	1.05957	3.16895	3.97412	10.0771
	60.94	0.563477	0.626465	1.4126	2.19434	5.09717			47.14	5.78906	6.02637	6.67578	7.45703	8.70703			-18.26	-0.05273	-0.10986	-0.0542	-0.03223			50.74	1.24561	1.04785	3.16699	3.9624	10.0674
	61.04	0.563477	0.628418	1.42236	2.20605	5.09717			47.24	5.79395	6.03516	6.68555	7.45313	8.71191			-18.16	-0.05957	-0.12158	-0.04834	-0.02051			50.84	1.25146	1.05371	3.16113	3.97217	10.0771
	61.14	0.567383	0.620605	1.42041	2.20898	5.08936			47.34	5.79688	6.02832	6.69141	7.45215	8.72266			-18.06	-0.06152	-0.12158	-0.04346	-0.02441			50.94	1.26807	1.06543	3.18262	3.99951	10.0869
	61.24	0.573242	0.638184	1.43213	2.21777	5.09717			47.44	5.8125	6.03809	6.71289	7.45117	8.73828			-17.96	-0.07715	-0.12744	-0.04443	-0.03027			51.04	1.26221	1.0625	3.18359	3.99756	10.0859
	61.34	0.563477	0.624512	1.43213	2.2041	5.08545			47.54	5.8125	6.04199	6.71094	7.46094	8.73828			-17.86	-0.08691	-0.12842	-0.04248	-0.03027			51.14	1.26123	1.07129	3.18457	3.99756	10.085
	61.44	0.577148	0.640137	1.42627	2.21973	5.09521			47.64	5.80469	6.03613	6.70703	7.46094	8.72656			-17.76	-0.07813	-0.13037	-0.03955	-0.02344			51.24	1.26123	1.0752	3.18848	4.00146	10.0947
	61.54	0.571289	0.630371	1.43213	2.21387	5.10107			47.74	5.81445	6.02832	6.71484	7.44922	8.73438			-17.66	-0.06738	-0.11768	-0.03857	-0.01953			51.34	1.25146	1.0791	3.19238	3.99561	10.1074
	61.64	0.581055	0.630371	1.43408	2.22949	5.10498			47.84	5.82422	6.05469	6.73047	7.45313	8.75781			-17.56	-0.05664	-0.12158	-0.01904	-0.0166			51.44	1.25146	1.08691	3.18652	3.99951	10.1064
	61.74	0.581055	0.631348	1.44971	2.22949	5.10693			47.94	5.80859	6.0498	6.71875	7.45117	8.74609			-17.46	-0.05371	-0.13721	-0.0269	-0.01074			51.54	1.24561	1.09668	3.2002	4.00146	10.1162
	61.84	0.575195	0.632324	1.44482	2.21973	5.09521			48.04	5.80469	6.04199	6.72656	7.43945	8.75			-17.36	-0.04199	-0.13721	-0.0269	-0.01074			51.64	1.24756	1.09668	3.20019	4.00732	10.1162
	61.94	0.59082	0.632324	1.45166	2.2334	5.10107			48.14	5.83398	6.06738	6.75391	7.44727	8.7832			-17.26	-0.05762	-0.14697	-0.0181	-0.01465			51.74	1.24561	1.09766	3.19043	4.01318	10.1279
	62.04	0.581055	0.628418	1.44189	2.22559	5.10107			48.24	5.83203	6.06738	6.75977	7.47461	8.7832			-17.16	-0.0498	-0.14893	-0.0112	-0.01855			51.84	1.25146	1.10449	3.19629	4.02881	10.1318
	62.14	0.59082	0.626465	1.4458	2.22949	5.09912			48.34	5.82617	6.07129	6.76953	7.47266	8.78711			-17.06	-0.05566	-0.156	-0.00537	-0.03613			51.94	1.25537	1.1084	3.2002	4.02686	10.1475
	62.24	0.585938	0.622559	1.45166	2.2334	5.09424			48.44	5.83203	6.07129	6.77734	7.4707	8.78711			-16.96	-0.03418	-0.139	0.000488	-0.02051			52.04	1.26709	1.1123	3.21484	4.02686	10.1416
	62.34	0.592773	0.626465	1.45166	2.24316	5.10107			48.54	5.83594	6.08105	6.78125	7.47461	8.79883			-16.86	-0.03711	-0.14404	0.0112	-0.02441			52.14	1.25537	1.10449	3.20801	4.01904	10.1377
	62.44	0.59668	0.620605	1.45557	2.24902	5.09521			48.64	5.8418	6.08691	6.79102	7.47266	8.80859			-16.76	-0.03223	-0.13721	0.021973	-0.02246			52.24	1.26123	1.1084	3.22168	4.02295	10.1377
	62.54	0.608398	0.632324	1.46729	2.25098	5.11279			48.74	5.84961	6.08691	6.79688	7.47852	8.82617			-16.66	-0.03613	-0.13721	0.025879	-0.02246			52.34	1.25146	1.11816	3.22754	4.03076	10.1416
	62.64	0.600586	0.618652	1.46924	2.24121	5.09912			48.84	5.8457	6.08691	6.79297	7.47852	8.82227			-16.56	-0.03809	-0.13916	0.01416	-0.02441			52.44	1.25146	1.1084	3.21777	4.02783	10.1475
	62.74	0.608398	0.616699	1.46338	2.24316	5.09717			48.94	5.85547	6.09863	6.81055	7.47949	8.82813			-16.46	-0.03418	-0.13916	0.020996	-0.02051			52.54	1.26123	1.10645	3.21582	4.03857	10.1553
	62.84	0.602539	0.616699	1.46729	2.24902	5.10693			49.04	5.86914	6.10254	6.80859	7.49219	8.83594			-16.36	-0.02832	-0.13916	0.035645	-0.01758			52.64	1.26611	1.11426	3.22168	4.04443	10.1572
	62.94	0.606445	0.632324	1.4751	2.25391	5.11279			49.14	5.87305	6.1123	6.80859	7.50391	8.83984			-16.26	-0.03223	-0.13135	0.029785	-0.03809			52.74	1.27881	1.11035	3.22363	4.04639	10.167
	63.04	0.612305	0.622559	1.47119	2.25098	5.10693			49.24	5.84766	6.09082	6.79883	7.51367	8.83105			-16.16	-0.03613	-0.13721	0.0181	-0.05371			52.84	1.28662	1.10254	3.22168	4.04248	10.167
	63.14	0.606445	0.616699	1.46533	2.25488	5.10498			49.34	5.84766	6.10059	6.80469	7.48828	8.83789			-16.06	-0.03223	-0.14111	0.0142	-0.05371			52.94	1.29248	1.10645	3.22949	4.04834	10.1807
	63.24	0.62207	0.632324	1.48096	2.27051	5.11084			49.44	5.85254	6.10352	6.80957	7.48828	8.84277			-15.96	-0.02637	-0.133	-0.00635	-0.05762			53.04	1.28857	1.09863	3.22168	4.03857	10.1709
	63.34	0.62207	0.632324	1.48096	2.27051	5.10693			49.54	5.85937	6.11621	6.8164	7.48535	8.83789			-15.86	-0.02637	-0.13135	-0.01123	-0.06348			53.14	1.27881	1.08887	3.21191	4.03076	10.167
	63.44	0.62207	0.622559	1.47119	2.26465	5.09521			49.64	5.86035	6.11621	6.8125	7.48828	8.8418			-15.76	-0.0166	-0.127	-0.00146	-0.03809			53.24	1.27881	1.08887	3.21387	4.04053	10.167
	63.54	0.611328	0.609863	1.47119	2.25586	5.08643			49.74	5.87305	6.12793	6.81152	7.48828	8.83984			-15.66	-0.00684	-0.127	-0.00146	-0.04199			53.34	1.27686	1.08301	3.22168	4.04248	10.1865
	63.64	0.610352	0.618652	1.47119	2.24902	5.0835			49.84	5.88086	6.13184	6.81836	7.5	8.83203			-15.56	-0.02246	-0.129	-0.00342	-0.04004			53.44	1.28271	1.08789	3.22559	4.05811	10.1904
	63.74	0.615234	0.61377	1.4751	2.25293	5.09912			49.94	5.87305	6.12988	6.81445	7.50391	8.83008			-15.46	-0.02832	-0.12744	-0.0132	-0.03516			53.54	1.28857	1.09668	3.23242	4.06396	10.208
	63.84	0.62207	0.620605	1.48096	2.24902	5.09424			50.04	5.88086	6.12207	6.82422	7.50195	8.83398			-15.36	-0.02637	-0.11768	-0.0249	-0.04004			53.64	1.2915	1.09375	3.23828	4.06885	10.2275
	63.94	0.625977	0.620605	1.48096	2.25098	5.08936			50.14	5.88086	6.12402	6.82227	7.49414	8.81641			-15.26	-0.02637	-0.11768	-0.0317	-0.04004			53.74	1.31006	1.10645	3.24707	4.07568	10.2471
	64.04	0.616211	0.61084	1.46924	2.24316	5.08936			50.24	5.87305	6.12109	6.82031	7.48828	8.80859			-15.16	-0.02637	-0.12158	-0.04248	-0.04395			53.84	1.31396	1.12598	3.25879	4.07959	10.2568
	64.14	0.625977	0.622559	1.4751	2.24316	5.09131			50.34	5.87695	6.12793	6.82813	7.48438	8.80859			-15.06	-0.02637	-0.11377	-0.0386	-0.0498			53.94	1.31787	1.12012	3.2627	4.0835	10.2627
	64.24	0.631836	0.616699	1.48096	2.23926	5.08545			50.44	5.89453	6.13184	6.83594	7.49023	8.80078			-14.96	-0.0166	-0.11182	-0.04834	-0.0498			54.04	1.31396	1.11816	3.26074	4.08252	10.2607
	64.34	0.641602	0.622559	1.48096	2.25293	5.09131			50.54	5.90429	6.13769	6.83593	7.49805	8.80664			-14.86	-0.0166	-0.11182	-0.04834	-0.0498			54.14	1.33447	1.12207	3.27051	4.08935	10.2764
	64.44	0.641602	0.622559	1.47705	2.25488	5.10107			50.64	5.90234	6.13379	6.83203	7.51758	8.79883			-14.76	-0.02832	-0.10205	-0.0503	-0.04199			54.24	1.35107	1.12598	3.27637	4.09717	10.29
	64.54	0.62793	0.622559	1.47119	2.24023	5.0874			50.74	5.91797	6.16309	6.8418	7.50195	8.82617			-14.66	-0.02832	-0.09814	-0.05029	-0.03613			54.34	1.35303	1.14355	3.28223	4.09521	10.3037
	64.64	0.631836	0.622559	1.4751	2.25098	5.08545			50.84	5.92383	6.18457	6.86328	7.5293	8.83789			-14.56	-0.0166	-0.10791	-0.06006	-0.03027			54.44	1.37256	1.15332	3.29004	4.10303	10.3174
	64.74	0.635742	0.624512	1.48096	2.25488	5.09131			50.94	5.93555	6.19043	6.86133	7.5293	8.84961			-14.46	-0.0166	-0.09814	-0.04834	-0.03027			54.54	1.36865	1.15137	3.2959	4.10498	10.3271
	64.84	0.637695	0.640137	1.47705	2.27051	5.09131			51.04	5.92969	6.16699	6.85547	7.5332	8.82617			-14.36	-0.0166	-0.08643	-0.04834	-0.02051			54.64	1.36474	1.15527	3.30566	4.10107	10.335
	64.94	0.641602	0.640137	1.4751	2.27051	5.09131			51.14	5.94141	6.19043	6.86719	7.52734	8.8418			-14.26	-0.00684	-0.07666	-0.0386	-0.02051			54.74	1.36279	1.14941	3.29785	4.10889	10.333
	65.04	0.641602	0.640137	1.46729	2.27051	5.09131			51.24	5.9375	6.19238	6.86719	7.53906	8.84375			-14.16	-0.00684	-0.07666	-0.0249	-0.01074			54.84	1.35303	1.14844	3.2959	4.09912	10.3311
	65.14	0.651367	0.640137	1.4751	2.26855	5.09326			51.34	5.93555	6.18652	6.86719	7.53516	8.8457			-14.06	-0.00684	-0.07666	-0.02881	-0.02051			54.94	1.35693	1.14355	3.2959	4.11279	10.3467
	65.24	0.637695	0.630371	1.46533	2.25879	5.09521			51.44	5.9375	6.19824	6.87207	7.53418	8.8457			-13.96	-0.00879	-0.07861	-0.04053	-0.02637			55.04	1.35693	1.12988	3.28711	4.10498	10.3428
	65.34	0.637695	0.632324	1.46143	2.26074	5.09619			51.54	5.94141	6.21973	6.87109	7.54883	8.8418			-13.86	-0.00684	-0.07861	-0.04053	-0.0166			55.14	1.35498	1.13769	3.28808	4.10107	10.3506
	65.44	0.629883	0.633301	1.45264	2.25098	5.08936			51.64	5.95508	6.22168	6.86914	7.55273	8.85742			-13.76	-0.00684	-0.08252	-0.03857	-0.01465			55.24	1.34131	1.13379	3.28027	4.10693	10.3564
	65.54	0.637695	0.638184	1.46338	2.26074	5.0835			51.74	5.96484	6.22754	6.87305	7.55469	8.84961			-13.66	-0.00684	-0.08838	-0.03857	-0.02051			55.34	1.35303	1.13574	3.29785	4.10889	10.3623
	65.64	0.629883	0.630371	1.45361	2.24707	5.07959			51.84	5.98242	6.23145	6.87109	7.56055	8.87109			-13.56	-0.00684	-0.07666	-0.02881	-0.01074			55.44	1.35107	1.14746	3.30176	4.10889	10.3701
	65.74	0.637695	0.64209	1.45752	2.24902	5.08154			51.94	5.98047	6.22559	6.87305	7.57617	8.86523			-13.46	-0.0166	-0.07275	-0.03857	-0.02051			55.54	1.34521	1.14355	3.30762	4.10303	10.376
	65.84	0.62793	0.640137	1.45947	2.25684	5.07959			52.04	5.97363	6.22168	6.86719	7.58008	8.86914			-13.36	-0.0166	-0.06689	-0.03369	-0.02051			55.64	1.35693	1.16308	3.31738	4.12744	10.3955
	65.94	0.625977	0.63623	1.45752	2.25488	5.07764			52.14	5.98047	6.21582	6.85938	7.58398	8.86328			-13.26	-0.02637	-0.06689	-0.03174	-0.02637			55.74	1.35303	1.16504	3.3291	4.13037	10.3975
	66.04	0.631836	0.64209	1.45361	2.25098	5.0835			52.24	5.98438	6.22363	6.86914	7.57813	8.85547			-13.16	-0.0166	-0.04736	-0.02881	-0.00879			55.84	1.34521	1.16895	3.33105	4.13428	10.4219
	66.14	0.626953	0.641113	1.4624	2.26074	5.08252			52.34	5.97266	6.22559	6.84961	7.58203	8.84766			-13.06	-0.02246	-0.05127	-0.03271	-0.00488			55.94	1.34131	1.18652	3.33691	4.15381	10.4287
	66.24	0.634766	0.644043	1.46143	2.25879	5.0835			52.44	5.97363	6.21875	6.86035	7.55859	8.8584			-12.96	-0.02637	-0.04736	-0.03857	-0.02051			56.04	1.34229	1.18848	3.34668	4.15576	10.4385
	66.34	0.62793	0.640137	1.46143	2.24902	5.07568			52.54	5.97656	6.21777	6.84766	7.56738	8.85742			-12.86	-0.03613	-0.0376	-0.03369	-0.01074			56.14	1.33936	1.18848	3.33887	4.14404	10.4385
	66.44	0.62207	0.649902	1.47119	2.25293	5.0835			52.64	5.98633	6.22168	6.85156	7.57227	8.85742			-12.76	-0.03613	-0.04736	-0.03662	-0.02051			56.24	1.34717	1.19434	3.33691	4.14404	10.4482
	66.54	0.62207	0.640137	1.46338	2.24902	5.06982			52.74	5.98438	6.21973	6.84961	7.57617	8.85449			-12.66	-0.02637	-0.04736	-0.02686	-0.02051			56.34	1.34814	1.2041	3.3457	4.16455	10.4668
	66.64	0.631836	0.640137	1.46533	2.24902	5.07568			52.84	5.99414	6.22949	6.87109	7.58203	8.85938			-12.56	-0.02637	-0.03564	-0.02686	-0.01563			56.44	1.34521	1.21191	3.34473	4.16162	10.4756
	66.74	0.631836	0.654785	1.45947	2.25879	5.07373			52.94	5.99414	6.23438	6.86328	7.5957	8.87109			-12.46	-0.02637	-0.03564	-0.02686	-0.00684			56.54	1.3667	1.21777	3.34668	4.18115	10.4912
	66.84	0.62207	0.651855	1.46338	2.25293	5.06982			53.04	5.98633	6.24121	6.86523	7.60156	8.87109			-12.36	-0.01855	-0.02783	-0.02881	-0.00879			56.64	1.3667	1.21972	3.35644	4.1831	10.5029
	66.94	0.637695	0.66748	1.47119	2.26074	5.07568			53.14	5.99219	6.25879	6.87695	7.58984	8.88867			-12.26	-0.0166	-0.02783	-0.02686	0.000977			56.74	1.35498	1.20801	3.34473	4.17139	10.501
	67.04	0.629883	0.663574	1.46143	2.25098	5.06787			53.24	5.99219	6.2627	6.88086	7.60547	8.89258			-12.16	-0.01074	-0.02783	-0.02295	-0.00879			56.84	1.35693	1.22363	3.3457	4.18799	10.501
	67.14	0.637695	0.665527	1.46143	2.26074	5.06396			53.34	5.98828	6.26074	6.86719	7.61133	8.89844			-12.06	-0.0166	-0.01807	-0.01709	-0.00391			56.94	1.3667	1.2334	3.3584	4.20068	10.5166
	67.24	0.641602	0.675293	1.47607	2.27441	5.06982			53.44	5.99414	6.27246	6.86719	7.5957	8.89844			-11.96	-0.0166	-0.01807	-0.02686	-0.02051			57.04	1.3667	1.2334	3.36816	4.19873	10.5264
	67.34	0.631836	0.677246	1.46924	2.2666	5.06104			53.54	5.99414	6.27832	6.86719	7.60156	8.90234			-11.86	-0.02637	-0.02588	-0.02686	-0.03027			57.14	1.35498	1.22363	3.3623	4.18896	10.5264
	67.44	0.631836	0.675293	1.46338	2.2627	5.06201			53.64	6.00977	6.28223	6.875	7.58984	8.91211			-11.76	-0.02637	-0.02002	-0.03662	-0.03027			57.24	1.36084	1.22754	3.37598	4.19287	10.5361
	67.54	0.631836	0.690918	1.45752	2.26465	5.06787			53.74	6.00977	6.29199	6.88672	7.59863	8.90625			-11.66	-0.02051	-0.02783	-0.03857	-0.03223			57.34	1.36182	1.24316	3.38574	4.19482	10.5361
	67.64	0.631836	0.690918	1.46533	2.27246	5.06592			53.84	6.00195	6.29004	6.88379	7.61523	8.89844			-11.56	-0.03613	-0.02783	-0.03467	-0.04004			57.44	1.36279	1.24316	3.3916	4.20459	10.5361
	67.74	0.631836	0.694824	1.47119	2.27832	5.08154			53.94	6.00586	6.28223	6.89844	7.60156	8.90234			-11.46	-0.0459	-0.02783	-0.03076	-0.04004			57.54	1.36279	1.25293	3.39355	4.20459	10.5459
	67.84	0.645508	0.710449	1.48486	2.2832	5.08545			54.04	6	6.29199	6.89453	7.60156	8.89258			-11.36	-0.04199	-0.0376	-0.04248	-0.0498			57.64	1.35303	1.24316	3.3877	4.19287	10.5361
	67.94	0.641602	0.705566	1.48096	2.28027	5.09131			54.14	6.00391	6.29004	6.90039	7.60547	8.89453			-11.26	-0.03613	-0.03564	-0.03662	-0.04395			57.74	1.34326	1.24414	3.37598	4.19873	10.5371
	68.04	0.631836	0.69873	1.46729	2.27637	5.08154			54.24	6.00586	6.29199	6.90234	7.5918	8.89844			-11.16	-0.02637	-0.03564	-0.02686	-0.0498			57.84	1.33154	1.23535	3.36621	4.18896	10.5283
	68.14	0.643555	0.70459	1.46729	2.27637	5.0874			54.34	6.01172	6.28613	6.9082	7.58984	8.89844			-11.06	-0.02637	-0.02588	-0.02686	-0.04004			57.94	1.33545	1.2373	3.37988	4.19092	10.5381
	68.24	0.641602	0.708496	1.48291	2.29199	5.10303			54.44	6	6.28613	6.91992	7.59375	8.89453			-10.96	-0.0166	-0.01416	-0.02881	-0.04004			58.04	1.3335	1.23145	3.37402	4.18506	10.5244
	68.34	0.641602	0.724121	1.48682	2.2959	5.10693			54.54	6	6.28711	6.92188	7.59961	8.89453			-10.86	-0.02051	0.00146	-0.01709	-0.04004			58.14	1.34326	1.22949	3.37207	4.18896	10.5322
	68.44	0.641602	0.728027	1.50244	2.31152	5.12256			54.64	6.01172	6.2998	6.91992	7.58398	8.90625			-10.76	-0.02637	0.00342	-0.01709	-0.04004			58.24	1.34229	1.24414	3.38574	4.18799	10.5332
	68.54	0.636719	0.722168	1.49268	2.30566	5.11475			54.74	6.02441	6.28809	6.92578	7.59375	8.90625			-10.66	-0.02637	0.00342	-0.01709	-0.03027			58.34	1.34326	1.24316	3.39551	4.18701	10.5498
	68.64	0.643555	0.73584	1.50635	2.30957	5.12451			54.84	6.03516	6.2998	6.92578	7.58789	8.90625			-10.56	-0.0166	0.0132	-0.00732	-0.03027			58.44	1.33545	1.23145	3.37207	4.17529	10.542
	68.74	0.647461	0.741699	1.50244	2.31348	5.13037			54.94	6.04492	6.31348	6.93359	7.5918	8.91406			-10.46	-0.02637	0.00342	-0.01318	-0.03027			58.54	1.33545	1.2373	3.37207	4.18701	10.5518
	68.84	0.643555	0.73584	1.50244	2.30957	5.12549			55.04	6.05469	6.31348	6.95313	7.60547	8.92188			-10.36	-0.0166	0.0132	0.00244	-0.01855			58.64	1.34717	1.23926	3.38379	4.17822	10.5635
	68.94	0.643555	0.741699	1.50244	2.32324	5.13232			55.14	6.03711	6.2959	6.95117	7.61328	8.9082			-10.26	-0.03125	0.0083	0.00146	-0.02344			58.74	1.35596	1.24707	3.38965	4.19873	10.5693
	69.04	0.65332	0.751465	1.51221	2.33496	5.13232			55.24	6.04297	6.30371	6.96094	7.59961	8.91992			-10.16	-0.02832	-0.000488	-0.00146	-0.02246			58.84	1.35889	1.25293	3.39355	4.20068	10.583
	69.14	0.643555	0.741699	1.50049	2.31934	5.13623			55.34	6.06055	6.32715	6.9668	7.5918	8.92578			-10.06	-0.03809	-0.00635	-0.01318	-0.03223			58.94	1.35693	1.25293	3.38184	4.19873	10.5908
	69.24	0.643555	0.751465	1.50049	2.32324	5.14209			55.44	6.05664	6.31152	6.95117	7.60156	8.92969			-9.96	-0.02832	0.0112	0.000488	-0.02246			59.04	1.35889	1.24902	3.39355	4.19482	10.5928
	69.34	0.635742	0.745605	1.50439	2.3291	5.12646			55.54	6.05078	6.31738	6.95703	7.60449	8.93555			-9.86	-0.03809	0.00146	-0.00928	-0.03223			59.14	1.36279	1.23535	3.38574	4.20263	10.5908
	69.44	0.643555	0.757324	1.52197	2.33496	5.14404			55.64	6.05078	6.30957	6.94531	7.59961	8.92383			-9.76	-0.02832	0.00146	-0.01904	-0.03223			59.24	1.35498	1.23145	3.37988	4.20264	10.6064
	69.54	0.632813	0.758301	1.51123	2.33594	5.13135			55.74	6.04688	6.31934	6.94922	7.58789	8.93164			-9.66	-0.0166	0.00146	-0.00928	-0.03613			59.34	1.37256	1.23926	3.38379	4.20459	10.6025
	69.64	0.631836	0.745605	1.50049	2.32422	5.13037			55.84	6.05859	6.3291	6.95996	7.58789	8.93359			-9.56	-0.0127	0.00146	-0.01904	-0.03613			59.44	1.36279	1.22852	3.37207	4.19873	10.6006
	69.74	0.635742	0.751465	1.51514	2.33105	5.13428			55.94	6.05859	6.32715	6.9668	7.58789	8.9502			-9.46	-0.00879	0.00928	-0.01123	-0.02246			59.54	1.36279	1.23535	3.37598	4.2124	10.6064
	69.84	0.635742	0.756348	1.51221	2.33496	5.13037			56.04	6.05859	6.33496	6.95508	7.5918	8.94141			-9.36	-0.00879	0.021	-0.00928	-0.0166			59.64	1.36279	1.2334	3.37597	4.21435	10.6162
	69.94	0.62793	0.759277	1.50244	2.32715	5.1167			56.14	6.07031	6.34668	6.9668	7.59375	8.96289			-9.26	-0.00879	0.021	-0.00928	-0.02246			59.74	1.36475	1.2334	3.37598	4.22217	10.6162
	70.04	0.625977	0.755371	1.51221	2.32324	5.12451			56.24	6.0625	6.33984	6.95898	7.59961	8.95313			-9.16	-0.00293	0.01709	-0.01318	-0.02637			59.84	1.37256	1.22559	3.37793	4.22021	10.6074
	70.14	0.62207	0.755371	1.50635	2.3291	5.12451			56.34	6.08008	6.33887	6.96875	7.5918	8.95703			-9.06	-0.00879	0.021	-0.00928	-0.03223			59.94	1.38232	1.23926	3.3877	4.23975	10.6279
	70.24	0.625	0.76123	1.51221	2.34277	5.13037			56.44	6.08398	6.32715	6.94922	7.60156	8.94531			-8.96	-0.00684	0.021	-0.00928	-0.02051			60.04	1.37158	1.24023	3.37109	4.22705	10.6172
	70.34	0.631836	0.770996	1.52588	2.34863	5.14502			56.54	6.08594	6.32324	6.96289	7.57813	8.94141			-8.86	0.00293	0.021	-0.00537	-0.02051			60.14	1.38037	1.23535	3.36914	4.22607	10.626
	70.44	0.645508	0.774902	1.5415	2.3584	5.15186			56.64	6.08789	6.33301	6.96875	7.57813	8.95117			-8.76	0.00293	0.021	-0.00342	-0.02051			60.24	1.38037	1.23926	3.37402	4.229	10.6279
	70.54	0.641602	0.780762	1.52979	2.35254	5.146			56.74	6.09277	6.33887	6.97266	7.58984	8.96484			-8.66	0.012695	0.0229	-0.00732	-0.01074			60.34	1.38037	1.21777	3.35254	4.22021	10.6162
	70.64	0.631836	0.780762	1.53369	2.36816	5.15381			56.84	6.11133	6.33496	6.97852	7.58984	8.96875			-8.56	0.010742	0.021	0.00439	-0.0127			60.44	1.38525	1.22559	3.34668	4.21826	10.6201
	70.74	0.645508	0.784668	1.54932	2.36816	5.15967			56.94	6.10352	6.32715	6.97656	7.58984	8.9668			-8.46	0.010742	0.0308	0.000488	-0.0127			60.54	1.39209	1.22754	3.35645	4.2085	10.6318
	70.84	0.645508	0.790527	1.54346	2.3623	5.15967			57.04	6.09961	6.31934	6.96484	7.58594	8.95508			-8.36	0.010742	0.030762	0.010254	-0.01074			60.64	1.38623	1.22559	3.33691	4.19873	10.6201
	70.94	0.651367	0.794434	1.54932	2.37207	5.16357			57.14	6.09668	6.32227	6.96191	7.57617	8.95215			-8.26	0.012695	0.030762	0.010254	-0.000977			60.74	1.39014	1.23145	3.33496	4.20068	10.626
	71.04	0.649414	0.808105	1.55127	2.38574	5.18115			57.24	6.10742	6.3291	6.97266	7.56543	8.95898			-8.16	0.022461	0.030762	0.010254	0.00293			60.84	1.38232	1.23438	3.33691	4.2085	10.626
	71.14	0.635742	0.796387	1.5415	2.37012	5.17139			57.34	6.10156	6.32129	6.9668	7.58398	8.95898			-8.06	0.022461	0.030762	0.02002	0.018555			60.94	1.38232	1.23926	3.33691	4.2085	10.6396
	71.24	0.641602	0.800293	1.54541	2.38379	5.17529			57.44	6.11328	6.33887	6.97461	7.59375	8.96875			-7.96	0.022461	0.030762	0.021973	0.018555			61.04	1.39209	1.23926	3.32715	4.21826	10.6514
	71.34	0.645508	0.804199	1.55127	2.37988	5.17139			57.54	6.10547	6.33496	6.97266	7.60352	8.96094			-7.86	0.022461	0.042481	0.021973	0.018555			61.14	1.39209	1.2373	3.32715	4.22217	10.6494
	71.44	0.665039	0.810059	1.55615	2.37988	5.17139			57.64	6.11523	6.34668	6.97168	7.58887	8.9707			-7.76	0.024414	0.040527	0.029785	0.016602			61.24	1.39209	1.24121	3.32715	4.23584	10.6533
	71.54	0.657227	0.811035	1.54736	2.38086	5.17139			57.74	6.12109	6.34277	6.9707	7.60156	8.96875			-7.66	0.041992	0.040527	0.029785	0.018555			61.34	1.40186	1.23926	3.32715	4.24365	10.6572
	71.64	0.665039	0.812012	1.54541	2.37988	5.18506			57.84	6.10938	6.33691	6.95898	7.59375	8.95703			-7.56	0.022461	0.030762	0.029785	0.018555			61.44	1.39209	1.22949	3.31348	4.24365	10.6582
	71.74	0.661133	0.806152	1.55518	2.37402	5.18115			57.94	6.11719	6.33691	6.95117	7.57813	8.94922			-7.46	0.032227	0.040527	0.029785	0.018555			61.54	1.39209	1.2373	3.31152	4.2417	10.667
	71.84	0.665039	0.812012	1.56104	2.38965	5.19482			58.04	6.11523	6.34082	6.95117	7.58594	8.94922			-7.36	0.032227	0.040527	0.031738	0.02832			61.64	1.40967	1.25488	3.33301	4.26025	10.6748
	71.94	0.670898	0.825684	1.56494	2.38965	5.20068			58.14	6.12109	6.35059	6.96094	7.5957	8.9668			-7.26	0.032227	0.042481	0.031738	0.02832			61.74	1.396	1.24512	3.33105	4.25146	10.6631
	72.04	0.661133	0.825684	1.56104	2.38965	5.18896			58.24	6.11328	6.34863	6.95898	7.59375	8.96289			-7.16	0.032227	0.038574	0.041504	0.02832			61.84	1.41162	1.25684	3.34668	4.271	10.6885
	72.14	0.671875	0.827637	1.56104	2.38965	5.18994			58.34	6.10547	6.34473	6.94727	7.5918	8.94531			-7.06	0.045898	0.056152	0.049316	0.053711			61.94	1.4126	1.27246	3.34668	4.26904	10.6982
	72.24	0.672852	0.821777	1.5708	2.38965	5.20068			58.44	6.0918	6.34082	6.93945	7.58008	8.9375			-6.96	0.049805	0.063965	0.059082	0.057617			62.04	1.41357	1.27734	3.35156	4.27881	10.708
	72.34	0.666992	0.815918	1.56104	2.38379	5.19482			58.54	6.0918	6.34668	6.93164	7.58398	8.9375			-6.86	0.051758	0.07959	0.068848	0.057617			62.14	1.42334	1.28613	3.3584	4.29443	10.7217
	72.44	0.676758	0.821777	1.55518	2.39355	5.19482			58.64	6.08398	6.33887	6.92969	7.58984	8.94141			-6.76	0.041992	0.069824	0.059082	0.051758			62.24	1.42725	1.28613	3.3584	4.29053	10.7178
	72.54	0.682617	0.821777	1.56299	2.40137	5.20264			58.74	6.07617	6.33105	6.92578	7.58594	8.93945			-6.66	0.041992	0.067871	0.070801	0.053711			62.34	1.43701	1.29004	3.3623	4.29443	10.7217
	72.64	0.672852	0.812012	1.56299	2.3916	5.20264			58.84	6.08203	6.34863	6.94531	7.58789	8.94531			-6.56	0.041992	0.062012	0.070801	0.057617			62.44	1.43799	1.28906	3.37695	4.30322	10.7227
	72.74	0.672852	0.812012	1.5415	2.3916	5.19287			58.94	6.07422	6.34668	6.94141	7.60742	8.9375			-6.46	0.041992	0.062012	0.061035	0.05957			62.54	1.42529	1.27637	3.36621	4.30029	10.708
	72.84	0.682617	0.812012	1.55127	2.38965	5.19287			59.04	6.08398	6.3623	6.95508	7.60352	8.94141			-6.36	0.032227	0.052246	0.061035	0.049805			62.64	1.42724	1.28027	3.37402	4.3081	10.7217
	72.94	0.672852	0.806152	1.54639	2.37988	5.18311			59.14	6.08203	6.35742	6.95508	7.61328	8.93555			-6.26	0.030273	0.060059	0.059082	0.047852			62.74	1.43506	1.29785	3.38965	4.32764	10.7393
	73.04	0.663086	0.812012	1.54346	2.38379	5.17529			59.24	6.10742	6.37207	6.96289	7.60742	8.94336			-6.16	0.035156	0.061035	0.060059	0.052734			62.84	1.44092	1.29199	3.3916	4.31787	10.7412
	73.14	0.666992	0.816895	1.54346	2.40332	5.19482			59.34	6.10938	6.38184	6.97266	7.61523	8.94531			-6.06	0.041992	0.075684	0.061035	0.069336			62.94	1.43115	1.29199	3.37988	4.30615	10.7393
	73.24	0.65918	0.810059	1.54346	2.39551	5.18701			59.44	6.125	6.3877	6.97852	7.625	8.94531			-5.96	0.057617	0.083496	0.061035	0.073242			63.04	1.43115	1.29395	3.39355	4.30811	10.7432
	73.34	0.658203	0.812988	1.53857	2.39453	5.17627			59.54	6.13086	6.39941	6.98242	7.63086	8.94531			-5.86	0.053711	0.073731	0.053223	0.06543			63.14	1.43506	1.29394	3.40137	4.31201	10.7402
	73.44	0.645508	0.802246	1.52588	2.38281	5.16357			59.64	6.12793	6.3916	6.97656	7.63477	8.94141			-5.76	0.039063	0.068848	0.052246	0.066406			63.24	1.44678	1.29199	3.40137	4.32373	10.7432
	73.54	0.651367	0.796387	1.52588	2.37988	5.16943			59.74	6.14453	6.41895	6.98633	7.64063	8.95703			-5.66	0.042969	0.07666	0.052246	0.064453			63.34	1.43115	1.28223	3.39941	4.30811	10.7373
	73.64	0.655273	0.815918	1.5415	2.39355	5.17432			59.84	6.12891	6.41113	6.99023	7.65039	8.95801			-5.56	0.045898	0.081543	0.061035	0.079102			63.44	1.43604	1.28613	3.40527	4.31104	10.7373
	73.74	0.657227	0.796387	1.52588	2.38965	5.17725			59.94	6.12891	6.41699	6.99609	7.63867	8.96484			-5.46	0.02832	0.081543	0.05127	0.069336			63.54	1.44873	1.29004	3.41309	4.31982	10.749
	73.84	0.649414	0.794434	1.53369	2.38965	5.17529			60.04	6.13281	6.4209	7.0127	7.64355	8.98047			-5.36	0.041992	0.081543	0.061035	0.083008			63.64	1.44287	1.28808	3.4209	4.33349	10.7471
	73.94	0.640625	0.796387	1.52588	2.38965	5.17725			60.14	6.13086	6.43066	7.01758	7.6543	8.98242			-5.26	0.03418	0.069824	0.062988	0.088867			63.74	1.44287	1.29785	3.43262	4.34912	10.7432
	74.04	0.647461	0.790527	1.52002	2.38574	5.17139			60.24	6.13477	6.44824	7.01758	7.64844	8.99609			-5.16	0.038086	0.073731	0.062988	0.09082			63.84	1.45264	1.29199	3.4248	4.35303	10.751
	74.14	0.635742	0.790527	1.51416	2.37207	5.16162			60.34	6.13379	6.44141	7.01074	7.66406	8.99316			-5.06	0.03418	0.073731	0.072754	0.09082			63.94	1.45459	1.30469	3.44727	4.35889	10.7549
	74.24	0.637695	0.790527	1.52588	2.38379	5.17139			60.44	6.13672	6.44434	7.01367	7.6748	8.99805			-4.96	0.022461	0.071777	0.061035	0.088867			64.04	1.45264	1.30957	3.45215	4.35889	10.7588
	74.34	0.62207	0.780762	1.50635	2.36816	5.15967			60.54	6.14258	6.44629	7.01563	7.67383	8.99805			-4.86	0.022461	0.071777	0.057129	0.09375			64.14	1.44678	1.30566	3.45801	4.35303	10.751
	74.44	0.633789	0.79248	1.50635	2.37012	5.16162			60.64	6.15039	6.43848	7.01367	7.67383	8.99805			-4.76	0.032227	0.071777	0.059082	0.104492			64.24	1.44775	1.3125	3.45703	4.36377	10.7617
	74.54	0.62793	0.786621	1.51611	2.37402	5.15186			60.74	6.15039	6.4502	7.02734	7.69141	9.00195			-4.66	0.012695	0.073731	0.05127	0.100586			64.34	1.44678	1.31738	3.47754	4.36279	10.7607
	74.64	0.639648	0.808105	1.52783	2.38965	5.16162			60.84	6.15039	6.46777	7.03125	7.70313	9.01563			-4.56	0.00293	0.073731	0.05127	0.100586			64.44	1.4624	1.31934	3.47754	4.36279	10.7725
	74.74	0.624023	0.780762	1.51709	2.37988	5.15576			60.94	6.14648	6.45215	7.0293	7.71289	9.01172			-4.46	-0.01074	0.063965	0.035645	0.092773			64.54	1.45069	1.30762	3.46582	4.36182	10.7666
	74.84	0.633789	0.791504	1.52979	2.37598	5.15771			61.04	6.15234	6.45801	7.0293	7.71094	9.01758			-4.36	-0.00879	0.072754	0.047363	0.106445			64.64	1.45459	1.32715	3.47949	4.38232	10.7705
	74.94	0.62207	0.796387	1.51221	2.36523	5.146			61.14	6.15625	6.4668	7.03711	7.71094	9.02148			-4.26	-0.00293	0.073731	0.055176	0.104492			64.74	1.45654	1.33105	3.48145	4.37451	10.7705
	75.04	0.625977	0.806152	1.51611	2.38574	5.15186			61.24	6.16602	6.47949	7.04102	7.72656	9.02344			-4.16	0.00293	0.081543	0.061035	0.104492			64.84	1.44482	1.3252	3.46973	4.36084	10.7646
	75.14	0.62793	0.808105	1.52783	2.3877	5.14795			61.34	6.16016	6.47949	7.03711	7.73438	9.01758			-4.06	0.00293	0.091309	0.070801	0.129883			64.94	1.45654	1.3291	3.4834	4.36865	10.7666
	75.24	0.62207	0.79248	1.51611	2.38574	5.14697			61.44	6.17969	6.4873	7.04492	7.72852	9.02148			-3.96	0.010742	0.095215	0.074707	0.124023			65.04	1.45069	1.33399	3.47559	4.37842	10.7725
	75.34	0.616211	0.79248	1.52588	2.38184	5.146			61.54	6.18359	6.4873	7.05664	7.74805	9.01953			-3.86	0.024414	0.093262	0.07666	0.112305			65.14	1.46045	1.32715	3.47559	4.37842	10.7764
	75.44	0.631836	0.796387	1.53174	2.38379	5.15186			61.64	6.17969	6.50293	7.06055	7.75195	9.02539			-3.76	0.016602	0.085449	0.07666	0.116211			65.24	1.46143	1.33887	3.48535	4.37842	10.7764
	75.54	0.635742	0.802246	1.53174	2.38965	5.15576			61.74	6.19531	6.49707	7.06641	7.75977	9.02539			-3.66	-0.00879	0.069824	0.066895	0.114258			65.34	1.44092	1.31543	3.47363	4.37451	10.7725
	75.64	0.641602	0.806152	1.53564	2.39355	5.15186			61.84	6.20117	6.49707	7.06641	7.76465	9.03711			-3.56	-0.04785	0.062012	0.061035	0.129883			65.44	1.44287	1.31934	3.48242	4.37256	10.7666
	75.74	0.646484	0.811035	1.54053	2.39453	5.15088			61.94	6.20508	6.50098	7.07422	7.77148	9.03711			-3.46	-0.05176	0.083496	0.068848	0.147461			65.54	1.44678	1.32324	3.48731	4.38233	10.7705
	75.84	0.634766	0.805176	1.53467	2.39648	5.15479			62.04	6.21093	6.51074	7.08007	7.77148	9.05664			-3.36	-0.04199	0.071777	0.061035	0.125977			65.64	1.4585	1.33301	3.49707	4.38428	10.7822
	75.94	0.65332	0.822754	1.55225	2.40625	5.1626			62.14	6.19922	6.5166	7.08594	7.79102	9.0498			-3.26	-0.06152	0.052246	0.04541	0.105469			65.74	1.44287	1.32324	3.49121	4.37354	10.7666
	76.04	0.65332	0.825684	1.55127	2.41309	5.16162			62.24	6.20313	6.5166	7.08984	7.7793	9.04883			-3.16	-0.04395	0.054199	0.053223	0.106445			65.84	1.43408	1.32422	3.48438	4.36572	10.7568
	76.14	0.65332	0.831543	1.5415	2.41895	5.15576			62.34	6.21289	6.52441	7.09961	7.77539	9.06055			-3.06	-0.04785	0.04834	0.023926	0.073242			65.94	1.43115	1.31738	3.48145	4.37256	10.7666
	76.24	0.643555	0.820801	1.5415	2.40918	5.16162			62.44	6.23047	6.53613	7.10547	7.78516	9.07031			-2.96	-0.05664	0.0581	-0.00146	0.063477			66.04	1.43115	1.3252	3.47949	4.36865	10.7568
	76.34	0.649414	0.817871	1.53564	2.41016	5.15967			62.54	6.22656	6.53223	7.09766	7.79102	9.05664			-2.86	-0.0791	0.0747	0.00244	0.049805			66.14	1.42725	1.32715	3.49512	4.36865	10.7529
	76.44	0.637695	0.806152	1.5249	2.41113	5.1499			62.64	6.22852	6.52637	7.09082	7.7832	9.06055			-2.76	-0.11621	0.129395	0.028809	0.018555			66.24	1.41553	1.31641	3.49512	4.36865	10.751
	76.54	0.637695	0.808105	1.52783	2.40723	5.146			62.74	6.22559	6.51855	7.08984	7.78125	9.06641			-2.66	-0.14014	0.279297	0.093262	0.02832			66.34	1.43115	1.3291	3.49512	4.3667	10.7627
	76.64	0.62207	0.806152	1.52588	2.39551	5.13428			62.84	6.23242	6.53027	7.09766	7.7793	9.06641			-2.56	-0.1665	0.237793	0.104004	0.015625			66.44	1.43115	1.3291	3.50098	4.36865	10.7666
	76.74	0.635742	0.812012	1.5415	2.41113	5.1499			62.94	6.22461	6.54004	7.10547	7.79492	9.07031			-2.46	-0.11133	-0.04932	0.025391	-0.03809			66.54	1.43116	1.32325	3.50293	4.36475	10.7568
	76.84	0.631836	0.802246	1.53564	2.41504	5.14502			63.04	6.22656	6.53809	7.11719	7.80469	9.07227			-2.36	-0.06152	-0.14209	-0.09619	-0.09473			66.64	1.44482	1.34277	3.50488	4.37256	10.7764
	76.94	0.631836	0.802246	1.54736	2.41895	5.15186			63.14	6.22852	6.53809	7.12109	7.80273	9.06641			-2.26	-0.07617	-0.11865	-0.12451	-0.11328			66.74	1.44678	1.33887	3.50488	4.37256	10.7822
	77.04	0.62207	0.802246	1.5415	2.41895	5.15186			63.24	6.2207	6.54102	7.11914	7.80859	9.07031			-2.16	-0.04199	-0.05713	-0.03564	-0.02637			66.84	1.45654	1.34863	3.50684	4.37256	10.7881
	77.14	0.62793	0.808105	1.5415	2.41895	5.15186			63.34	6.22461	6.54785	7.12305	7.80469	9.07617			-2.06	-0.05176	-0.0396	0.0083	-0.06934			66.94	1.45654	1.35059	3.50781	4.38428	10.7979
	77.24	0.625977	0.806152	1.5415	2.41895	5.15186			63.44	6.22266	6.54004	7.12109	7.81055	9.07227			-1.96	0.12793	0.130371	0.171387	0.116211			67.04	1.4458	1.33692	3.50098	4.36865	10.7861
	77.34	0.631836	0.800293	1.53564	2.41309	5.14404			63.54	6.23438	6.54004	7.11719	7.81543	9.07813			-1.86	-0.01074	-0.01318	0.160645	0.081055			67.14	1.45264	1.33887	3.5127	4.37842	10.7959
	77.44	0.629883	0.808105	1.53955	2.43066	5.16162			63.64	6.23242	6.54395	7.10938	7.82227	9.07031			-1.76	0.12207	0.269043	0.247559	0.116211			67.24	1.46436	1.34863	3.50293	4.37256	10.7979
	77.54	0.62793	0.796387	1.52588	2.4209	5.15186			63.74	6.25	6.55566	7.13086	7.81445	9.08789			-1.66	-0.21973	0.859863	0.719238	0.102539			67.34	1.46436	1.34473	3.51465	4.38428	10.8037
	77.64	0.633789	0.802246	1.5415	2.43066	5.15576			63.84	6.25391	6.57129	7.14063	7.82813	9.09766			-1.56	0.073242	0.243652	0.151855	0.03418			67.44	1.4624	1.35449	3.5127	4.38818	10.8115
	77.74	0.633789	0.802246	1.53174	2.4209	5.15771			63.94	6.25977	6.56543	7.13477	7.82422	9.0957			-1.46	0.040039	0.433105	0.171387	0.203125			67.54	1.45264	1.34278	3.50293	4.38819	10.8135
	77.84	0.62207	0.79248	1.52197	2.4248	5.146			64.04	6.26367	6.56543	7.12695	7.83008	9.0957			-1.36	0.066406	0.38623	0.121582	0.162109			67.64	1.45264	1.34277	3.49121	4.39795	10.8174
	77.94	0.635742	0.806152	1.52588	2.43066	5.15576			64.14	6.25	6.56934	7.13086	7.83398	9.09277			-1.26	-0.01074	0.25	0.00146	0.116211			67.74	1.46338	1.34375	3.49414	4.39502	10.8262
	78.04	0.641602	0.816895	1.5415	2.43066	5.16162			64.24	6.25	6.56934	7.125	7.83203	9.0957			-1.16	-0.02637	0.09668	-0.09766	0.034668			67.84	1.44678	1.33887	3.47559	4.38916	10.8213
	78.14	0.631836	0.813965	1.52197	2.43066	5.15674			64.34	6.26171	6.57519	7.1289	7.82031	9.09961			-1.06	-0.05322	-0.0708	-0.09668	-0.02588			67.94	1.44092	1.33398	3.46582	4.39404	10.8213
	78.24	0.641602	0.812988	1.53174	2.42871	5.15869			64.44	6.26367	6.56738	7.12695	7.83203	9.08594			-0.96	0.021973	-0.08594	-0.01563	-0.00928			68.04	1.44092	1.33301	3.47559	4.39209	10.8193
	78.34	0.641602	0.812012	1.53174	2.42871	5.15576			64.54	6.27343	6.583	7.13086	7.81836	9.09375			-0.86	-0.05664	-0.16992	-0.08154	-0.13574			68.14	1.44092	1.33301	3.47559	4.39795	10.8311
	78.44	0.645508	0.804199	1.52197	2.43262	5.1499			64.64	6.27148	6.58691	7.13379	7.82617	9.10938			-0.76	-0.24512	-0.09082	-0.13867	-0.24121			68.24	1.44287	1.33496	3.4873	4.40381	10.8369
	78.54	0.641602	0.810059	1.51416	2.42871	5.14404			64.74	6.27246	6.5791	7.13672	7.83008	9.08984			-0.66	-0.07813	-0.24902	-0.23682	-0.20215			68.34	1.43115	1.3252	3.47656	4.39404	10.8281
	78.64	0.645508	0.819824	1.52002	2.42871	5.15381			64.84	6.27148	6.58887	7.11719	7.83008	9.08789			-0.56	-0.12793	-0.66211	-0.44287	-0.41113			68.44	1.43701	1.3291	3.4834	4.40381	10.8428
	78.74	0.651367	0.810059	1.51025	2.42285	5.1499			64.94	6.27148	6.58887	7.11719	7.82227	9.09961			0.139999	-0.51904	-0.604	-0.25244	1.28223			68.54	1.44092	1.33692	3.48145	4.41162	10.8506
	78.84	0.651367	0.813965	1.51416	2.42871	5.15381			65.04	6.25977	6.58301	7.10938	7.82813	9.09375			0.240002	-0.60303	-0.92139	-0.17236	1.375			68.64	1.43799	1.33887	3.47949	4.41357	10.8486
	78.94	0.645508	0.810059	1.51025	2.43262	5.15381			65.14	6.26855	6.60352	7.12402	7.81641	9.10645			0.34	-0.5835	-0.9707	-0.18701	1.36768			68.74	1.45459	1.35059	3.48536	4.4253	10.8545
	79.04	0.663086	0.825684	1.51611	2.44043	5.17139			65.24	6.27539	6.60254	7.11914	7.83691	9.10742			0.439999	-0.85938	-0.95898	-0.09521	1.11426			68.84	1.46631	1.3584	3.49121	4.43311	10.8623
	79.14	0.655273	0.821777	1.51611	2.43457	5.16162			65.34	6.28125	6.60839	7.11914	7.83594	9.11523			0.640003	-0.57373	-0.72315	0.229004	1.31348			68.94	1.46826	1.36816	3.50293	4.43311	10.874
	79.24	0.666992	0.821777	1.51807	2.44629	5.16162			65.44	6.27344	6.59668	7.12305	7.83789	9.12305			0.740002	-0.58008	-0.65576	0.289063	1.2627			69.04	1.46631	1.35645	3.49121	4.42725	10.8604
	79.34	0.645508	0.812012	1.51611	2.43066	5.1499			65.54	6.27734	6.6123	7.1289	7.82617	9.1289			0.84	-0.45801	-0.51807	0.500488	1.26172			69.14	1.45947	1.37305	3.50391	4.42822	10.873
	79.44	0.651367	0.815918	1.52588	2.44434	5.15479			65.64	6.28711	6.62207	7.13281	7.83984	9.14453			0.939999	-0.4043	-0.62109	0.471191	1.38379			69.24	1.46436	1.37207	3.51074	4.43701	10.8799
	79.54	0.651367	0.812012	1.52002	2.43848	5.16162			65.74	6.30468	6.63574	7.13867	7.84766	9.15625			1.04	-0.42676	-0.52344	0.319824	1.32227			69.34	1.45654	1.3584	3.50488	4.43799	10.8721
	79.64	0.651367	0.825684	1.52393	2.45215	5.16553			65.84	6.30664	6.62793	7.13477	7.85938	9.14844			1.44	-0.32813	-0.4751	0.680176	1.39063			69.44	1.45068	1.36719	3.51465	4.43896	10.876
	79.74	0.665039	0.82959	1.53467	2.45801	5.17529			65.94	6.3125	6.63965	7.14063	7.85156	9.14844			2.04	-0.26074	-0.48486	0.621582	1.37012			69.54	1.45264	1.37012	3.52246	4.44483	10.876
	79.84	0.676758	0.830566	1.5376	2.45898	5.17725			66.04	6.3125	6.62109	7.14063	7.85938	9.14063			2.14	-0.28613	-0.54932	0.602051	1.35645			69.64	1.45654	1.36816	3.52051	4.44287	10.8857
	79.94	0.675781	0.835449	1.53174	2.45996	5.18506			66.14	6.31445	6.62793	7.14258	7.85254	9.13867			2.24	-0.27832	-0.56152	0.61377	1.36816			69.74	1.46045	1.37403	3.52637	4.4585	10.8994
	80.04	0.672852	0.841309	1.52588	2.46387	5.18115			66.24	6.33203	6.62793	7.15625	7.85156	9.14648			2.34	-0.23486	-0.52539	0.647461	1.35498			69.84	1.45654	1.37402	3.52441	4.46826	10.915
	80.14	0.672852	0.831543	1.53564	2.45996	5.17139			66.34	6.32812	6.63964	7.15625	7.85938	9.14257			2.44	-0.23438	-0.5083	0.62207	1.35938			69.94	1.45459	1.3623	3.52441	4.4624	10.915
	80.24	0.666992	0.825684	1.53174	2.4541	5.16553			66.44	6.33008	6.65918	7.16797	7.85938	9.15332			2.54	-0.27832	-0.5044	0.590332	1.34082			70.04	1.44873	1.36426	3.52735	4.46436	10.918
	80.34	0.672852	0.821777	1.53564	2.45996	5.15967			66.54	6.31836	6.64746	7.14453	7.87109	9.15625			2.64	-0.2666	-0.46729	0.60791	1.38574			70.14	1.44482	1.36426	3.54199	4.4624	10.9287
	80.44	0.672852	0.815918	1.5415	2.45996	5.16357			66.64	6.33789	6.65527	7.15234	7.85938	9.16016			2.74	-0.22949	-0.44385	0.653809	1.41895			70.24	1.45069	1.34668	3.53809	4.4585	10.9326
	80.54	0.670898	0.835449	1.55518	2.46387	5.18311			66.74	6.35449	6.66699	7.16796	7.875	9.1582			2.84	-0.24805	-0.47607	0.672363	1.43945			70.34	1.4458	1.35254	3.54199	4.44873	10.9268
	80.64	0.665039	0.82959	1.54932	2.46973	5.1792			66.84	6.36132	6.66699	7.16015	7.87305	9.1582			2.94	-0.23633	-0.47412	0.682129	1.43359			70.44	1.45264	1.35254	3.55762	4.4624	10.9307
	80.74	0.670898	0.819824	1.54932	2.46582	5.16943			66.94	6.36523	6.65918	7.1582	7.87891	9.1582			3.04	-0.20313	-0.42236	0.711426	1.4707			70.54	1.45264	1.36426	3.55762	4.46826	10.9443
	80.84	0.672852	0.821777	1.55127	2.46387	5.17529			67.04	6.35352	6.66699	7.15137	7.88281	9.14648			3.14	-0.20117	-0.40479	0.733887	1.49023			70.64	1.44287	1.34473	3.54785	4.4585	10.9287
	80.94	0.666992	0.825684	1.54541	2.45996	5.18115			67.14	6.36328	6.66309	7.15039	7.87109	9.14258			3.24	-0.20703	-0.41065	0.708496	1.47656			70.74	1.44678	1.34863	3.55176	4.4624	10.9326
	81.04	0.668945	0.827637	1.55713	2.46582	5.18701			67.24	6.35547	6.66113	7.14258	7.86328	9.14063			3.34	-0.2207	-0.40674	0.693848	1.4707			70.84	1.4292	1.34863	3.54395	4.45459	10.9326
	81.14	0.661133	0.815918	1.54932	2.46777	5.18018			67.34	6.37304	6.6748	7.16015	7.85547	9.14648			3.44	-0.19434	-0.40186	0.724121	1.4873			70.94	1.42725	1.34668	3.54004	4.44873	10.9307
	81.24	0.65918	0.808105	1.55713	2.46582	5.1792			67.44	6.38281	6.66699	7.1582	7.86719	9.15039			3.54	-0.19629	-0.39697	0.736816	1.50684			71.04	1.41748	1.33887	3.53223	4.43799	10.9268
	81.34	0.657227	0.815918	1.55615	2.45996	5.17725			67.54	6.375	6.65918	7.15039	7.85938	9.14844			3.64	-0.20703	-0.39209	0.737793	1.49805			71.14	1.41748	1.34961	3.54199	4.44092	10.9385
	81.44	0.655273	0.812012	1.56299	2.4541	5.18311			67.64	6.375	6.65527	7.1543	7.86328	9.15234			3.74	-0.20508	-0.39502	0.725098	1.49316			71.24	1.42237	1.3418	3.53711	4.43018	10.9277
	81.54	0.647461	0.803223	1.54932	2.45605	5.18311			67.74	6.38476	6.6748	7.16601	7.85547	9.16992			3.84	-0.20606	-0.39795	0.703613	1.50195			71.34	1.42529	1.34277	3.5498	4.4292	10.9346
	81.64	0.646484	0.813965	1.55713	2.4541	5.18311			67.84	6.37891	6.65527	7.14648	7.86719	9.14453			3.94	-0.22168	-0.42432	0.691895	1.50488			71.44	1.43115	1.33691	3.55566	4.42139	10.9385
	81.74	0.639648	0.802246	1.54932	2.44629	5.17139			67.94	6.37109	6.65137	7.14258	7.85938	9.14844			4.04	-0.24707	-0.4126	0.677246	1.49512			71.54	1.42334	1.33301	3.54883	4.41162	10.9443
	81.84	0.647461	0.812012	1.54736	2.44531	5.18506			68.04	6.36719	6.64941	7.14063	7.85938	9.14844			4.14	-0.24902	-0.42432	0.664551	1.48926			71.64	1.43506	1.33301	3.55176	4.42334	10.9443
	81.94	0.643555	0.806152	1.55322	2.45215	5.18115			68.14	6.37109	6.65137	7.15039	7.85547	9.14648			4.24	-0.22754	-0.40479	0.686035	1.50879			71.74	1.43604	1.34473	3.56153	4.42334	10.9463
	82.04	0.643555	0.812012	1.55518	2.46582	5.17529			68.24	6.38281	6.66504	7.14843	7.85938	9.1582			4.34	-0.22754	-0.39893	0.67041	1.49902			71.84	1.43701	1.33301	3.55762	4.42139	10.9365
	82.14	0.647461	0.815918	1.55518	2.45996	5.18115			68.34	6.38086	6.65723	7.15234	7.85938	9.14648			4.44	-0.20996	-0.37549	0.693848	1.5166			71.94	1.43701	1.34277	3.56738	4.42725	10.9453
	82.24	0.65332	0.821777	1.5708	2.46387	5.19482			68.44	6.39258	6.65723	7.1582	7.86328	9.1582			4.54	-0.19336	-0.36377	0.695801	1.52832			72.04	1.4253	1.33301	3.56739	4.41748	10.9404
	82.34	0.652344	0.820801	1.56982	2.46484	5.1958			68.54	6.38477	6.65332	7.15039	7.86914	9.1582			4.64	-0.17969	-0.36377	0.70459	1.54883			72.14	1.43115	1.33691	3.5752	4.42139	10.9561
	82.44	0.639648	0.810059	1.56885	2.44824	5.19287			68.64	6.39453	6.66504	7.15625	7.86523	9.16016			4.74	-0.19238	-0.3794	0.70166	1.54004			72.24	1.43115	1.3291	3.56543	4.41553	10.9463
	82.54	0.633789	0.813965	1.57275	2.45215	5.19385			68.74	6.39258	6.66211	7.15234	7.86914	9.16992			4.84	-0.18848	-0.35596	0.711426	1.54883			72.34	1.43311	1.32715	3.57715	4.41748	10.9619
	82.64	0.641602	0.817871	1.58643	2.45996	5.19873			68.84	6.40234	6.69043	7.16796	7.86914	9.17578			4.94	-0.17871	-0.34619	0.725098	1.55176			72.44	1.41748	1.3291	3.57715	4.40869	10.9521
	82.74	0.641602	0.802246	1.57471	2.4502	5.18311			68.94	6.40234	6.68652	7.15625	7.87891	9.16406			5.04	-0.17285	-0.33447	0.727051	1.55371			72.54	1.42529	1.32715	3.57715	4.41357	10.96
	82.84	0.645508	0.815918	1.59033	2.45996	5.18506			69.04	6.41699	6.6875	7.16504	7.87891	9.16113			5.14	-0.17871	-0.354	0.721191	1.54785			72.64	1.40771	1.31348	3.56738	4.40576	10.9424
	82.94	0.645508	0.812012	1.59033	2.4541	5.18115			69.14	6.42383	6.7002	7.17773	7.88086	9.16797			5.24	-0.18262	-0.34619	0.715332	1.55176			72.74	1.40576	1.32324	3.56934	4.39209	10.9404
	83.04	0.651367	0.813965	1.59033	2.45996	5.19482			69.24	6.42383	6.7002	7.16992	7.89746	9.16016			5.34	-0.17871	-0.34033	0.725098	1.55762			72.84	1.40186	1.31152	3.56543	4.40186	10.9561
	83.14	0.641602	0.815918	1.60107	2.45605	5.19678			69.34	6.42578	6.70214	7.18066	7.88281	9.16601			5.44	-0.17285	-0.34424	0.717285	1.55762			72.94	1.41553	1.31738	3.58105	4.40967	10.9619
	83.24	0.631836	0.805176	1.59229	2.4541	5.19482			69.44	6.43945	6.71973	7.17969	7.88574	9.18164			5.54	-0.17481	-0.34619	0.715332	1.56152			73.04	1.40772	1.30957	3.57324	4.40967	10.9619
	83.34	0.634766	0.825684	1.60596	2.46191	5.20068			69.54	6.41992	6.69629	7.16406	7.90039	9.16797			5.64	-0.17383	-0.34033	0.721191	1.57129			73.14	1.41553	1.30859	3.57031	4.41357	10.9561
	83.44	0.637695	0.827637	1.59814	2.4541	5.19678			69.64	6.43262	6.69238	7.16602	7.88086	9.17188			5.74	-0.16504	-0.33643	0.729004	1.58105			73.24	1.40771	1.30957	3.56348	4.40381	10.9561
	83.54	0.62207	0.812012	1.59229	2.44824	5.18506			69.74	6.4414	6.68652	7.15625	7.89258	9.17773			5.84	-0.15137	-0.31104	0.752441	1.59863			73.34	1.38525	1.29785	3.54785	4.39209	10.9561
	83.64	0.625977	0.815918	1.59229	2.44824	5.19482			69.84	6.4414	6.70214	7.15625	7.88867	9.18554			5.94	-0.15137	-0.32471	0.752441	1.59863			73.44	1.39795	1.30957	3.56348	4.40381	10.9629
	83.74	0.625977	0.812012	1.59619	2.44824	5.20068			69.94	6.4375	6.70801	7.15234	7.90039	9.18164			6.04	-0.14746	-0.31885	0.73877	1.58887			73.54	1.40772	1.31934	3.56934	4.40967	10.9795
	83.84	0.62793	0.821777	1.59814	2.44824	5.20068			70.04	6.43945	6.68457	7.1582	7.89258	9.17578			6.14	-0.15137	-0.31885	0.727051	1.58887			73.64	1.40967	1.33496	3.56934	4.42041	10.9795
	83.94	0.62207	0.812012	1.60596	2.44824	5.20068			70.14	6.43555	6.68457	7.1582	7.88867	9.17969			6.24	-0.15527	-0.31104	0.729004	1.58496			73.74	1.40772	1.34473	3.57715	4.41944	10.9873
	84.04	0.625977	0.825684	1.61182	2.44824	5.20459			70.24	6.45703	6.70019	7.16601	7.88867	9.19726			6.34	-0.16309	-0.31299	0.727051	1.58301			73.84	1.41553	1.34668	3.59082	4.42334	11.001
	84.14	0.629883	0.833496	1.61182	2.45117	5.20654			70.34	6.46679	6.70214	7.16601	7.90039	9.20507			6.44	-0.16113	-0.29736	0.73291	1.58887			73.94	1.41162	1.35254	3.59082	4.42334	11.0068
	84.24	0.614258	0.821777	1.61182	2.45215	5.20557			70.44	6.46094	6.71191	7.17773	7.9043	9.20508			6.54	-0.15723	-0.29736	0.736816	1.58887			74.04	1.40283	1.34375	3.59766	4.43018	10.998
	84.34	0.612305	0.831543	1.61768	2.45215	5.2085			70.54	6.46484	6.70215	7.17773	7.91406	9.20508			6.64	-0.16113	-0.29736	0.742676	1.58887			74.14	1.38818	1.33301	3.58301	4.41357	10.9932
	84.44	0.612305	0.821777	1.60596	2.44629	5.19287			70.64	6.47461	6.71582	7.18555	7.91211	9.20898			6.74	-0.16699	-0.29736	0.742676	1.58887			74.24	1.396	1.33301	3.5791	4.41162	10.9912
	84.54	0.616211	0.821777	1.62158	2.46191	5.20654			70.74	6.48046	6.72754	7.19726	7.91602	9.22656			6.84	-0.15723	-0.2876	0.742676	1.58887			74.34	1.39404	1.32617	3.58887	4.41162	10.9951
	84.64	0.612305	0.821777	1.61768	2.44629	5.18896			70.84	6.49218	6.72363	7.19726	7.92969	9.22265			6.94	-0.15332	-0.29346	0.746582	1.59277			74.44	1.40576	1.33887	3.59082	4.42334	11.0146
	84.74	0.62207	0.821777	1.61182	2.44434	5.19678			70.94	6.48828	6.72559	7.20508	7.92969	9.22461			7.04	-0.15137	-0.2915	0.742676	1.59863			74.54	1.40381	1.32715	3.58985	4.41162	11.0049
	84.84	0.625977	0.831543	1.62549	2.45996	5.20654			71.04	6.48047	6.70996	7.18945	7.9375	9.20508			7.14	-0.14746	-0.28369	0.752441	1.6084			74.64	1.41748	1.33105	3.60449	4.41357	11.0166
	84.94	0.631836	0.841309	1.63135	2.47363	5.2124			71.14	6.48438	6.71582	7.19531	7.91797	9.21777			7.24	-0.14746	-0.27783	0.752441	1.6084			74.74	1.41651	1.33106	3.61231	4.41162	11.0264
	85.04	0.636719	0.835449	1.63525	2.46973	5.21631			71.24	6.48632	6.71972	7.19629	7.92969	9.23242			7.34	-0.14258	-0.27197	0.742676	1.6084			74.84	1.41748	1.34863	3.6123	4.42334	11.0361
	85.14	0.624023	0.827637	1.62744	2.46973	5.21826			71.34	6.49218	6.74218	7.21679	7.9375	9.23828			7.44	-0.13965	-0.26807	0.756348	1.6084			74.94	1.42529	1.33301	3.60059	4.4126	11.0264
	85.24	0.62793	0.831543	1.63135	2.46973	5.2124			71.44	6.48633	6.7373	7.20898	7.94922	9.23438			7.54	-0.13574	-0.26416	0.766113	1.61719			75.04	1.41943	1.34473	3.61816	4.42725	11.0371
	85.34	0.62207	0.82666	1.61182	2.46387	5.21631			71.54	6.47852	6.7373	7.21875	7.94531	9.22656			7.64	-0.12988	-0.26221	0.771973	1.625			75.14	1.40967	1.33496	3.60449	4.42139	11.0381
	85.44	0.635742	0.847168	1.61572	2.46973	5.22607			71.64	6.4873	6.74219	7.22363	7.9375	9.24707			7.74	-0.12988	-0.26807	0.771973	1.61816			75.24	1.40771	1.33496	3.6084	4.41943	11.0479
	85.54	0.636719	0.85791	1.62646	2.47461	5.2251			71.74	6.5039	6.74121	7.23046	7.94629	9.25976			7.84	-0.11035	-0.2583	0.781738	1.63281			75.34	1.41357	1.32324	3.59863	4.41943	11.0479
	85.64	0.619141	0.855957	1.61768	2.4668	5.22705			71.84	6.5	6.7373	7.22266	7.96289	9.24805			7.94	-0.10938	-0.25342	0.770996	1.64453			75.44	1.42334	1.32324	3.59668	4.42334	11.0615
	85.74	0.617188	0.852051	1.6167	2.46484	5.21533			71.94	6.5	6.74121	7.23633	7.96289	9.25977			8.04	-0.10156	-0.25147	0.770996	1.64648			75.54	1.42529	1.33692	3.60645	4.43897	11.0772
	85.84	0.616211	0.851074	1.61572	2.45801	5.21436			72.04	6.5	6.73926	7.23242	7.96875	9.25781			8.14	-0.09863	-0.25244	0.77002	1.63965			75.64	1.41846	1.32031	3.58789	4.43018	11.0742
	85.94	0.631836	0.864746	1.62158	2.47266	5.22998			72.14	6.5	6.73926	7.22656	7.96875	9.24609			8.24	-0.09277	-0.2583	0.77002	1.63965			75.74	1.42529	1.32617	3.59668	4.44092	11.0713
	86.04	0.631836	0.856934	1.61182	2.46582	5.21631			72.24	6.50879	6.76074	7.23828	7.95703	9.2539			8.34	-0.09863	-0.24854	0.76416	1.63965			75.84	1.41748	1.31934	3.58496	4.43701	11.0713
	86.14	0.631836	0.85498	1.61182	2.47363	5.2251			72.34	6.51563	6.76074	7.23438	7.97754	9.25977			8.44	-0.08887	-0.2583	0.77002	1.63379			75.94	1.40967	1.31738	3.58496	4.44678	11.0791
	86.24	0.62207	0.86084	1.60205	2.45996	5.21826			72.44	6.51758	6.75879	7.25391	7.97656	9.26172			8.54	-0.0791	-0.23877	0.779785	1.64941			76.04	1.40967	1.31934	3.58106	4.44678	11.0947
	86.34	0.612305	0.851074	1.59229	2.46387	5.20264			72.54	6.53125	6.76269	7.25976	7.98242	9.28711			8.64	-0.0791	-0.24854	0.779785	1.64941			76.14	1.42529	1.31738	3.59082	4.44873	11.1064
	86.44	0.606445	0.851074	1.58643	2.46973	5.2124			72.64	6.52734	6.76855	7.25586	7.98242	9.2793			8.74	-0.06934	-0.23877	0.783691	1.64941			76.24	1.42139	1.32715	3.59668	4.45264	11.1104
	86.54	0.615234	0.864746	1.58447	2.47949	5.21631			72.74	6.53125	6.7705	7.26757	7.98633	9.28125			8.84	-0.06348	-0.24268	0.785645	1.64941			76.34	1.4165	1.32324	3.58496	4.45166	11.1201
	86.64	0.62207	0.870605	1.59033	2.4834	5.23193			72.84	6.53516	6.76855	7.25977	7.99023	9.2793			8.94	-0.06543	-0.24463	0.783691	1.65332			76.44	1.41748	1.32324	3.59473	4.4585	11.1221
	86.74	0.62207	0.856934	1.59033	2.47949	5.22021			72.94	6.53125	6.78027	7.26367	7.99414	9.28711			9.04	-0.05371	-0.2251	0.799316	1.66895			76.54	1.42529	1.33301	3.60449	4.46826	11.1357
	86.84	0.625977	0.864746	1.59424	2.49316	5.23389			73.04	6.53906	6.77246	7.26953	7.99805	9.2832			9.14	-0.06348	-0.22315	0.785645	1.66504			76.64	1.41943	1.3252	3.59277	4.46045	11.127
	86.94	0.641602	0.871582	1.59619	2.49902	5.23975			73.14	6.54297	6.78223	7.2832	7.99219	9.28711			9.24	-0.06934	-0.229	0.779785	1.66309			76.74	1.41748	1.32324	3.59668	4.47412	11.1377
	87.04	0.631836	0.876465	1.58447	2.48926	5.23975			73.24	6.54297	6.76465	7.27734	7.99023	9.29102			9.34	-0.05762	-0.21729	0.79541	1.6709			76.84	1.40967	1.31348	3.59766	4.46826	11.1338
	87.14	0.631836	0.868652	1.59033	2.49023	5.22998			73.34	6.54102	6.75684	7.27734	7.99414	9.27734			9.44	-0.06152	-0.21729	0.791504	1.6748			76.94	1.41162	1.31738	3.59863	4.47803	11.1318
	87.24	0.637695	0.866699	1.59229	2.49121	5.2417			73.44	6.54492	6.77246	7.28223	8	9.28516			9.54	-0.05371	-0.21143	0.805176	1.69043			77.04	1.41162	1.30957	3.58692	4.47412	11.1338
	87.34	0.629883	0.868652	1.57861	2.47754	5.22803			73.54	6.53906	6.75879	7.27344	8.00391	9.26563			9.64	-0.05566	-0.22119	0.807129	1.68066			77.14	1.41162	1.30566	3.59668	4.47217	11.1416
	87.44	0.633789	0.866699	1.57275	2.48145	5.23584			73.64	6.53906	6.7666	7.28711	8.00195	9.26563			9.74	-0.06738	-0.22315	0.791504	1.68066			77.24	1.42334	1.31446	3.59863	4.47998	11.1533
	87.54	0.62793	0.876465	1.56592	2.47559	5.23193			73.74	6.53515	6.7666	7.28711	8.00977	9.26171			9.84	-0.06738	-0.21729	0.791504	1.68066			77.34	1.42334	1.30566	3.60254	4.48779	11.1514
	87.64	0.633789	0.88623	1.58252	2.48535	5.23584			73.84	6.54492	6.77441	7.28711	8.00977	9.26855			9.94	-0.05371	-0.20752	0.791504	1.69043			77.44	1.42041	1.30273	3.61328	4.49658	11.1563
	87.74	0.643555	0.888184	1.57275	2.49707	5.24756			73.94	6.54297	6.7666	7.2793	8.02148	9.26758			10.04	-0.04199	-0.19775	0.805176	1.7002			77.54	1.42334	1.2959	3.59863	4.49561	11.1553
	87.84	0.641602	0.88623	1.57275	2.50488	5.2417			74.04	6.54296	6.78613	7.29492	8.01953	9.27539			10.14	-0.04785	-0.19775	0.799316	1.69238			77.64	1.41553	1.28809	3.59082	4.48193	11.1416
	87.94	0.630859	0.887207	1.56201	2.49609	5.23682			74.14	6.55273	6.79395	7.30664	8.02344	9.27539			10.24	-0.03809	-0.18799	0.809082	1.70801			77.74	1.43506	1.30371	3.59082	4.48291	11.1514
	88.04	0.620117	0.884277	1.55127	2.48926	5.2251			74.24	6.55078	6.78613	7.28711	8.02539	9.26758			10.34	-0.02832	-0.17432	0.809082	1.70801			77.84	1.43701	1.29395	3.58301	4.48584	11.1416
	88.14	0.629883	0.891113	1.55127	2.48926	5.23779			74.34	6.54395	6.78613	7.29492	8.01758	9.26758			10.44	-0.02832	-0.16846	0.809082	1.70801			77.94	1.43604	1.29395	3.5791	4.48193	11.1494
	88.24	0.629883	0.901855	1.55127	2.49316	5.23389			74.44	6.55078	6.79102	7.30273	8.0332	9.26367			10.54	-0.03418	-0.16846	0.809082	1.70801			78.04	1.44873	1.29199	3.59473	4.49756	11.1514
	88.34	0.634766	0.895996	1.54346	2.49902	5.22998			74.54	6.55469	6.79004	7.30078	8.03125	9.26953			10.64	-0.0127	-0.15869	0.82373	1.71191			78.14	1.44678	1.29785	3.59668	4.50342	11.1514
	88.44	0.651367	0.911621	1.55908	2.49902	5.23975			74.64	6.55273	6.78809	7.31055	8.02344	9.26758			10.74	-0.01855	-0.15869	0.830566	1.71777			78.24	1.44287	1.31348	3.60645	4.50928	11.167
	88.54	0.637695	0.901855	1.54932	2.49512	5.23975			74.74	6.54102	6.78418	7.31641	8.0332	9.25977			10.84	-0.00879	-0.14893	0.830566	1.71777			78.34	1.44287	1.30371	3.59766	4.50928	11.1563
	88.64	0.633789	0.913574	1.55127	2.49316	5.2417			74.84	6.54492	6.78027	7.32031	8.02734	9.26563			10.94	-0.0127	-0.1626	0.82666	1.71387			78.44	1.43311	1.29199	3.58691	4.50928	11.1572
	88.74	0.62793	0.905762	1.54541	2.50293	5.23584			74.94	6.57031	6.80176	7.33008	8.02441	9.26953			11.04	-0.0166	-0.15674	0.836426	1.70996			78.54	1.44678	1.30567	3.60059	4.51123	11.1611
	88.84	0.639648	0.91748	1.54736	2.50488	5.23779			75.04	6.57031	6.78809	7.32422	8.04297	9.25586			11.14	-0.0127	-0.14307	0.846191	1.71387			78.64	1.45068	1.29785	3.60645	4.51709	11.1729
	88.94	0.62793	0.901855	1.54541	2.49316	5.23193			75.14	6.5625	6.78809	7.32031	8.0293	9.25977			11.24	-0.00684	-0.14697	0.842285	1.71973			78.74	1.45264	1.29883	3.6084	4.51319	11.1631
	89.04	0.643555	0.915527	1.55127	2.49902	5.24561			75.24	6.55469	6.77637	7.32617	8.02539	9.26953			11.34	0.00293	-0.13721	0.852051	1.72461			78.84	1.44873	1.30176	3.61426	4.50342	11.1729
	89.14	0.631836	0.911621	1.53662	2.49902	5.2417			75.34	6.56055	6.77637	7.32324	8.01953	9.26758			11.44	0.00293	-0.12744	0.855957	1.73145			78.94	1.43701	1.29785	3.60254	4.50244	11.1709
	89.24	0.637695	0.921387	1.54932	2.5	5.2417			75.44	6.58496	6.79688	7.33105	8.02344	9.28027			11.54	0.00293	-0.13721	0.861816	1.73145			79.04	1.43701	1.29981	3.61231	4.51514	11.1729
	89.34	0.635742	0.921387	1.54541	2.51074	5.25146			75.54	6.58398	6.80566	7.3418	8.0459	9.27539			11.64	0.00684	-0.11768	0.875488	1.74121			79.14	1.44092	1.30762	3.61035	4.50928	11.1709
	89.44	0.641602	0.925293	1.54541	2.51074	5.2417			75.64	6.59375	6.81348	7.33984	8.04102	9.2793			11.74	0.012695	-0.11768	0.871582	1.74121			79.24	1.44678	1.31543	3.61817	4.51123	11.1787
	89.54	0.637695	0.927246	1.54736	2.50684	5.25146			75.74	6.59375	6.81152	7.33984	8.0332	9.2832			11.84	0.022461	-0.104	0.881348	1.74512			79.34	1.44873	1.31543	3.62793	4.51123	11.1748
	89.64	0.635742	0.915527	1.53564	2.49121	5.2417			75.84	6.58594	6.81152	7.33203	8.04297	9.28125			11.94	0.026367	-0.09424	0.875488	1.75488			79.44	1.44287	1.3252	3.62793	4.5249	11.1709
	89.74	0.641602	0.931152	1.53174	2.49121	5.25146			75.94	6.58789	6.80957	7.33398	8.03516	9.29102			12.04	0.032227	-0.08838	0.871582	1.76074			79.54	1.44678	1.32911	3.63184	4.51905	11.167
	89.84	0.647461	0.931152	1.5415	2.49707	5.24951			76.04	6.58594	6.80957	7.33984	8.04492	9.28906			12.14	0.032227	-0.07861	0.881348	1.77051			79.64	1.45459	1.33301	3.64551	4.53271	11.1807
	89.94	0.645508	0.940918	1.54541	2.50098	5.25928			76.14	6.5918	6.81934	7.3418	8.04297	9.30273			12.24	0.032227	-0.07861	0.871582	1.77051			79.74	1.4624	1.33887	3.6416	4.53076	11.1787
	90.04	0.651367	0.931152	1.53174	2.49316	5.25439			76.24	6.5918	6.81934	7.35938	8.04492	9.31641			12.34	0.041992	-0.06885	0.885254	1.77051			79.84	1.4624	1.34375	3.65723	4.53955	11.1973
	90.14	0.641602	0.924316	1.52393	2.48926	5.26123			76.34	6.56055	6.80762	7.34766	8.05078	9.28516			12.44	0.051758	-0.06885	0.891113	1.78027			79.94	1.45654	1.34277	3.6377	4.53271	11.1846
	90.24	0.643555	0.942871	1.5415	2.49121	5.27686			76.44	6.57227	6.81152	7.35156	8.03125	9.29688			12.54	0.071289	-0.05908	0.900879	1.78223			80.04	1.47217	1.34668	3.64746	4.54053	11.1895
	90.34	0.643555	0.937012	1.53564	2.49121	5.27295			76.54	6.57617	6.80957	7.36133	8.03906	9.29688			12.64	0.057617	-0.06299	0.900879	1.78418			80.14	1.46436	1.35547	3.63965	4.53662	11.1963
	90.44	0.643555	0.942871	1.5376	2.49121	5.28271			76.64	6.57422	6.80176	7.35352	8.03125	9.29395			12.74	0.051758	-0.06885	0.88916	1.77832			80.24	1.46631	1.34863	3.64551	4.52686	11.1865
	90.54	0.643555	0.942871	1.52588	2.49121	5.27295			76.74	6.58008	6.81152	7.35742	8.02344	9.31055			12.84	0.051758	-0.06885	0.88916	1.78223			80.34	1.46631	1.3584	3.6377	4.53857	11.1885
	90.64	0.643555	0.942871	1.5415	2.49121	5.27295			76.84	6.56836	6.81738	7.35742	8.02539	9.29492			12.94	0.061523	-0.05908	0.898926	1.79785			80.44	1.47217	1.36816	3.63184	4.53076	11.1904
	90.74	0.642578	0.928223	1.53174	2.49023	5.2583			76.94	6.57227	6.81738	7.36133	8.01953	9.29883			13.04	0.061523	-0.05908	0.88916	1.79199			80.54	1.46631	1.37403	3.62988	4.53662	11.1865
	90.84	0.641602	0.921387	1.52197	2.47949	5.25537			77.04	6.57031	6.81738	7.36719	8.02734	9.30859			13.14	0.049805	-0.05908	0.88916	1.79785			80.64	1.46631	1.37402	3.6416	4.5376	11.1924
	90.94	0.646484	0.915527	1.51611	2.47949	5.25146			77.14	6.56641	6.79785	7.34766	8.02344	9.29688			13.24	0.06543	-0.04736	0.891113	1.7998			80.74	1.46436	1.37598	3.63965	4.52881	11.1904
	91.04	0.651367	0.925293	1.53174	2.4834	5.25537			77.24	6.58008	6.81738	7.35547	8.00977	9.29297			13.34	0.071289	-0.04736	0.89502	1.7998			80.84	1.48389	1.39551	3.64551	4.53271	11.2061
	91.14	0.655273	0.921387	1.52197	2.48926	5.26123			77.34	6.58008	6.82129	7.35156	8.01465	9.29883			13.44	0.071289	-0.05713	0.900879	1.79395			80.94	1.48193	1.40332	3.6416	4.54053	11.1982
	91.24	0.651367	0.921387	1.52588	2.47949	5.25342			77.44	6.56836	6.81543	7.35742	8.02539	9.28711			13.54	0.081055	-0.0376	0.910645	1.80957			81.04	1.4917	1.41309	3.65723	4.53467	11.208
	91.34	0.661133	0.921387	1.52588	2.47559	5.26514			77.54	6.56055	6.81934	7.3623	8.01953	9.29102			13.64	0.081055	-0.03369	0.904785	1.7998			81.14	1.50146	1.40723	3.65918	4.54248	11.2061
	91.44	0.651367	0.913574	1.51025	2.46191	5.24951			77.64	6.55273	6.81152	7.36133	8.01172	9.30078			13.74	0.071289	-0.03174	0.910645	1.7998			81.24	1.48584	1.41309	3.66113	4.53857	11.2061
	91.54	0.665039	0.919434	1.51416	2.47754	5.25342			77.74	6.5625	6.81934	7.37109	8.00781	9.30273			13.84	0.081055	-0.02393	0.925293	1.80957			81.34	1.4751	1.40137	3.65039	4.52881	11.2061
	91.64	0.657227	0.905762	1.50635	2.46387	5.24951			77.84	6.56055	6.81738	7.37305	8.02344	9.29688			13.94	0.084961	-0.01807	0.922363	1.80371			81.44	1.49365	1.4043	3.66504	4.52881	11.2139
	91.74	0.665039	0.913574	1.50439	2.46777	5.24951			77.94	6.56543	6.83008	7.37891	8.01367	9.30859			14.04	0.100586	-0.0083	0.922363	1.81934			81.54	1.49365	1.41895	3.67285	4.52881	11.2119
	91.84	0.661133	0.909668	1.50049	2.45801	5.24951			78.04	6.56445	6.82129	7.37109	8.03125	9.30469			14.14	0.09082	-0.0083	0.922363	1.82324			81.64	1.48779	1.41504	3.67285	4.53271	11.2178
	91.94	0.661133	0.899902	1.50049	2.44824	5.24365			78.14	6.57813	6.81934	7.38086	8.01563	9.31641			14.24	0.09082	-0.0083	0.912598	1.8291			81.74	1.49951	1.41504	3.68653	4.53467	11.2158
	92.04	0.661133	0.909668	1.50439	2.46191	5.24951			78.24	6.58398	6.82715	7.39258	8.01367	9.32813			14.34	0.100586	-0.0083	0.92627	1.8291			81.84	1.49561	1.41309	3.69043	4.54248	11.2256
	92.14	0.655273	0.904785	1.50049	2.46777	5.23975			78.34	6.58398	6.82324	7.39063	8.03125	9.32422			14.44	0.100586	-0.0083	0.922363	1.8291			81.94	1.49756	1.41309	3.68262	4.53271	11.2119
	92.24	0.663086	0.919434	1.49658	2.47559	5.24756			78.44	6.58203	6.83887	7.39258	8.03125	9.33594			14.54	0.100586	0.00537	0.924316	1.83887			82.04	1.49756	1.41895	3.69238	4.54248	11.2119
	92.34	0.663086	0.907715	1.49463	2.46387	5.22998			78.54	6.57031	6.83496	7.39453	8.0332	9.32422			14.64	0.100586	0.011231	0.930176	1.83301			82.14	1.50732	1.41895	3.68848	4.54834	11.2178
	92.44	0.665039	0.913574	1.50439	2.46973	5.24463			78.64	6.57031	6.83105	7.38672	8.03125	9.32422			14.74	0.100586	0.011231	0.92041	1.83887			82.24	1.51319	1.43457	3.7002	4.55322	11.2158
	92.54	0.661133	0.91748	1.50049	2.45996	5.2417			78.74	6.57422	6.83691	7.39063	8.03711	9.33984			14.84	0.110352	0.020996	0.934082	1.84863			82.34	1.51611	1.43164	3.70117	4.55518	11.2256
	92.64	0.661133	0.921387	1.51514	2.47461	5.2417			78.84	6.56055	6.84082	7.39648	8.04102	9.33789			14.94	0.114258	0.024902	0.943848	1.84082			82.44	1.51514	1.43652	3.7002	4.56396	11.2373
	92.74	0.666016	0.921387	1.52197	2.48145	5.24561			78.94	6.56445	6.83496	7.39648	8.05078	9.33789			15.04	0.124023	0.036621	0.949707	1.85645			82.54	1.51123	1.42871	3.70215	4.56592	11.2373
	92.84	0.65918	0.907715	1.51221	2.46973	5.23779			79.04	6.5625	6.84668	7.39258	8.05176	9.33594			15.14	0.129883	0.040527	0.953613	1.85645			82.64	1.521	1.42285	3.70117	4.56592	11.2412
	92.94	0.663086	0.915527	1.51221	2.47949	5.24561			79.14	6.57031	6.85059	7.40625	8.05078	9.33594			15.24	0.129883	0.040527	0.959473	1.84668			82.74	1.51612	1.41602	3.70606	4.57764	11.2471
	93.04	0.666992	0.911621	1.51611	2.47949	5.23584			79.24	6.57422	6.84863	7.41016	8.05078	9.32813			15.34	0.129883	0.040527	0.959473	1.84668			82.84	1.52686	1.42285	3.71582	4.57764	11.2568
	93.14	0.663086	0.911621	1.51221	2.47363	5.2417			79.34	6.57031	6.84082	7.39844	8.04297	9.3252			15.44	0.141602	0.042481	0.965332	1.8584			82.94	1.5249	1.41699	3.70605	4.57178	11.2549
	93.24	0.672852	0.915527	1.51221	2.47949	5.2417			79.44	6.57422	6.84277	7.41016	8.03516	9.33008			15.54	0.141602	0.042481	0.971191	1.84863			83.04	1.51904	1.41504	3.70801	4.56396	11.2471
	93.34	0.672852	0.927246	1.52197	2.48926	5.2417			79.54	6.57227	6.84668	7.41992	8.03711	9.32813			15.64	0.151367	0.052246	0.971191	1.86328			83.14	1.50732	1.41895	3.69824	4.56201	11.2373
	93.44	0.663086	0.911621	1.51221	2.47949	5.2417			79.64	6.58008	6.8584	7.42578	8.05273	9.33984			15.74	0.151367	0.040527	0.975098	1.87012			83.24	1.51319	1.41895	3.70801	4.56787	11.2334
	93.54	0.666992	0.915527	1.50049	2.46973	5.22412			79.74	6.57617	6.85449	7.42969	8.05664	9.33203			15.84	0.155273	0.044434	0.975098	1.87402			83.34	1.52295	1.42676	3.71777	4.56787	11.2412
	93.64	0.663086	0.91748	1.50049	2.46973	5.23975			79.84	6.5918	6.86621	7.42773	8.05469	9.35156			15.94	0.161133	0.050293	0.984863	1.87012			83.44	1.51514	1.42285	3.70605	4.55811	11.2451
	93.74	0.645508	0.911621	1.49463	2.46973	5.22998			79.94	6.5918	6.8584	7.43164	8.07031	9.34961			16.04	0.161133	0.050293	0.990723	1.87402			83.54	1.52686	1.42285	3.71582	4.55713	11.2549
	93.84	0.663086	0.91748	1.51221	2.47559	5.24561			80.04	6.5957	6.87012	7.44238	8.06641	9.35742			16.14	0.166016	0.050293	0.990723	1.87988			83.64	1.52686	1.43457	3.72168	4.56982	11.2568
	93.94	0.657227	0.911621	1.50635	2.47168	5.2417			80.14	6.59766	6.87598	7.44043	8.08008	9.3457			16.24	0.167969	0.050293	0.980957	1.87988			83.74	1.53662	1.43652	3.73145	4.57373	11.2471
	94.04	0.65918	0.91748	1.52197	2.48145	5.24268			80.24	6.58984	6.88086	7.44238	8.06836	9.34961			16.34	0.170898	0.060059	0.995605	1.89355			83.84	1.53857	1.43359	3.72363	4.57568	11.2471
	94.14	0.657227	0.925293	1.52197	2.4834	5.24365			80.34	6.60156	6.87598	7.44531	8.06055	9.35547			16.44	0.175781	0.056152	0.992676	1.89941			83.94	1.53076	1.44434	3.72949	4.56982	11.2568
	94.24	0.65332	0.92627	1.51221	2.48926	5.23389			80.44	6.60742	6.87598	7.44531	8.04883	9.35547			16.54	0.182617	0.050293	0.992676	1.89941			84.04	1.53076	1.43457	3.73145	4.56983	11.2559
	94.34	0.670898	0.937012	1.521	2.49805	5.25146			80.54	6.60449	6.87207	7.44141	8.05664	9.35547			16.64	0.182617	0.050293	0.992676	1.89941			84.14	1.52783	1.43164	3.7373	4.57666	11.2539
	94.44	0.682617	0.952637	1.54346	2.51074	5.26318			80.64	6.61133	6.87793	7.44727	8.06055	9.36328			16.74	0.1875	0.055176	1.00146	1.89453			84.24	1.52491	1.42481	3.72754	4.56202	11.251
	94.54	0.682617	0.946777	1.53369	2.51465	5.25537			80.74	6.60352	6.87793	7.45117	8.05664	9.36523			16.84	0.194336	0.062012	1.00244	1.90137			84.34	1.54053	1.42676	3.72754	4.57178	11.2607
	94.64	0.682617	0.952637	1.54346	2.5166	5.271			80.84	6.61328	6.88184	7.45703	8.05859	9.36914			16.94	0.194336	0.071777	1.00635	1.90137			84.44	1.55127	1.43848	3.7373	4.5835	11.2725
	94.74	0.672852	0.942871	1.53174	2.51465	5.26123			80.94	6.62109	6.8877	7.46875	8.05859	9.38086			17.04	0.183594	0.061035	0.997559	1.88672			84.54	1.5542	1.43262	3.74512	4.58155	11.2803
	94.84	0.665039	0.942871	1.53174	2.51074	5.25537			81.04	6.625	6.8916	7.46875	8.05859	9.38672			17.14	0.192383	0.060059	0.990723	1.89355			84.64	1.56201	1.43848	3.76074	4.59912	11.2979
	94.94	0.676758	0.94873	1.5376	2.52051	5.25732			81.14	6.63086	6.89746	7.47266	8.07031	9.39844			17.24	0.192383	0.056152	0.994629	1.88965			84.74	1.55615	1.43262	3.7666	4.61279	11.2998
	95.04	0.666016	0.937012	1.52197	2.51465	5.24561			81.24	6.63477	6.88965	7.47852	8.06641	9.38672			17.34	0.197266	0.059082	1.00537	1.89453			84.84	1.56201	1.44238	3.7666	4.6167	11.3018
	95.14	0.676758	0.933105	1.51611	2.51074	5.25146			81.34	6.625	6.87988	7.45898	8.06836	9.39453			17.44	0.208984	0.062988	0.997559	1.89063			84.94	1.54834	1.43848	3.7627	4.61279	11.2822
	95.24	0.672852	0.937012	1.52197	2.50488	5.24561			81.44	6.63867	6.88574	7.48047	8.05664	9.41406			17.54	0.192383	0.050293	0.990723	1.88965			85.04	1.5542	1.43652	3.77051	4.61084	11.29
	95.34	0.663086	0.933105	1.52588	2.50098	5.2417			81.54	6.63477	6.87402	7.4668	8.07617	9.39453			17.64	0.196289	0.044434	0.980957	1.88965			85.14	1.55615	1.44238	3.7627	4.60303	11.292
	95.44	0.676758	0.935059	1.53174	2.50293	5.2417			81.64	6.64063	6.88184	7.4707	8.06836	9.40625			17.74	0.211914	0.060059	0.990723	1.88965			85.24	1.54248	1.44434	3.77051	4.59717	11.3018
	95.54	0.672852	0.940918	1.52197	2.50879	5.23389			81.74	6.63281	6.87988	7.46484	8.06445	9.39844			17.84	0.22168	0.060059	0.994629	1.88965			85.34	1.53271	1.44238	3.7627	4.59814	11.3057
	95.64	0.666992	0.931152	1.51611	2.5127	5.23975			81.84	6.63867	6.88574	7.45703	8.06641	9.39648			17.94	0.22168	0.060059	0.990723	1.89355			85.44	1.5249	1.44238	3.75684	4.60303	11.2959
	95.74	0.667969	0.930176	1.51709	2.50391	5.22021			81.94	6.64258	6.88965	7.46484	8.0752	9.39648			18.04	0.22168	0.060059	0.990723	1.8877			85.54	1.54053	1.43848	3.75684	4.60889	11.3018
	95.84	0.655273	0.919434	1.51025	2.49707	5.21045			82.04	6.65625	6.89941	7.46875	8.07813	9.39648			18.14	0.22168	0.060059	0.994629	1.8877			85.64	1.53076	1.43652	3.75684	4.60889	11.291
	95.94	0.661133	0.919434	1.50439	2.49121	5.20068			82.14	6.66309	6.89551	7.46484	8.07031	9.38477			18.24	0.211914	0.060059	0.990723	1.8877			85.74	1.54346	1.44043	3.76856	4.62061	11.3057
	96.04	0.655273	0.92334	1.51025	2.49707	5.19482			82.24	6.66211	6.8916	7.45703	8.0625	9.38477			18.34	0.21582	0.050293	1.00049	1.8916			85.84	1.54443	1.44434	3.77637	4.62451	11.3018
	96.14	0.65918	0.929199	1.52002	2.50195	5.21436			82.34	6.66602	6.89355	7.45703	8.07227	9.37305			18.44	0.231445	0.060059	1.00439	1.89746			85.94	1.54443	1.43359	3.7666	4.61475	11.3037
	96.24	0.645508	0.929199	1.50635	2.49512	5.21045			82.44	6.66797	6.89355	7.46484	8.06055	9.38965			18.54	0.217773	0.056152	1.00049	1.8877			86.04	1.53662	1.43457	3.7666	4.61279	11.292
	96.34	0.643555	0.919434	1.50049	2.49316	5.20068			82.54	6.67578	6.90234	7.45703	8.07227	9.39648			18.64	0.22168	0.063965	1.01025	1.8877			86.14	1.5376	1.43359	3.76172	4.60791	11.2969
	96.44	0.651367	0.936035	1.50439	2.50098	5.21631			82.64	6.66992	6.90527	7.45703	8.07031	9.37988			18.74	0.231445	0.065918	1.00439	1.8877			86.24	1.5249	1.42285	3.75977	4.60694	11.2959
	96.54	0.647461	0.929199	1.50635	2.49121	5.2124			82.74	6.68555	6.91309	7.47852	8.06641	9.40137			18.84	0.236328	0.055176	1.01514	1.88281			86.34	1.54248	1.4248	3.76465	4.61865	11.3076
	96.64	0.631836	0.927246	1.49463	2.48145	5.2124			82.84	6.69141	6.91504	7.4668	8.08203	9.39648			18.94	0.238281	0.066895	1.00732	1.88477			86.44	1.54248	1.4248	3.76074	4.62354	11.3115
	96.74	0.645508	0.942871	1.51025	2.49512	5.22217			82.94	6.69922	6.92676	7.47461	8.08203	9.4043			19.04	0.225586	0.054199	1.00439	1.87793			86.54	1.54639	1.43262	3.79004	4.62842	11.3272
	96.84	0.637695	0.938965	1.50635	2.48535	5.21045			83.04	6.69922	6.93457	7.47461	8.08398	9.41602			19.14	0.237305	0.069824	1.0083	1.8877			86.64	1.56006	1.44238	3.79199	4.63818	11.3252
	96.94	0.631836	0.92334	1.49463	2.4834	5.20459			83.14	6.69531	6.92676	7.4668	8.07813	9.41602			19.24	0.235352	0.069824	1.0083	1.87793			86.74	1.55029	1.43652	3.78613	4.62842	11.3252
	97.04	0.626953	0.91748	1.50049	2.48926	5.20068			83.24	6.68945	6.91895	7.46777	8.07422	9.4082			19.34	0.242188	0.074707	1.0083	1.88281			86.84	1.54053	1.43848	3.78613	4.62842	11.3252
	97.14	0.633789	0.92334	1.50049	2.4834	5.20459			83.34	6.69336	6.9248	7.47852	8.07617	9.41797			19.44	0.243164	0.077637	1.02197	1.87988			86.94	1.53662	1.43262	3.77246	4.62842	11.3115
	97.24	0.629883	0.921387	1.49658	2.48535	5.20654			83.44	6.69629	6.93359	7.47559	8.08008	9.42285			19.54	0.239258	0.071777	1.02197	1.87988			87.04	1.54346	1.43066	3.77441	4.64014	11.3174
	97.34	0.62793	0.911621	1.48096	2.47949	5.20557			83.54	6.69531	6.92871	7.47852	8.07715	9.41797			19.64	0.233398	0.075684	1.01221	1.87402			87.14	1.53271	1.41309	3.77246	4.63818	11.3174
	97.44	0.624023	0.925293	1.48584	2.47363	5.21631			83.64	6.70508	6.93262	7.4707	8.08008	9.42188			19.74	0.233398	0.071777	1.00244	1.87988			87.24	1.53662	1.41699	3.77637	4.63233	11.3057
	97.54	0.62207	0.931152	1.48877	2.47559	5.21826			83.74	6.71094	6.92676	7.4707	8.08398	9.42773			19.84	0.223633	0.071777	1.00244	1.87012			87.34	1.54248	1.42285	3.77246	4.64404	11.3164
	97.64	0.616211	0.911621	1.47314	2.4541	5.19678			83.84	6.7041	6.92285	7.46875	8.08984	9.41602			19.94	0.223633	0.071777	1.00244	1.87012			87.44	1.53857	1.41895	3.75684	4.63818	11.3076
	97.74	0.618164	0.901855	1.46924	2.45605	5.19873			83.94	6.70703	6.93262	7.46484	8.07422	9.41211			20.04	0.223633	0.071777	1.00635	1.87012			87.54	1.52686	1.40332	3.75684	4.63819	11.3076
	97.84	0.612305	0.89209	1.46729	2.44043	5.18701			84.04	6.71288	6.93847	7.47851	8.08398	9.42187			20.14	0.223633	0.071777	1.01221	1.87012			87.64	1.52686	1.41016	3.75293	4.63428	11.3037
	97.94	0.612305	0.882324	1.46338	2.44531	5.19287			84.14	6.69336	6.92676	7.45508	8.10156	9.41211			20.24	0.233398	0.081543	1.02197	1.87988			87.74	1.52783	1.41992	3.76172	4.64502	11.3125
	98.04	0.602539	0.882324	1.46338	2.43848	5.18311			84.24	6.70508	6.94238	7.46094	8.08984	9.42188			20.34	0.233398	0.081543	1.01221	1.86816			87.84	1.53076	1.41895	3.76465	4.64697	11.3154
	98.14	0.602539	0.862793	1.45361	2.4209	5.18311			84.34	6.70703	6.95215	7.46289	8.09375	9.42383			20.44	0.237305	0.075684	1.01611	1.87207			87.94	1.53076	1.41699	3.76465	4.63818	11.3154
	98.24	0.602539	0.877441	1.46729	2.4248	5.18506			84.44	6.71289	6.95801	7.45703	8.09961	9.42578			20.54	0.243164	0.081543	1.01611	1.87793			88.04	1.53076	1.41895	3.76563	4.64404	11.3252
	98.34	0.592773	0.872559	1.46338	2.43066	5.19092			84.54	6.71289	6.96582	7.47266	8.09961	9.42578			20.64	0.243164	0.081543	1.02197	1.86816			88.14	1.52295	1.41895	3.76855	4.64404	11.3271
	98.44	0.59668	0.866699	1.46338	2.41113	5.18506			84.64	6.71094	6.94629	7.45898	8.10742	9.40625			20.74	0.243164	0.081543	1.00244	1.86816			88.24	1.521	1.4209	3.75488	4.63623	11.3135
	98.54	0.583008	0.856934	1.44189	2.40527	5.18115			84.74	6.71875	6.96191	7.46289	8.10449	9.41016			20.84	0.243164	0.085449	1.00244	1.86816			88.34	1.5249	1.42871	3.76074	4.64404	11.3213
	98.64	0.583008	0.856934	1.44189	2.40137	5.17529			84.84	6.73046	6.96777	7.47655	8.10742	9.42773			20.94	0.237305	0.095215	1.01025	1.87695			88.44	1.51709	1.41895	3.75684	4.64795	11.3232
	98.74	0.572266	0.85791	1.43115	2.39063	5.17627			84.94	6.73438	6.96387	7.46484	8.12109	9.41992			21.04	0.233398	0.091309	1.00049	1.87012			88.54	1.51123	1.40723	3.75684	4.64795	11.3096
	98.84	0.575195	0.845215	1.43018	2.38965	5.16943			85.04	6.73242	6.97266	7.46094	8.11328	9.41797			21.14	0.233398	0.081543	1.00049	1.87012			88.64	1.52197	1.42285	3.7666	4.64795	11.3213
	98.94	0.581055	0.85498	1.44385	2.39941	5.17432			85.14	6.74414	6.9873	7.47852	8.11914	9.42969			21.24	0.24707	0.091309	1.00049	1.87988			88.74	1.52686	1.41309	3.75684	4.63819	11.3096
	99.04	0.577148	0.851074	1.43604	2.38965	5.17139			85.24	6.74219	6.9834	7.46289	8.13086	9.41992			21.34	0.249023	0.091309	1.00049	1.87988			88.84	1.51904	1.41504	3.75879	4.63037	11.3135
	99.14	0.566406	0.841309	1.43018	2.37988	5.17139			85.34	6.74414	6.98145	7.47266	8.11523	9.42578			21.44	0.243164	0.091309	0.990723	1.87012			88.94	1.51709	1.41699	3.75098	4.63232	11.3125
	99.24	0.573242	0.841309	1.42041	2.37988	5.16162			85.44	6.74219	6.99121	7.4707	8.125	9.43359			21.54	0.243164	0.081543	0.994629	1.87012			89.04	1.52295	1.42871	3.7627	4.64404	11.3252
	99.34	0.55957	0.831543	1.40674	2.37988	5.16162			85.54	6.76465	6.98926	7.47656	8.12305	9.43359			21.64	0.233398	0.075684	0.990723	1.86035			89.14	1.53271	1.42773	3.77051	4.64795	11.3174
	99.44	0.545898	0.836426	1.40479	2.37012	5.16162			85.64	6.77148	7.00098	7.48047	8.12891	9.43555			21.74	0.24707	0.095215	0.994629	1.87793			89.24	1.52197	1.42969	3.76172	4.64697	11.3164
	99.54	0.551758	0.831543	1.40088	2.3623	5.16553			85.74	6.76758	7.01074	7.49023	8.13281	9.43945			21.84	0.237305	0.097168	1.00049	1.87598			89.34	1.53467	1.42871	3.75684	4.65186	11.3271
	99.64	0.551758	0.831543	1.40088	2.36816	5.16162			85.84	6.76172	7.00684	7.48633	8.14258	9.43945			21.94	0.235352	0.095215	0.994629	1.87402			89.44	1.55029	1.44434	3.77051	4.66748	11.3311
	99.74	0.545898	0.825684	1.40479	2.3584	5.16553			85.94	6.77734	7.02637	7.49023	8.13867	9.45703			22.04	0.241211	0.101074	1.00049	1.87988			89.54	1.54444	1.43653	3.77442	4.65772	11.3369
	99.84	0.541992	0.831543	1.40088	2.3584	5.17139			86.04	6.79297	7.03809	7.48828	8.16602	9.4668			22.14	0.241211	0.101074	0.990723	1.87988			89.64	1.55615	1.44238	3.77051	4.6665	11.335
	99.94	0.532227	0.821777	1.39697	2.34473	5.16162			86.14	6.78516	7.03418	7.48828	8.16992	9.46289			22.24	0.241211	0.101074	0.994629	1.87012			89.74	1.55029	1.44238	3.76563	4.66748	11.3311
	100.04	0.52832	0.817871	1.39209	2.33887	5.15771			86.24	6.77539	7.03809	7.49414	8.16211	9.46777			22.34	0.243164	0.103027	1.01221	1.88184			89.84	1.54053	1.43262	3.76074	4.67139	11.3252
	100.14	0.516602	0.802246	1.3833	2.3291	5.15576			86.34	6.78906	7.0498	7.50488	8.16406	9.48047			22.44	0.24707	0.106934	1.00244	1.87207			89.94	1.55713	1.43848	3.77832	4.6792	11.3408
	100.24	0.512695	0.796387	1.38721	2.3291	5.146			86.44	6.78125	7.04785	7.49805	8.17773	9.4668			22.54	0.25293	0.112793	1.00635	1.87207			90.04	1.54834	1.43848	3.7666	4.6792	11.3428
	100.34	0.508789	0.79834	1.38916	2.31543	5.14014			86.54	6.78125	7.04785	7.49805	8.17773	9.48242			22.64	0.243164	0.112793	1.00244	1.87598			90.14	1.55225	1.43262	3.77246	4.68506	11.3428
	100.44	0.50293	0.796387	1.38525	2.31934	5.1499			86.64	6.79297	7.06348	7.50195	8.17383	9.48828			22.74	0.235352	0.097168	0.998535	1.87793			90.24	1.54248	1.43652	3.76074	4.6792	11.3311
	100.54	0.49707	0.806152	1.38135	2.31445	5.16162			86.74	6.78906	7.05371	7.50781	8.17969	9.48438			22.84	0.237305	0.106934	0.996582	1.87012			90.34	1.52881	1.44238	3.7627	4.67725	11.333
	100.64	0.50293	0.802246	1.38525	2.32129	5.16162			86.84	6.78516	7.05762	7.51172	8.17969	9.49219			22.94	0.233398	0.101074	0.995605	1.88184			90.44	1.53271	1.43848	3.75293	4.67334	11.335
	100.74	0.491211	0.79834	1.37744	2.30762	5.1499			86.94	6.78711	7.05371	7.50586	8.16797	9.48633			23.04	0.243164	0.11084	1.01221	1.8916			90.54	1.52295	1.42773	3.75293	4.66357	11.3369
	100.84	0.491211	0.786621	1.36182	2.29199	5.15479			87.04	6.7832	7.05762	7.51367	8.17285	9.48633			23.14	0.243164	0.11084	1.01221	1.8916			90.64	1.52295	1.43066	3.74316	4.66943	11.3369
	100.94	0.491211	0.806152	1.36572	2.30566	5.18311			87.14	6.80469	7.06934	7.53125	8.17969	9.49023			23.24	0.243164	0.11084	1.01611	1.88379			90.74	1.53272	1.43848	3.75098	4.6792	11.3369
	101.04	0.485352	0.800293	1.37158	2.2998	5.18311			87.24	6.81445	7.06738	7.53711	8.19531	9.5			23.34	0.256836	0.124512	1.02588	1.90332			90.84	1.53271	1.4502	3.7627	4.68506	11.333
	101.14	0.481445	0.790527	1.36572	2.29395	5.18701			87.34	6.81348	7.07129	7.5293	8.20117	9.5			23.44	0.25293	0.135254	1.03174	1.90918			90.94	1.53271	1.44824	3.74707	4.67139	11.332
	101.24	0.477539	0.790527	1.36768	2.30566	5.20264			87.44	6.8125	7.07715	7.52734	8.20117	9.50586			23.54	0.25293	0.14209	1.02197	1.90918			91.04	1.53271	1.45996	3.7627	4.6792	11.3389
	101.34	0.461914	0.780762	1.36572	2.29004	5.20264			87.54	6.80859	7.07324	7.51953	8.20117	9.50586			23.64	0.25293	0.14209	1.02197	1.89941			91.14	1.52197	1.46094	3.75391	4.66455	11.3379
	101.44	0.46582	0.785645	1.36182	2.29004	5.21631			87.64	6.80469	7.06543	7.52539	8.19336	9.50586			23.74	0.25293	0.13623	1.02588	1.90723			91.24	1.51709	1.4541	3.74512	4.66846	11.333
	101.54	0.466797	0.787598	1.37061	2.28906	5.22705			87.74	6.81055	7.06934	7.51758	8.19922	9.50586			23.84	0.256836	0.14209	1.02197	1.90918			91.34	1.5249	1.45605	3.75488	4.67334	11.3271
	101.64	0.461914	0.782715	1.36963	2.2998	5.22607			87.84	6.80664	7.0752	7.52734	8.20313	9.50586			23.94	0.262695	0.14209	1.02588	1.90918			91.44	1.54443	1.46191	3.76465	4.68896	11.3408
	101.74	0.466797	0.776855	1.37451	2.29395	5.23193			87.94	6.8125	7.0791	7.53125	8.20117	9.50977			24.04	0.272461	0.151855	1.03174	1.91895			91.54	1.53662	1.46192	3.76074	4.67725	11.3428
	101.84	0.458008	0.769043	1.36768	2.2959	5.22803			88.04	6.80469	7.0752	7.52539	8.20117	9.50977			24.14	0.262695	0.151855	1.03174	1.92285			91.64	1.54736	1.46777	3.76074	4.6792	11.3506
	101.94	0.456055	0.776855	1.36182	2.2998	5.23584			88.14	6.80664	7.07617	7.52148	8.19336	9.51953			24.24	0.266602	0.159668	1.02979	1.93262			91.74	1.54639	1.46192	3.7666	4.68311	11.3604
	102.04	0.461914	0.784668	1.36572	2.2998	5.25146			88.24	6.8203	7.10839	7.53905	8.21484	9.5371			24.34	0.272461	0.161621	1.0415	1.93848			91.84	1.55811	1.45801	3.77246	4.69482	11.3721
	102.14	0.461914	0.780762	1.36182	2.2998	5.25537			88.34	6.82422	7.09668	7.54492	8.2207	9.54492			24.44	0.272461	0.161621	1.03174	1.93457			91.94	1.55225	1.46191	3.77441	4.69287	11.376
	102.24	0.461914	0.780762	1.37158	2.2998	5.26709			88.44	6.8418	7.10449	7.54492	8.2168	9.55273			24.54	0.282227	0.161621	1.0415	1.93262			92.04	1.54639	1.4668	3.7793	4.69678	11.3701
	102.34	0.461914	0.770996	1.36182	2.29004	5.24951			88.54	6.84473	7.11328	7.5498	8.23242	9.56152			24.64	0.282227	0.161621	1.0415	1.93848			92.14	1.54834	1.46387	3.78223	4.68701	11.3721
	102.44	0.456055	0.765137	1.35596	2.29004	5.25342			88.64	6.84277	7.11914	7.55566	8.24316	9.56738			24.74	0.295898	0.165527	1.03564	1.94238			92.24	1.54248	1.45996	3.78809	4.68896	11.3779
	102.54	0.47168	0.770996	1.37158	2.28809	5.26904			88.74	6.83496	7.11133	7.5498	8.24902	9.5791			24.84	0.291992	0.171387	1.0415	1.94824			92.34	1.53271	1.45801	3.78809	4.68896	11.3662
	102.64	0.461914	0.774902	1.36572	2.29199	5.26904			88.84	6.85742	7.11816	7.56543	8.23535	9.57813			24.94	0.288086	0.161621	1.0415	1.93457			92.44	1.52881	1.46973	3.78418	4.68896	11.3721
	102.74	0.458008	0.776855	1.35791	2.28418	5.26904			88.94	6.85449	7.11719	7.56348	8.24609	9.58105			25.04	0.295898	0.175293	1.05518	1.94238			92.54	1.51709	1.45801	3.77832	4.68702	11.3701
	102.84	0.442383	0.765137	1.35596	2.28223	5.26904			89.04	6.84375	7.1084	7.55664	8.24316	9.56641			25.14	0.301758	0.181152	1.05127	1.94824			92.64	1.5249	1.47363	3.79199	4.68701	11.376
	102.94	0.446289	0.780762	1.36377	2.28809	5.27881			89.14	6.83789	7.1084	7.56055	8.23242	9.57422			25.24	0.307617	0.181152	1.06104	1.95215			92.74	1.53272	1.47949	3.79785	4.69385	11.3916
	103.04	0.452148	0.770996	1.35986	2.28809	5.28369			89.24	6.83496	7.11133	7.57129	8.23828	9.57129			25.34	0.301758	0.181152	1.06104	1.96777			92.84	1.52881	1.48145	3.80371	4.70654	11.3936
	103.14	0.438477	0.76709	1.35986	2.27832	5.28662			89.34	6.84277	7.11816	7.57813	8.24316	9.57422			25.44	0.305664	0.181152	1.04932	1.95801			92.94	1.51709	1.46777	3.80176	4.70459	11.3877
	103.24	0.430664	0.766113	1.35986	2.27832	5.29443			89.44	6.8418	7.12207	7.57813	8.24219	9.57813			25.54	0.311523	0.175293	1.05322	1.95801			93.04	1.52295	1.47754	3.79785	4.70069	11.3906
	103.34	0.43457	0.772949	1.35986	2.27832	5.30029			89.54	6.8457	7.13574	7.57813	8.24023	9.58984			25.64	0.321289	0.190918	1.05908	1.96289			93.14	1.53174	1.49219	3.80273	4.69775	11.4121
	103.44	0.436523	0.76709	1.35986	2.28906	5.29639			89.64	6.85156	7.12793	7.58203	8.24414	9.59961			25.74	0.311523	0.190918	1.06299	1.96973			93.24	1.51904	1.48145	3.79004	4.70069	11.3955
	103.54	0.420898	0.765137	1.3501	2.28027	5.29443			89.74	6.85547	7.13184	7.58789	8.25	9.5957			25.84	0.311523	0.190918	1.05908	1.96973			93.34	1.521	1.48438	3.79199	4.69482	11.3975
	103.64	0.422852	0.782715	1.36182	2.29199	5.30811			89.84	6.85352	7.1377	7.58398	8.25	9.59961			25.94	0.316406	0.186035	1.06396	1.96484			93.44	1.50146	1.47559	3.77637	4.66943	11.3877
	103.74	0.416992	0.772949	1.35693	2.2959	5.30615			89.94	6.84961	7.1377	7.59766	8.24219	9.59961			26.04	0.333008	0.202637	1.0708	1.98145			93.54	1.50147	1.47754	3.79004	4.68311	11.4111
	103.84	0.432617	0.782715	1.36377	2.30176	5.32178			90.04	6.84961	7.1377	7.59375	8.22656	9.60156			26.14	0.328125	0.197754	1.06982	1.97656			93.64	1.49463	1.4834	3.7959	4.69287	11.417
	103.94	0.422852	0.772949	1.36768	2.30176	5.32568			90.14	6.85742	7.14941	7.60352	8.22754	9.60742			26.24	0.321289	0.179199	1.05908	1.97363			93.74	1.49756	1.47363	3.79199	4.69678	11.4072
	104.04	0.436523	0.776855	1.37354	2.30176	5.34131			90.24	6.85938	7.14551	7.60938	8.24414	9.60742			26.34	0.331055	0.194824	1.05908	1.97949			93.84	1.48584	1.47363	3.78027	4.69678	11.4053
	104.14	0.432617	0.772949	1.37744	2.29199	5.34131			90.34	6.85156	7.1416	7.59766	8.24023	9.60449			26.44	0.331055	0.188965	1.05908	1.97949			93.94	1.47803	1.46387	3.79199	4.69678	11.4014
	104.24	0.438477	0.778809	1.37744	2.29004	5.35107			90.44	6.85547	7.15137	7.59766	8.23242	9.60742			26.54	0.342773	0.200684	1.06592	1.98145			94.04	1.48584	1.46192	3.78418	4.69678	11.4053
	104.34	0.422852	0.76709	1.37158	2.29004	5.35107			90.54	6.86133	7.15723	7.59375	8.23242	9.60742			26.64	0.333008	0.200684	1.07275	1.98145			94.14	1.48975	1.46387	3.7959	4.69873	11.417
	104.44	0.433594	0.769043	1.36768	2.2959	5.35693			90.64	6.85352	7.15723	7.60742	8.23242	9.60742			26.74	0.342773	0.210449	1.08252	1.97949			94.24	1.49561	1.46387	3.80567	4.7085	11.4307
	104.54	0.43457	0.76709	1.36572	2.28418	5.35107			90.74	6.85156	7.14551	7.60742	8.22461	9.59961			26.84	0.34668	0.200684	1.08252	1.97949			94.34	1.50146	1.46777	3.80566	4.70166	11.4268
	104.64	0.422852	0.759277	1.35791	2.27637	5.35107			90.84	6.83203	7.14258	7.5918	8.23047	9.58789			26.94	0.352539	0.190918	1.08252	1.99121			94.44	1.47803	1.45996	3.80664	4.7085	11.4268
	104.74	0.432617	0.751465	1.35205	2.28027	5.36475			90.94	6.83203	7.1377	7.59766	8.22266	9.58789			27.04	0.358398	0.20459	1.08643	1.98926			94.54	1.48194	1.46778	3.82715	4.71826	11.4404
	104.84	0.432617	0.751465	1.36572	2.29395	5.38037			91.04	6.8418	7.1377	7.59766	8.21875	9.58789			27.14	0.352539	0.196777	1.07861	1.97559			94.64	1.48193	1.46191	3.81738	4.72217	11.4463
	104.94	0.436523	0.751465	1.36182	2.29004	5.38037			91.14	6.84668	7.1377	7.60156	8.22266	9.58789			27.24	0.338867	0.190918	1.07666	1.97363			94.74	1.48389	1.46387	3.8291	4.73975	11.457
	105.04	0.442383	0.76123	1.36572	2.2998	5.39014			91.24	6.85352	7.14551	7.60742	8.23047	9.59961			27.34	0.34082	0.194824	1.08643	1.9834			94.84	1.48193	1.4541	3.81934	4.72998	11.4678
	105.14	0.452148	0.765137	1.38135	2.2998	5.40381			91.34	6.8457	7.14746	7.60742	8.22656	9.5957			27.44	0.352539	0.190918	1.08057	1.98926			94.94	1.48584	1.45801	3.81738	4.72412	11.4717
	105.24	0.441406	0.756348	1.3667	2.28516	5.40479			91.44	6.85156	7.15137	7.60742	8.2207	9.59961			27.54	0.352539	0.194824	1.08057	1.97949			95.04	1.4917	1.46191	3.82715	4.7417	11.4971
	105.34	0.44043	0.753418	1.3501	2.28223	5.38818			91.54	6.84766	7.1377	7.59277	8.2207	9.58398			27.64	0.362305	0.210449	1.09033	1.99316			95.14	1.4917	1.46289	3.81738	4.74365	11.4873
	105.44	0.448242	0.757324	1.3501	2.28613	5.40576			91.64	6.86133	7.14941	7.60742	8.21289	9.59766			27.74	0.348633	0.196777	1.07666	1.98535			95.24	1.49365	1.46582	3.8291	4.75342	11.499
	105.54	0.436523	0.751465	1.3501	2.27441	5.40479			91.74	6.8457	7.1377	7.59961	8.21289	9.57813			27.84	0.356445	0.194824	1.07471	1.9834			95.34	1.49756	1.46973	3.8291	4.74951	11.4932
	105.64	0.442383	0.755371	1.35986	2.29004	5.41162			91.84	6.85156	7.12988	7.59961	8.20508	9.57813			27.94	0.362305	0.214355	1.08447	1.98926			95.44	1.50635	1.48047	3.82422	4.7583	11.5039
	105.74	0.446289	0.751465	1.3501	2.29004	5.41162			91.94	6.83984	7.13965	7.60938	8.20703	9.57031			28.04	0.362305	0.210449	1.09033	1.98926			95.54	1.50439	1.46777	3.81543	4.74756	11.499
	105.84	0.448242	0.757324	1.35986	2.28418	5.42139			92.04	6.85156	7.14355	7.60938	8.19922	9.58008			28.14	0.366211	0.210449	1.08057	1.98926			95.64	1.50732	1.46777	3.81543	4.74658	11.501
	105.94	0.442383	0.741699	1.35986	2.28223	5.42139			92.14	6.84375	7.1377	7.60938	8.20703	9.57617			28.24	0.37207	0.200684	1.08057	1.98926			95.74	1.50537	1.45606	3.80567	4.7378	11.499
	106.04	0.446289	0.744629	1.35986	2.28809	5.42139			92.24	6.86523	7.14551	7.61719	8.20898	9.5957			28.34	0.37207	0.200684	1.08447	1.97949			95.94	1.51318	1.46973	3.81348	4.74561	11.5166
	106.14	0.452148	0.751465	1.35498	2.29297	5.42139			92.34	6.87109	7.15332	7.60938	8.2207	9.59961			28.44	0.381836	0.215332	1.09033	1.98926			96.04	1.51319	1.46778	3.81153	4.74365	11.5107
	106.24	0.454102	0.751465	1.37158	2.2998	5.43506			92.44	6.85547	7.14746	7.60156	8.21289	9.58008			28.54	0.381836	0.210449	1.09033	1.98926			96.14	1.521	1.46973	3.82129	4.74365	11.5273
	106.34	0.459961	0.76123	1.38135	2.31348	5.45068			92.54	6.86133	7.15918	7.61523	8.20508	9.58789			28.64	0.381836	0.210449	1.08057	1.9834			96.24	1.53076	1.47168	3.8252	4.75147	11.5361
	106.44	0.464844	0.755371	1.37549	2.30957	5.45459			92.64	6.85352	7.15137	7.59375	8.21094	9.57617			28.74	0.395508	0.220215	1.09033	1.99902			96.34	1.53467	1.46582	3.8291	4.74756	11.5361
	106.54	0.477539	0.76709	1.37744	2.30566	5.45654			92.74	6.87109	7.16113	7.60742	8.19922	9.5918			28.84	0.397461	0.224121	1.08447	1.98926			96.44	1.54443	1.46191	3.8252	4.75146	11.54
	106.64	0.47168	0.755371	1.37158	2.29395	5.45459			92.84	6.86816	7.16699	7.61133	8.19922	9.59766			28.94	0.391602	0.22998	1.09033	1.98926			96.54	1.55811	1.46973	3.83691	4.76904	11.5439
	106.74	0.47168	0.770996	1.37158	2.30957	5.47021			92.94	6.87109	7.16699	7.60742	8.19531	9.59766			29.04	0.391602	0.226074	1.09033	1.98926			96.64	1.55615	1.46777	3.83691	4.75928	11.5322
	106.84	0.483398	0.776855	1.37744	2.31152	5.48584			93.04	6.85156	7.16016	7.57617	8.19727	9.58984			29.14	0.391602	0.214355	1.08057	1.98926			96.74	1.56787	1.46777	3.83789	4.75732	11.5439
	106.94	0.483398	0.79248	1.39307	2.31152	5.50146			93.14	6.85547	7.15918	7.58398	8.19336	9.58789			29.24	0.381836	0.216309	1.08057	1.97363			96.84	1.56592	1.4668	3.83691	4.74756	11.5303
	107.04	0.467773	0.772949	1.38721	2.29395	5.4917			93.24	6.86133	7.16699	7.57813	8.19922	9.58789			29.34	0.381836	0.210449	1.08057	1.96777			96.94	1.57178	1.47363	3.82715	4.75146	11.5361
	107.14	0.483398	0.786621	1.39307	2.31348	5.4917			93.34	6.86523	7.1709	7.58594	8.1875	9.58789			29.44	0.381836	0.210449	1.08057	1.97168			97.04	1.58252	1.48535	3.83887	4.76514	11.5439
	107.24	0.473633	0.788574	1.37744	2.30566	5.48779			93.44	6.875	7.19238	7.58203	8.2041	9.60156			29.54	0.391602	0.214355	1.07861	1.97754			97.14	1.5835	1.47559	3.83887	4.76416	11.5283
	107.34	0.487305	0.796387	1.38525	2.30957	5.48193			93.54	6.87695	7.17871	7.58008	8.21875	9.5957			29.64	0.391602	0.220215	1.08252	1.97754			97.54	1.5835	1.47754	3.83105	4.76318	11.5107
	107.44	0.483398	0.79248	1.39111	2.2998	5.48584			93.64	6.89063	7.19824	7.58594	8.21094	9.5957			29.74	0.407227	0.231934	1.09033	1.98926			97.64	1.57275	1.47852	3.82227	4.75439	11.502
	107.54	0.483398	0.79248	1.40479	2.30371	5.50146			93.74	6.87109	7.18262	7.57813	8.23047	9.59961			29.84	0.413086	0.222168	1.09033	1.98926			97.74	1.58154	1.4873	3.83105	4.76318	11.5107
	107.64	0.483398	0.782715	1.40088	2.30957	5.50146			93.84	6.875	7.19629	7.57813	8.22266	9.60547			29.94	0.413086	0.222168	1.09424	1.97949			97.84	1.58154	1.47949	3.83301	4.75537	11.5068
	107.74	0.469727	0.770996	1.39697	2.2959	5.4917			93.94	6.86133	7.17676	7.57031	8.24023	9.60156			30.04	0.397461	0.218262	1.09619	1.97559			97.94	1.58545	1.4873	3.83105	4.75732	11.5146
	107.84	0.473633	0.780762	1.39502	2.29395	5.50146			94.04	6.86133	7.19238	7.56836	8.22461	9.60742			30.14	0.391602	0.202637	1.08057	1.96973			98.04	1.59131	1.50293	3.84863	4.771	11.5283
	107.94	0.475586	0.784668	1.40088	2.30957	5.50146			94.14	6.86133	7.19824	7.56836	8.23047	9.60059			30.24	0.401367	0.216309	1.09033	1.97363			98.14	1.59521	1.49512	3.84473	4.771	11.5244
	108.04	0.481445	0.790527	1.40088	2.30371	5.51611			94.24	6.86133	7.19043	7.56641	8.23047	9.60742			30.34	0.391602	0.222168	1.09521	1.97949			98.34	1.60107	1.51465	3.84668	4.78271	11.5283
	108.14	0.477539	0.786621	1.40674	2.31543	5.52881			94.34	6.86523	7.19629	7.57031	8.23438	9.61133			30.44	0.391602	0.222168	1.09229	1.96973			98.44	1.60498	1.52441	3.85059	4.79834	11.542
	108.24	0.485352	0.784668	1.40088	2.30957	5.52295			94.44	6.87109	7.19629	7.57617	8.24023	9.61719			30.54	0.395508	0.216309	1.09229	1.97363			98.74	1.6167	1.52246	3.85059	4.79248	11.5361
	108.34	0.481445	0.780762	1.40479	2.30469	5.52686			94.54	6.86328	7.2041	7.56445	8.24023	9.625			30.64	0.401367	0.231934	1.10205	1.98926			98.84	1.62744	1.52441	3.86133	4.80225	11.5381
	108.44	0.489258	0.783691	1.40869	2.30762	5.52881			94.64	6.85938	7.19043	7.55859	8.24023	9.60742			30.74	0.401367	0.218262	1.09229	1.97949			98.94	1.62256	1.52441	3.8584	4.80811	11.542
	108.54	0.483398	0.794434	1.4126	2.31152	5.53662			94.74	6.86719	7.2041	7.55566	8.22852	9.61133			30.84	0.401367	0.206543	1.09619	1.9834			99.04	1.62256	1.51465	3.8584	4.8042	11.5439
	108.64	0.482422	0.783691	1.39795	2.30078	5.5376			94.84	6.87305	7.20605	7.56836	8.23633	9.61719			30.94	0.391602	0.212402	1.09229	1.98926			99.24	1.62646	1.5166	3.87207	4.81006	11.5498
	108.74	0.491211	0.782715	1.396	2.30957	5.54053			94.94	6.85938	7.18652	7.55664	8.23828	9.60938			31.04	0.405273	0.212402	1.10205	1.98926			99.54	1.62256	1.52051	3.88379	4.81592	11.5635
	108.84	0.481445	0.786621	1.40283	2.2998	5.54443			95.04	6.85547	7.17871	7.54883	8.22266	9.61914			31.14	0.401367	0.206543	1.09229	1.97949			99.64	1.63232	1.52832	3.8877	4.81982	11.5674
	108.94	0.495117	0.802246	1.40088	2.2998	5.56006			95.14	6.85742	7.19043	7.53711	8.22852	9.61523			31.24	0.401367	0.222168	1.09619	1.97949			99.74	1.62158	1.5293	3.88672	4.80908	11.5664
	109.04	0.500977	0.790527	1.40479	2.30957	5.56982			95.24	6.86133	7.19629	7.54102	8.22852	9.62305			31.34	0.387695	0.210449	1.09814	1.98047			99.84	1.62061	1.52637	3.88574	4.82178	11.5752
	109.14	0.500977	0.780762	1.41064	2.2998	5.57373			95.34	6.86914	7.20801	7.54688	8.22461	9.63672			31.44	0.390625	0.214355	1.08643	1.98535			99.94	1.62061	1.52637	3.88574	4.82373	11.5693
	109.24	0.487305	0.770996	1.40088	2.2959	5.57568			95.44	6.86621	7.21191	7.55469	8.23828	9.64063			31.54	0.399414	0.220215	1.09229	1.9873			100.04	1.62061	1.52637	3.88574	4.81787	11.5654
	109.34	0.485352	0.774902	1.40088	2.28418	5.56396			95.54	6.86523	7.21777	7.55664	8.23535	9.64063			31.64	0.393555	0.210449	1.08252	1.96973			100.14	1.62451	1.53223	3.89551	4.83154	11.5703
	109.44	0.487305	0.786621	1.39697	2.2959	5.57959			95.64	6.87109	7.21777	7.54883	8.24219	9.64258			31.74	0.393555	0.225098	1.09229	1.9834			100.24	1.63135	1.53809	3.90137	4.84326	11.583
	109.54	0.491211	0.780762	1.40479	2.29395	5.58936			95.74	6.88281	7.22559	7.56055	8.24219	9.64844			31.84	0.393555	0.231934	1.09619	1.98926			100.34	1.63232	1.53711	3.89941	4.82764	11.5811
	109.64	0.491211	0.774902	1.40088	2.29004	5.5835			95.84	6.86719	7.21777	7.54102	8.24219	9.65234			31.94	0.393555	0.222168	1.10205	1.97949			100.44	1.63623	1.53418	3.89551	4.83154	11.5869
	109.74	0.485352	0.786621	1.39697	2.2998	5.59521			95.94	6.86914	7.21387	7.54688	8.24219	9.64648			32.04	0.389648	0.222168	1.08643	1.96582			100.54	1.62842	1.53418	3.89551	4.8374	11.5869
	109.84	0.469727	0.76123	1.39502	2.28809	5.57959			96.04	6.87305	7.22266	7.54688	8.23047	9.64648			32.14	0.374023	0.212402	1.08057	1.96387			100.64	1.61084	1.52832	3.8916	4.8335	11.5869
	109.94	0.474609	0.770996	1.41064	2.29199	5.58936			96.14	6.87695	7.22949	7.54297	8.23438	9.65039			32.24	0.374023	0.212402	1.08447	1.96973			100.74	1.59912	1.51074	3.87403	4.82569	11.585
	110.04	0.481445	0.763184	1.40088	2.29785	5.59326			96.24	6.87109	7.22949	7.54883	8.24414	9.64648			32.34	0.366211	0.206543	1.08447	1.96387			100.84	1.60693	1.51855	3.88086	4.82178	11.5986
	110.14	0.493164	0.774902	1.40283	2.30957	5.60107			96.34	6.875	7.22949	7.54883	8.24023	9.65039			32.44	0.37207	0.216309	1.09033	1.96973			100.94	1.60303	1.52441	3.8877	4.82764	11.6006
	110.24	0.489258	0.776855	1.4126	2.31934	5.61182			96.44	6.88086	7.2334	7.54883	8.24805	9.65039			32.54	0.381836	0.222168	1.09424	1.97363			101.04	1.61279	1.52051	3.89746	4.8335	11.6123
	110.34	0.487305	0.775879	1.41064	2.30957	5.62256			96.54	6.86914	7.22754	7.52539	8.25	9.63672			32.64	0.385742	0.23584	1.104	1.96973			101.14	1.60107	1.50684	3.89746	4.83252	11.6104
	110.44	0.493164	0.782715	1.41455	2.31348	5.62256			96.64	6.86914	7.23145	7.54102	8.24219	9.64844			32.74	0.381836	0.231934	1.10986	1.97363			101.24	1.61084	1.51855	3.90332	4.84521	11.6221
	110.54	0.483398	0.776855	1.41064	2.30957	5.61279			96.74	6.87695	7.24902	7.54688	8.25977	9.6582			32.84	0.381836	0.231934	1.1001	1.97949			101.34	1.60303	1.50879	3.90332	4.83545	11.6123
	110.64	0.479492	0.778809	1.41064	2.30566	5.62256			96.84	6.86719	7.24902	7.54688	8.25977	9.6543			32.94	0.391602	0.241699	1.10986	1.97949			101.44	1.59326	1.51855	3.90918	4.84131	11.6182
	110.74	0.477539	0.772949	1.41064	2.30371	5.62256			96.94	6.875	7.24707	7.54297	8.25977	9.65039			33.04	0.381836	0.23584	1.1001	1.9834			101.54	1.58838	1.50977	3.9043	4.83838	11.6172
	110.84	0.483398	0.776855	1.41064	2.30957	5.62646			97.04	6.87305	7.25098	7.54883	8.25586	9.65625			33.14	0.395508	0.251465	1.10986	1.98926			101.64	1.5835	1.5166	3.90527	4.84717	11.6357
	110.94	0.489258	0.782715	1.4165	2.31543	5.63818			97.14	6.87305	7.25098	7.54883	8.26172	9.66406			33.24	0.387695	0.241699	1.10107	1.98535			101.74	1.58936	1.51074	3.90918	4.84131	11.6338
	111.04	0.481445	0.782715	1.41064	2.31445	5.62061			97.24	6.88672	7.24902	7.5625	8.26172	9.66797			33.34	0.381836	0.241699	1.10205	1.96973			101.84	1.5835	1.51465	3.91895	4.84717	11.6387
	111.14	0.481445	0.786621	1.40479	2.30957	5.62451			97.34	6.90039	7.26074	7.56836	8.26367	9.67578			33.44	0.393555	0.253418	1.104	1.98145			101.94	1.58545	1.51172	3.9209	4.8374	11.6416
	111.24	0.485352	0.790527	1.42041	2.31934	5.63428			97.44	6.88867	7.2666	7.56445	8.26953	9.67578			33.54	0.393555	0.241699	1.104	1.97363			102.04	1.59619	1.52441	3.92676	4.84912	11.6475
	111.34	0.493164	0.796387	1.42236	2.3252	5.65186			97.54	6.90527	7.25879	7.57227	8.26953	9.68066			33.64	0.393555	0.245605	1.10791	1.97949			102.14	1.59912	1.52051	3.92676	4.8335	11.6436
	111.44	0.489258	0.788574	1.42334	2.31738	5.64209			97.64	6.9043	7.25879	7.57813	8.26953	9.69141			33.74	0.393555	0.26123	1.11377	1.97949			102.24	1.5835	1.51855	3.92676	4.83154	11.6416
	111.54	0.473633	0.786621	1.41455	2.31152	5.63232			97.74	6.91602	7.25098	7.58301	8.27734	9.6875			33.84	0.393555	0.26123	1.11768	1.9834			102.34	1.58154	1.52051	3.92285	4.82373	11.6436
	111.64	0.483398	0.79248	1.42432	2.31543	5.646			97.84	6.91406	7.25684	7.58984	8.2793	9.68359			33.94	0.397461	0.251465	1.12354	1.97949			102.44	1.58154	1.50684	3.91504	4.81787	11.6416
	111.74	0.46875	0.781738	1.41943	2.30664	5.63721			97.94	6.91016	7.25684	7.57813	8.27539	9.68555			34.04	0.40332	0.251465	1.11182	1.97949			102.54	1.57178	1.50879	3.90137	4.81787	11.6416
	111.84	0.47168	0.780762	1.4165	2.30957	5.63428			98.04	6.91797	7.25293	7.58203	8.28906	9.69336			34.14	0.399414	0.26123	1.11768	1.99023			102.64	1.5835	1.51465	3.90137	4.81982	11.6514
	111.94	0.46582	0.775879	1.42236	2.30957	5.63037			98.14	6.91992	7.25488	7.57617	8.28906	9.69531			34.24	0.383789	0.255371	1.11182	1.99121			102.74	1.57764	1.49903	3.89746	4.80811	11.6475
	112.04	0.477539	0.788574	1.42822	2.30957	5.63623			98.24	6.92773	7.25879	7.58398	8.28906	9.70313			34.34	0.383789	0.26123	1.11572	1.98145			102.84	1.58936	1.51074	3.89746	4.81396	11.6572
	112.14	0.47168	0.782715	1.42041	2.30957	5.63525			98.34	6.92969	7.25488	7.58594	8.29297	9.70508			34.44	0.393555	0.26123	1.12158	1.99512			102.94	1.57178	1.49316	3.89746	4.79834	11.6572
	112.24	0.47168	0.796387	1.43408	2.31348	5.64014			98.44	6.92188	7.24707	7.59375	8.28711	9.70898			34.54	0.387695	0.266113	1.12158	2.00098			103.04	1.57178	1.48926	3.89649	4.79444	11.6572
	112.34	0.477539	0.796387	1.43604	2.31543	5.64014			98.54	6.93359	7.25488	7.60742	8.29102	9.7207			34.64	0.381836	0.272949	1.11572	2.00098			103.14	1.57568	1.49707	3.89746	4.80225	11.667
	112.44	0.47168	0.784668	1.42041	2.31348	5.64014			98.64	6.93164	7.25098	7.5918	8.30371	9.70703			34.74	0.381836	0.26709	1.12158	1.99121			103.24	1.58154	1.49317	3.89746	4.80811	11.667
	112.54	0.47168	0.800293	1.43408	2.31738	5.64404			98.74	6.93945	7.26465	7.60547	8.29883	9.71875			34.84	0.381836	0.272949	1.12158	2.00488			103.34	1.58545	1.49707	3.89746	4.81299	11.667
	112.64	0.463867	0.790527	1.43018	2.32129	5.6499			98.84	6.93555	7.26855	7.60938	8.31055	9.72852			34.94	0.381836	0.276855	1.11572	2.01074			103.44	1.58936	1.50098	3.88965	4.81592	11.6631
	112.74	0.477539	0.79248	1.44189	2.3252	5.64795			98.94	6.9375	7.26465	7.60938	8.31445	9.7168			35.04	0.385742	0.282715	1.13135	2.01074			103.54	1.5874	1.49903	3.88965	4.81006	11.6572
	112.84	0.47168	0.79248	1.43213	2.30957	5.646			99.04	6.94141	7.26855	7.61914	8.30859	9.70898			35.14	0.391602	0.272949	1.12158	2.01465			103.64	1.59131	1.50488	3.88184	4.81006	11.6709
	112.94	0.47168	0.79248	1.43799	2.31934	5.64795			99.14	6.94531	7.28027	7.62695	8.32031	9.72656			35.24	0.391602	0.276855	1.12549	2.01074			103.74	1.57764	1.49902	3.88379	4.81006	11.6729
	113.04	0.481445	0.802246	1.43604	2.31934	5.646			99.24	6.95117	7.2832	7.63086	8.32031	9.72656			35.34	0.391602	0.270996	1.12158	2.00098			103.84	1.57178	1.49316	3.87793	4.81396	11.667
	113.14	0.477539	0.79834	1.43799	2.3252	5.65771			99.34	6.95117	7.28613	7.625	8.32031	9.73047			35.44	0.391602	0.284668	1.13525	2.01465			103.94	1.5708	1.48242	3.86328	4.80518	11.6621
	113.24	0.47168	0.796387	1.44189	2.33398	5.65576			99.44	6.95508	7.29004	7.62891	8.32422	9.73633			35.54	0.385742	0.290527	1.13135	2.02051			104.04	1.56983	1.48145	3.86035	4.80225	11.6553
	113.34	0.47168	0.79248	1.43213	2.33105	5.66162			99.54	6.96094	7.30176	7.64063	8.33008	9.73633			35.64	0.391602	0.284668	1.13623	2.00879			104.14	1.56787	1.48438	3.87402	4.81396	11.6572
	113.44	0.475586	0.790527	1.44189	2.33496	5.66162			99.64	6.96484	7.31543	7.6543	8.3418	9.74414			35.74	0.387695	0.296387	1.13721	2.01855			104.24	1.57666	1.49512	3.87988	4.81787	11.6768
	113.54	0.487305	0.796387	1.43994	2.33691	5.66162			99.74	6.95605	7.29004	7.63379	8.34961	9.72656			35.84	0.381836	0.284668	1.12158	2.00879			104.34	1.58154	1.4873	3.87598	4.81787	11.6748
	113.64	0.47168	0.784668	1.43018	2.33496	5.66162			99.84	6.95508	7.29004	7.64063	8.35352	9.71875			35.94	0.381836	0.290527	1.12158	2.00879			104.44	1.57178	1.49316	3.87988	4.81201	11.6748
	113.74	0.467773	0.786621	1.43604	2.34668	5.66748			99.94	6.9668	7.28223	7.63672	8.34766	9.71484			36.04	0.381836	0.294434	1.12549	2.00879			104.54	1.56201	1.49317	3.87207	4.81397	11.6748
	113.84	0.476563	0.780762	1.43018	2.34082	5.65967			100.04	6.98047	7.2959	7.64844	8.3457	9.72656			36.14	0.381836	0.300293	1.13135	2.0127			104.64	1.57178	1.50293	3.87598	4.81396	11.6846
	113.94	0.473633	0.780762	1.42432	2.3291	5.65381			100.14	6.98828	7.28809	7.64453	8.35938	9.73145			36.24	0.375977	0.290527	1.12158	2.00879			104.74	1.56983	1.50098	3.87403	4.80615	11.6826
	114.04	0.469727	0.778809	1.43799	2.34082	5.66748			100.24	6.98242	7.2959	7.64648	8.35156	9.72656			36.34	0.393555	0.307129	1.13721	2.02051			104.84	1.57764	1.49902	3.87012	4.80615	11.6865
	114.14	0.463867	0.763184	1.42236	2.33105	5.64209			100.34	6.98633	7.29199	7.6543	8.34766	9.72266			36.44	0.379883	0.310059	1.13916	2.00684			104.94	1.58154	1.51465	3.87598	4.79443	11.6914
	114.24	0.477539	0.76709	1.43213	2.34473	5.64697			100.44	6.99609	7.30566	7.66797	8.35156	9.74414			36.54	0.37793	0.304199	1.12744	2.00098			105.04	1.5874	1.5127	3.88184	4.79443	11.7041
	114.34	0.473633	0.763184	1.42725	2.34082	5.64404			100.54	6.99805	7.30371	7.67188	8.33984	9.73828			36.64	0.381836	0.304199	1.13721	2.00488			105.14	1.58154	1.5127	3.86621	4.7749	11.6963
	114.44	0.478516	0.758301	1.43896	2.34961	5.64893			100.64	7.01172	7.31738	7.67188	8.34375	9.75391			36.74	0.381836	0.308105	1.14307	2.01074			105.24	1.57178	1.5127	3.86231	4.76904	11.6924
	114.54	0.480469	0.766113	1.43701	2.35352	5.64697			100.74	7.02734	7.33301	7.68945	8.33984	9.76758			36.84	0.381836	0.308105	1.1333	2.00098			105.34	1.5835	1.52441	3.87207	4.78076	11.6982
	114.64	0.493164	0.774902	1.44385	2.37012	5.65771			100.84	7.0293	7.32715	7.68945	8.35547	9.7793			36.94	0.381836	0.32373	1.14697	2.01074			105.44	1.59326	1.53809	3.8877	4.79053	11.7119
	114.74	0.478516	0.766113	1.44287	2.35938	5.64697			100.94	7.02539	7.33105	7.69922	8.35742	9.77734			37.04	0.381836	0.313965	1.14307	2.01074			105.54	1.58936	1.53027	3.88184	4.77393	11.7139
	114.84	0.475586	0.76416	1.43018	2.3584	5.64014			101.04	7.02734	7.33691	7.6875	8.34961	9.77734			37.14	0.37207	0.317871	1.14697	2.00586			105.64	1.58545	1.52832	3.87598	4.73975	11.708
	114.94	0.477539	0.776855	1.43604	2.3584	5.6499			101.14	7.03516	7.3291	7.6875	8.36133	9.78125			37.24	0.376953	0.328613	1.15186	2.01758			105.74	1.59522	1.53614	3.87989	4.73487	11.708
	115.04	0.475586	0.770996	1.43994	2.37305	5.6499			101.24	7.04102	7.33887	7.6875	8.35938	9.78711			37.34	0.360352	0.312012	1.15088	2.01074			105.84	1.60107	1.55176	3.89551	4.79248	11.7217
	115.14	0.473633	0.76123	1.42627	2.36621	5.646			101.34	7.04102	7.33496	7.6875	8.36426	9.79102			37.44	0.365234	0.312012	1.13916	2.01074			105.94	1.60889	1.56445	3.90332	4.76172	11.7354
	115.24	0.469727	0.774902	1.42432	2.36426	5.65771			101.44	7.04102	7.33887	7.69141	8.37109	9.79688			37.54	0.37207	0.325684	1.13916	2.00879			106.44	1.57959	1.58301	3.90527	4.80322	11.7354
	115.34	0.493164	0.79248	1.44189	2.37012	5.67139			101.54	7.04492	7.34668	7.70898	8.375	9.80859			37.64	0.366211	0.319824	1.14307	2.0127			106.54	1.59522	1.59668	3.91113	4.8086	11.7471
	115.44	0.477539	0.782715	1.44189	2.36035	5.65771			101.64	7.05078	7.34668	7.70508	8.39258	9.80859			37.74	0.37207	0.319824	1.13916	2.01855			106.64	1.59131	1.59277	3.91699	4.74658	11.7471
	115.54	0.485352	0.782715	1.45166	2.37012	5.66162			101.74	7.05078	7.35156	7.70117	8.4043	9.81836			37.84	0.381836	0.333496	1.13916	2.01855			106.74	1.60205	1.59863	3.92676	4.81006	11.7568
	115.64	0.481445	0.782715	1.44189	2.36035	5.65576			101.84	7.03223	7.33496	7.69531	8.41016	9.80273			37.94	0.375977	0.32959	1.14404	2.01855			106.84	1.61475	1.60254	3.93652	4.84912	11.7764
	115.74	0.477539	0.778809	1.44775	2.36621	5.66748			101.94	7.0332	7.33301	7.68945	8.39063	9.80469			38.04	0.391602	0.343262	1.15088	2.02246			106.94	1.62061	1.60645	3.94043	4.86572	11.7646
	115.84	0.46582	0.76709	1.44971	2.35449	5.65967			102.04	7.05273	7.35449	7.69824	8.39453	9.82227			38.14	0.385742	0.349121	1.15088	2.02832			107.04	1.62451	1.61231	3.95606	4.88623	11.7647
	115.94	0.481445	0.778809	1.46729	2.35645	5.67725			102.14	7.05664	7.35254	7.69531	8.41016	9.8125			38.24	0.391602	0.343262	1.14502	2.03223			107.24	1.63233	1.60254	3.95606	4.87842	11.7705
	116.04	0.481445	0.776855	1.45166	2.35449	5.67139			102.24	7.04297	7.35449	7.68945	8.40625	9.80664			38.34	0.401367	0.358887	1.16064	2.03809			107.34	1.63623	1.60645	3.96973	4.86963	11.7764
	116.14	0.487305	0.776855	1.45752	2.35645	5.67139			102.34	7.05859	7.36816	7.70117	8.4043	9.82324			38.44	0.389648	0.36377	1.15479	2.03809			107.44	1.63623	1.62207	3.98145	4.86768	11.7822
	116.24	0.485352	0.784668	1.45557	2.35059	5.68115			102.44	7.06055	7.35645	7.70117	8.42188	9.83789			38.54	0.389648	0.36084	1.15088	2.02832			107.54	1.64405	1.61621	3.9834	4.85791	11.7803
	116.34	0.481445	0.780762	1.46143	2.35059	5.67139			102.54	7.06445	7.34863	7.71094	8.41406	9.83789			38.64	0.379883	0.36084	1.15088	2.03223			107.74	1.646	1.6377	4.01172	4.88428	11.8057
	116.44	0.491211	0.790527	1.46143	2.35059	5.68506			102.64	7.07422	7.34863	7.71484	8.41211	9.83008			38.74	0.379883	0.35498	1.14307	2.03809			107.94	1.65576	1.65137	4.03809	4.89209	11.8193
	116.54	0.487305	0.790527	1.46729	2.35645	5.68506			102.74	7.07031	7.34863	7.70898	8.41602	9.81836			38.84	0.391602	0.372559	1.16455	2.04004			108.04	1.66162	1.65625	4.04004	4.89209	11.8213
	116.64	0.481445	0.780762	1.45557	2.34473	5.68311			102.84	7.08594	7.36035	7.7207	8.41016	9.83008			38.94	0.385742	0.362793	1.16064	2.04395			108.14	1.66162	1.66504	4.05762	4.90576	11.8271
	116.74	0.47168	0.780762	1.46143	2.35059	5.68896			102.94	7.0918	7.37012	7.71875	8.42285	9.83984			39.04	0.387695	0.362793	1.16064	2.03613			108.24	1.66162	1.66504	4.05371	4.90381	11.8369
	116.84	0.478516	0.782715	1.46338	2.3623	5.69092			103.04	7.0918	7.36621	7.71875	8.43359	9.83594			39.14	0.385742	0.362793	1.16064	2.04395			108.44	1.66943	1.68066	4.06348	4.92334	11.8447
	116.94	0.481445	0.778809	1.44775	2.34668	5.68701			103.14	7.09473	7.36523	7.72559	8.42578	9.85449			39.24	0.381836	0.366699	1.15479	2.04395			108.64	1.66748	1.69434	4.07324	4.93701	11.8564
	117.04	0.489258	0.772949	1.45557	2.35449	5.69092			103.24	7.08398	7.36426	7.72461	8.43457	9.85742			39.34	0.391602	0.372559	1.17432	2.05957			108.74	1.66553	1.69629	4.07324	4.95069	11.8701
	117.14	0.483398	0.757324	1.45166	2.35059	5.68604			103.34	7.10156	7.36816	7.72852	8.42383	9.85742			39.44	0.385742	0.376465	1.17041	2.0498			108.84	1.67334	1.7041	4.08887	4.95947	11.874
	117.24	0.489258	0.769043	1.45166	2.36035	5.69873			103.44	7.09375	7.36816	7.72852	8.42969	9.84961			39.54	0.391602	0.370605	1.17041	2.03809			108.94	1.67334	1.69434	4.08105	4.96045	11.8721
	117.34	0.487305	0.751465	1.45166	2.36035	5.68311			103.54	7.09961	7.37793	7.72656	8.42969	9.84766			39.64	0.391602	0.374512	1.17529	2.04199			109.04	1.68115	1.71192	4.10059	4.96436	11.8916
	117.44	0.493164	0.765137	1.46631	2.36426	5.69287			103.64	7.11523	7.38574	7.73828	8.43359	9.86719			39.74	0.385742	0.380371	1.17236	2.04785			109.14	1.69287	1.71387	4.11035	4.97412	11.9014
	117.54	0.483398	0.770996	1.46338	2.37012	5.68311			103.74	7.11719	7.38574	7.73438	8.45117	9.85938			39.84	0.387695	0.376465	1.17236	2.03418			109.44	1.70459	1.72168	4.12988	4.99756	11.915
	117.64	0.487305	0.770996	1.46338	2.36035	5.68311			103.84	7.12109	7.38965	7.74219	8.44336	9.86523			39.94	0.391602	0.370605	1.17236	2.02832			110.54	1.68506	1.71191	4.18066	4.99756	11.9111
	117.74	0.483398	0.770996	1.45361	2.35059	5.67334			103.94	7.10938	7.3877	7.73633	8.44922	9.8457			40.04	0.379883	0.364746	1.16064	2.02344			110.64	1.68408	1.7002	4.16113	4.98975	11.8955
	117.84	0.49707	0.775879	1.46338	2.36035	5.68311			104.04	7.10938	7.3877	7.72852	8.4375	9.84961			40.14	0.385742	0.376465	1.17041	2.02637			110.74	1.70459	1.71777	4.17285	5.00928	11.9131
	117.94	0.50293	0.802246	1.47314	2.36035	5.67725			104.14	7.11035	7.37598	7.72461	8.42969	9.8457			40.24	0.379883	0.364746	1.16064	2.02441			110.84	1.70068	1.71777	4.17383	5.00732	11.9131
	118.04	0.498047	0.797363	1.4585	2.3457	5.68213			104.24	7.11133	7.37598	7.72852	8.42969	9.8457			40.34	0.384766	0.370605	1.16455	2.02051			110.94	1.71826	1.72949	4.16309	5.01904	11.9268
	118.14	0.491211	0.804199	1.46143	2.34863	5.69092			104.34	7.11523	7.36426	7.72461	8.42969	9.8457			40.44	0.391602	0.380371	1.17041	2.02051			111.04	1.70654	1.71387	4.16016	5.00928	11.9268
	118.24	0.495117	0.800293	1.46143	2.33887	5.69482			104.44	7.125	7.38086	7.7207	8.41797	9.83789			40.54	0.391602	0.380371	1.17432	2.0127			111.14	1.70264	1.70801	4.15723	5.00342	11.9209
	118.34	0.496094	0.818848	1.49561	2.35352	5.71924			104.54	7.13086	7.37598	7.72656	8.42578	9.83398			40.64	0.385742	0.370605	1.17041	2.01855			111.24	1.7124	1.72363	4.1748	5.02295	11.9365
	118.44	0.512695	0.831543	1.50635	2.3584	5.75146			104.64	7.13086	7.37988	7.72656	8.42773	9.83789			40.74	0.391602	0.374512	1.16064	2.0127			111.34	1.70264	1.70801	4.16895	5.03467	11.9326
	118.54	0.538086	0.856934	1.53369	2.37012	5.76709			104.74	7.12305	7.37988	7.72266	8.41992	9.83789			40.84	0.387695	0.376465	1.16064	2.01465			111.44	1.69678	1.69824	4.16113	5.01709	11.917
	118.64	0.541992	0.862793	1.54736	2.37988	5.77295			104.84	7.12891	7.37793	7.73145	8.41992	9.83594			40.94	0.397461	0.387207	1.1626	2.02051			111.54	1.69287	1.69434	4.16504	5.01904	11.9189
	118.74	0.535156	0.834473	1.51123	2.35742	5.74268			104.94	7.13672	7.37793	7.73047	8.42969	9.82813			41.04	0.393555	0.394043	1.1626	2.01465			111.64	1.69287	1.69824	4.15527	5.02295	11.917
	118.84	0.52832	0.821777	1.48486	2.34473	5.73975			105.04	7.13867	7.37793	7.72656	8.42969	9.82813			41.14	0.393555	0.394043	1.1665	2.03027			111.74	1.69287	1.7002	4.15527	5.03467	11.9268
	118.94	0.508789	0.802246	1.48096	2.3291	5.73389			105.14	7.14648	7.37012	7.73438	8.41797	9.82617			41.24	0.393555	0.382324	1.1626	2.0166			111.84	1.68799	1.68945	4.14648	5.02881	11.9219
	119.04	0.540039	0.790527	1.48486	2.33887	5.75537			105.24	7.14063	7.37012	7.73633	8.42188	9.83008			41.34	0.393555	0.39209	1.17236	2.02441			111.94	1.68994	1.6875	4.12207	5.02393	11.9238
	119.14	0.56543	0.813965	1.51025	2.3584	5.7876			105.34	7.14063	7.37598	7.72852	8.42773	9.83594			41.44	0.407227	0.395996	1.17041	2.04004			112.04	1.70752	1.71289	4.0918	5.03369	11.9414
	119.24	0.549805	0.804199	1.51025	2.35254	5.78076			105.44	7.14063	7.37598	7.72852	8.41992	9.82422			41.54	0.40332	0.401855	1.17529	2.04395			112.14	1.69873	1.69824	4.08691	5.02881	11.9326
	119.34	0.416992	0.671387	1.39893	2.24512	5.63232			105.54	7.13867	7.36035	7.72656	8.4209	9.80957			41.64	0.40332	0.395996	1.18604	2.04004			112.24	1.70654	1.69727	4.07324	5.02881	11.9307
	119.44	0.521484	0.790527	1.4751	2.3584	5.75928			105.64	7.13477	7.36621	7.72656	8.41992	9.81641			41.74	0.413086	0.407715	1.18799	2.0459			112.34	1.70654	1.7002	4.05762	5.0249	11.9326
	119.54	0.594727	0.812988	1.42236	2.37793	5.78076			105.74	7.14844	7.36621	7.71875	8.41602	9.81641			41.84	0.40332	0.401855	1.17627	2.03418			112.44	1.70068	1.69043	4.05176	5.01904	11.9209
	119.64	0.737305	0.92627	1.48096	2.50195	5.89404			105.84	7.14844	7.36621	7.72852	8.41797	9.82031			41.94	0.40332	0.395996	1.18213	2.04004			112.54	1.71045	1.67871	4.03613	5.00928	11.915
	119.74	0.512207	0.727051	1.0498	2.34668	5.74414			105.94	7.14063	7.3623	7.73242	8.42188	9.81836			42.04	0.40918	0.397949	1.18213	2.03613			112.64	1.70654	1.68066	4.03223	4.99756	11.916
	119.84	0.787598	0.745605	1.57178	2.51953	5.88428			106.04	7.14063	7.35645	7.73438	8.41992	9.81445			42.14	0.395508	0.395996	1.18213	2.03516			112.74	1.70068	1.68457	4.02637	5.00732	11.9268
	120.94	1.07471	1.42334	1.27393	1.23047	5.0293			106.14	7.14551	7.35645	7.73828	8.41992	9.82227			42.24	0.401367	0.405762	1.18604	2.04004			112.84	1.70654	1.66895	4.02246	5.00342	11.9131
	121.04	0.996582	1.09521	1.30127	1.22998	4.61377			106.24	7.14063	7.36035	7.72656	8.41992	9.81641			42.34	0.381836	0.395996	1.17236	2.02051			112.94	1.71045	1.65332	4.02051	4.9917	11.9072
	121.14	0.745117	1.25439	1.23193	1.04199	4.38232			106.34	7.14453	7.36621	7.73047	8.42383	9.81641			42.44	0.395508	0.411621	1.17236	2.02441			113.04	1.71729	1.66895	4.03809	5.00928	11.9229
	121.24	0.75	1.28613	1.10107	1.22852	4.41309			106.44	7.16211	7.37793	7.74805	8.42188	9.83203			42.54	0.401367	0.401855	1.17236	2.03418			113.14	1.72998	1.6709	4.03223	4.99561	11.9248
	121.34	0.68457	1.4502	1.21338	1.31934	4.45459			106.54	7.15039	7.36621	7.73633	8.42969	9.82617			42.64	0.391602	0.406738	1.17627	2.03027			113.24	1.72412	1.66895	4.02051	4.99365	11.9229
	121.44	0.660645	1.229	1.03809	1.02734	3.95752			106.64	7.1582	7.38574	7.75586	8.41406	9.83008			42.74	0.386719	0.408691	1.18115	2.03516			113.34	1.72021	1.65918	4.02637	4.98779	11.9229
	121.54	0.819336	1.01709	1.39307	1.10986	4.10156			106.74	7.17383	7.39746	7.76758	8.43164	9.83594			42.84	0.394531	0.403809	1.17822	2.04199			113.44	1.7124	1.66309	4.02637	4.98779	11.917
	121.64	0.952637	1.34131	1.39063	1.18311	4.01367			106.84	7.16992	7.38574	7.76758	8.44141	9.83594			42.94	0.405273	0.409668	1.18213	2.05176			113.54	1.71631	1.67285	4.03613	4.99756	11.9307
	121.74	0.875	1.5083	1.30518	1.25244	4.02881			106.94	7.17383	7.38574	7.77734	8.44141	9.83594			43.04	0.401367	0.403809	1.18799	2.04785			113.64	1.7124	1.65723	4.03125	4.9917	11.9268
	121.84	0.858398	1.41016	1.21338	1.23438	3.84814			107.04	7.17188	7.38574	7.75781	8.45117	9.83594			43.14	0.407227	0.411621	1.19385	2.05957			113.74	1.72412	1.67481	4.04004	5.00928	11.9482
	121.94	0.830566	1.41406	1.0791	1.19287	3.61816			107.14	7.16797	7.37793	7.75391	8.44336	9.82813			43.24	0.40918	0.411621	1.18604	2.0459			113.84	1.72412	1.67871	4.0498	4.99951	11.9521
	122.04	0.749023	1.35303	1.0083	1.1626	3.48389			107.24	7.16406	7.37598	7.75781	8.4375	9.83789			43.34	0.407227	0.411621	1.18994	2.04004			113.94	1.71924	1.67578	4.04297	4.99951	11.9434
	122.14	0.710449	1.26123	0.979004	1.12744	3.4292			107.34	7.16602	7.38379	7.75	8.4375	9.83008			43.44	0.411133	0.415527	1.19482	2.05371			114.04	1.70069	1.66309	4.04004	4.98779	11.9463
	122.24	0.662598	1.2876	0.981934	1.16016	3.44287			107.44	7.14844	7.37598	7.74902	8.43359	9.82813			43.54	0.411133	0.411621	1.1958	2.0498			114.14	1.70068	1.66699	4.0459	4.9917	11.9502
	122.34	0.685547	1.271	0.965332	1.18945	3.46436			107.54	7.15625	7.37598	7.74805	8.43164	9.82617			43.64	0.405273	0.425293	1.21143	2.06348			114.24	1.71045	1.66699	4.06543	5.00342	11.9717
	122.44	0.71875	1.27832	0.964355	1.18457	3.46729			107.64	7.1582	7.37598	7.74805	8.44141	9.83008			43.74	0.407227	0.41748	1.19775	2.05566			114.34	1.7124	1.66699	4.05762	4.99951	11.9658
	122.54	0.770508	1.42725	0.978027	1.25781	3.52881			107.74	7.16992	7.38086	7.75586	8.4375	9.85547			43.84	0.401367	0.415527	1.20557	2.06348			114.44	1.70264	1.66895	4.05762	4.98975	11.9658
	122.64	0.806152	1.5	0.975586	1.28027	3.51123			107.84	7.17383	7.3877	7.76367	8.4375	9.85938			43.94	0.395508	0.421387	1.20166	2.05762			114.54	1.69287	1.65332	4.05176	4.97998	11.9561
	122.74	0.833008	1.43066	1.00977	1.24512	3.4585			107.94	7.17969	7.40332	7.77734	8.4375	9.86523			44.04	0.401367	0.409668	1.20557	2.05762			114.64	1.70264	1.66699	4.06738	4.9917	11.9658
	122.84	0.919434	1.46436	1.08447	1.26465	3.50781			108.04	7.18359	7.39355	7.76563	8.44922	9.86523			44.14	0.391602	0.409668	1.19775	2.04883			114.74	1.69092	1.66895	4.06152	4.99365	11.9658
	122.94	0.925293	1.45313	1.09277	1.25146	3.5293			108.14	7.19727	7.40527	7.77344	8.44531	9.87305			44.24	0.405273	0.409668	1.20166	2.0498			114.84	1.67725	1.66309	4.05957	4.98779	11.9561
	123.04	0.969727	1.47998	1.11377	1.2627	3.55811			108.24	7.18359	7.3877	7.76758	8.46191	9.87988			44.34	0.401367	0.414551	1.20557	2.0498			114.94	1.66748	1.64746	4.06152	4.98779	11.9619
	123.14	0.973633	1.47021	1.14355	1.25293	3.51318			108.34	7.18945	7.3877	7.76758	8.45898	9.88672			44.44	0.405273	0.431152	1.20947	2.05957			115.04	1.67529	1.64648	4.05566	4.98779	11.9492
	123.24	0.926758	1.43945	1.14111	1.23975	3.4624			108.44	7.20117	7.39941	7.7832	8.46289	9.89844			44.54	0.411133	0.421387	1.20947	2.05957			115.14	1.68115	1.64941	4.05176	4.97412	11.9619
	123.34	0.94043	1.44873	1.1665	1.22461	3.44678			108.54	7.20605	7.41113	7.80859	8.4707	9.90234			44.64	0.425781	0.421387	1.21924	2.06348			115.24	1.69678	1.64551	4.05176	4.98389	11.9717
	123.44	0.936523	1.43506	1.12549	1.19629	3.43115			108.64	7.20117	7.39746	7.79688	8.48242	9.9082			44.74	0.420898	0.415527	1.20947	2.05957			115.34	1.69287	1.64551	4.06738	4.99951	11.9775
	123.54	0.944336	1.43896	1.11377	1.1748	3.43115			108.74	7.20508	7.41699	7.80078	8.4707	9.91602			44.84	0.420898	0.421387	1.20361	2.05957			115.44	1.68701	1.64941	4.05566	4.99951	11.9814
	123.64	0.97168	1.47656	1.14697	1.18848	3.4292			108.84	7.20703	7.40918	7.80664	8.48242	9.9082			44.94	0.415039	0.411621	1.20947	2.05957			115.54	1.67725	1.64941	4.05566	4.99365	11.9834
	123.74	0.953125	1.4917	1.15771	1.20703	3.44092			108.94	7.19336	7.40527	7.79688	8.48828	9.9082			45.04	0.432617	0.41748	1.2251	2.06152			115.64	1.65186	1.64355	4.05566	4.98193	11.9873
	123.84	0.935547	1.47217	1.1333	1.20703	3.41553			109.04	7.20313	7.40918	7.79688	8.49023	9.91211			45.14	0.422852	0.41748	1.22119	2.06543			115.74	1.59033	1.63965	4.05176	4.98389	11.9873
	123.94	0.915039	1.47607	1.1333	1.22949	3.40186			109.14	7.19922	7.40527	7.79688	8.49023	9.91406			45.24	0.426758	0.433105	1.23096	2.08105			116.44	1.61279	1.6416	4.05566	4.9917	12.0146
	124.04	0.897461	1.48682	1.14111	1.23047	3.39209			109.24	7.20703	7.40918	7.79688	8.49414	9.92188			45.34	0.436523	0.425293	1.2251	2.08105			116.54	1.60107	1.6377	4.05566	4.99365	12.0146
	124.14	0.905273	1.47314	1.14307	1.22656	3.36084			109.34	7.20898	7.4209	7.80078	8.5	9.94727			45.44	0.438477	0.437012	1.23682	2.09082			116.64	1.59912	1.62793	4.05762	4.98975	12.0166
	124.24	0.921875	1.45557	1.13525	1.19922	3.38135			109.44	7.21289	7.42676	7.81055	8.5	9.94727			45.54	0.426758	0.425293	1.22119	2.08105			116.74	1.5835	1.62988	4.05762	4.98584	12.0166
	124.34	0.90625	1.46338	1.14307	1.22461	3.36963			109.54	7.22461	7.42676	7.80664	8.5	9.95898			45.64	0.442383	0.435059	1.23584	2.09473			116.84	1.57764	1.61816	4.05762	4.98389	12.0264
	124.44	0.90625	1.43799	1.14697	1.2207	3.34326			109.64	7.24219	7.44238	7.81836	8.51563	9.9668			45.74	0.436523	0.440918	1.24268	2.10059			116.94	1.57568	1.62012	4.05762	4.98389	12.0273
	124.54	0.921875	1.43604	1.17236	1.23047	3.34131			109.74	7.23438	7.44043	7.81445	8.5332	9.9668			45.84	0.442383	0.444824	1.24658	2.10059			117.04	1.57569	1.61621	4.05567	4.97217	12.0322
	124.64	0.920898	1.45166	1.19189	1.23535	3.34717			109.84	7.24414	7.4541	7.82617	8.53516	9.97461			45.94	0.436523	0.450684	1.25244	2.10059			117.14	1.58936	1.62207	4.05957	4.97803	12.0361
	124.74	0.929688	1.44678	1.18018	1.23047	3.33936			109.94	7.25391	7.4502	7.81836	8.54883	9.97461			46.04	0.446289	0.444824	1.24268	2.09277			117.24	1.60498	1.62207	4.06543	4.97803	12.0264
	124.84	0.964844	1.46338	1.19971	1.26367	3.36572			110.04	7.26367	7.45996	7.81836	8.54102	9.97852			46.14	0.44043	0.455566	1.25244	2.1084			117.34	1.60205	1.61816	4.06543	4.98779	12.0361
	124.94	0.998047	1.50244	1.22705	1.29004	3.37158			110.14	7.27539	7.46777	7.83398	8.54102	9.98633			46.24	0.455078	0.462402	1.25635	2.1084			117.44	1.60498	1.61621	4.06543	4.98193	12.0361
	125.04	0.983398	1.48779	1.20752	1.28906	3.36084			110.24	7.27734	7.46387	7.83594	8.56055	9.99023			46.34	0.458008	0.452637	1.2583	2.1084			117.54	1.61279	1.61426	4.06738	4.98975	12.042
	125.14	0.987305	1.47021	1.20557	1.28418	3.36475			110.34	7.28125	7.47168	7.83594	8.55273	9.99609			46.44	0.459961	0.456543	1.27002	2.1123			117.64	1.60303	1.61035	4.06738	4.98975	12.0576
	125.24	0.984375	1.48486	1.21924	1.30273	3.37451			110.44	7.26563	7.46191	7.83203	8.55859	10			46.54	0.458008	0.458496	1.27783	2.11426			117.74	1.61084	1.60645	4.05567	4.99951	12.0576
	125.34	0.976563	1.47705	1.22705	1.29492	3.37256			110.54	7.27637	7.46777	7.83789	8.55469	10.0098			46.64	0.456055	0.444824	1.27197	2.10254			117.84	1.62646	1.6123	4.05566	5.00146	12.0576
	125.44	0.958008	1.46826	1.22705	1.28613	3.35693			110.64	7.28711	7.47168	7.8457	8.55273	10.0137			46.74	0.463867	0.466309	1.27588	2.12012			117.94	1.65576	1.62207	4.07031	5.01318	12.0713
	125.54	0.941406	1.45361	1.21143	1.2793	3.34033			110.74	7.28906	7.46582	7.85352	8.56445	10.0254			46.84	0.458008	0.462402	1.28174	2.11035			118.04	1.66455	1.62695	4.07715	5.01123	12.0654
	125.64	0.93457	1.46338	1.21533	1.28223	3.33936			110.84	7.27148	7.46094	7.83594	8.57031	10.0156			46.94	0.454102	0.452637	1.28564	2.11426			118.14	1.68115	1.62012	4.07715	5.01709	12.0615
	125.74	0.947266	1.46436	1.21729	1.2793	3.34033			110.94	7.27539	7.46777	7.83984	8.57031	10.0234			47.04	0.448242	0.446777	1.28174	2.11035			118.24	1.68506	1.62597	4.08496	5.01513	12.0635
	125.84	0.936523	1.46045	1.20361	1.27051	3.32764			111.04	7.26953	7.47168	7.84082	8.57031	10.0176			47.14	0.463867	0.452637	1.2915	2.11035			118.34	1.65967	1.6084	4.05566	5.00537	12.0479
	125.94	0.950195	1.47412	1.20947	1.27051	3.32178			111.14	7.27734	7.46973	7.84766	8.5625	10.0273			47.24	0.452148	0.446777	1.29541	2.11035			118.44	1.67236	1.60156	4.04492	4.99951	12.0625
	126.04	0.973633	1.48291	1.23389	1.27832	3.3335			111.24	7.29102	7.47754	7.86328	8.56836	10.0352			47.34	0.46582	0.466309	1.30127	2.11035			118.54	1.67237	1.61231	4.03614	4.99952	12.0557
	126.14	0.96582	1.47119	1.22217	1.25977	3.31104			111.34	7.28711	7.48535	7.86914	8.58008	10.0391			47.44	0.47168	0.472168	1.31104	2.125			118.64	1.68408	1.63379	4.0459	4.98193	12.0693
	126.24	0.977539	1.47217	1.21729	1.2666	3.32178			111.44	7.28906	7.47559	7.85742	8.58008	10.0469			47.54	0.47168	0.48584	1.31494	2.12988			119.04	1.66943	1.63379	4.07715	5.0249	12.0928
	126.34	0.987305	1.47607	1.21143	1.26074	3.32568			111.54	7.28906	7.47559	7.86523	8.58789	10.043			47.64	0.461914	0.478027	1.31689	2.12598			119.14	1.61865	1.61621	4.07715	5.021	12.0762
	126.44	0.989258	1.48193	1.22314	1.26074	3.32861			111.64	7.2832	7.45801	7.85156	8.58789	10.042			47.74	0.475586	0.474121	1.32471	2.12793			119.24	1.59913	1.59864	4.042	5.00342	12.0713
	126.54	0.993164	1.4917	1.22119	1.25977	3.3374			111.74	7.28125	7.46191	7.85742	8.57813	10.0488			47.84	0.485352	0.494629	1.33545	2.14355			119.34	1.5542	1.6123	4.07129	5.01123	12.0947
	126.64	0.976563	1.48291	1.21143	1.25879	3.34326			111.84	7.26563	7.45215	7.85742	8.58691	10.0449			47.94	0.500977	0.515137	1.34229	2.15918			119.44	1.47021	1.58105	4.02051	4.99561	12.0713
	126.74	0.987305	1.48389	1.21143	1.27051	3.34326			111.94	7.2832	7.46582	7.87305	8.58594	10.0547			48.04	0.492188	0.507324	1.33838	2.14551			119.54	1.41557	1.56938	4.00883	4.98002	12.087
	126.84	0.984375	1.46533	1.20361	1.26953	3.32666			112.04	7.26367	7.43652	7.85938	8.5957	10.0371			48.14	0.483398	0.495605	1.33252	2.14355			121.84	1.58789	1.32715	1.88477	2.53955	4.97607
	126.94	0.979492	1.47021	1.20947	1.26855	3.31982			112.14	7.28125	7.45215	7.87109	8.58203	10.0488			48.24	0.483398	0.501465	1.33643	2.14941			121.94	1.48828	1.20557	1.86426	2.60596	4.65381
	127.04	0.989258	1.47021	1.20947	1.27344	3.31982			112.24	7.27734	7.45801	7.88086	8.58984	10.0488			48.34	0.487305	0.501465	1.34229	2.13965			122.04	1.43588	1.17123	1.9349	2.7059	4.60287
	127.14	0.990234	1.47021	1.20947	1.29004	3.31592			112.34	7.2793	7.45801	7.87695	8.59766	10.0488			48.44	0.481445	0.491699	1.33838	2.12598			122.14	1.44434	1.28955	1.93359	2.82422	4.72559
	127.24	0.991211	1.47021	1.20947	1.29004	3.31006			112.44	7.28809	7.46973	7.86914	8.59961	10.0488			48.54	0.493164	0.497559	1.33838	2.13574			122.24	1.43738	1.21277	1.78064	2.71619	4.75085
	127.34	0.991211	1.47119	1.21338	1.29004	3.30615			112.54	7.2832	7.46191	7.86133	8.5918	10.041			48.64	0.491211	0.497559	1.34814	2.14551			122.34	1.50537	1.23486	1.86572	2.67529	4.74072
	127.44	1.00293	1.48584	1.22021	1.29004	3.30127			112.64	7.27539	7.46777	7.86719	8.58789	10.0527			48.74	0.508789	0.499512	1.35986	2.14746			122.44	1.48389	1.31787	1.95654	2.64209	4.72852
	127.54	0.993164	1.48193	1.20752	1.27051	3.29248			112.74	7.27734	7.46387	7.86328	8.58984	10.0547			48.84	0.493164	0.48584	1.34229	2.14551			122.84	1.48389	1.42188	1.97754	2.64795	4.52344
	127.64	0.992188	1.47119	1.19092	1.26953	3.2915			112.84	7.27539	7.45801	7.84961	8.58594	10.0449			48.94	0.487305	0.491699	1.34229	2.1416			122.94	1.39697	1.43359	1.91602	2.60693	4.50195
	127.74	0.961914	1.45654	1.17627	1.26953	3.27686			112.94	7.29297	7.47363	7.87109	8.58008	10.0605			49.04	0.506836	0.495605	1.35596	2.15527			123.04	1.32562	1.39545	1.86713	2.57269	4.47064
	127.84	0.958008	1.45459	1.17432	1.27441	3.271			113.04	7.29688	7.47559	7.86719	8.5918	10.0684			49.14	0.50293	0.501465	1.36182	2.14941			123.14	1.31006	1.40234	1.85352	2.56104	4.45898
	127.94	0.956055	1.45068	1.17041	1.27051	3.26123			113.14	7.30273	7.47949	7.875	8.5918	10.0605			49.24	0.50293	0.505371	1.36572	2.15332			123.24	1.25875	1.44625	1.86031	2.54195	4.44966
	128.04	0.955078	1.45557	1.17041	1.28027	3.26514			113.24	7.29492	7.47949	7.87695	8.5918	10.0684			49.34	0.506836	0.501465	1.37158	2.15918			123.34	1.25146	1.4624	1.8999	2.52686	4.43652
	128.14	0.948242	1.45654	1.17041	1.27051	3.25732			113.34	7.30078	7.47754	7.86914	8.5918	10.0645			49.44	0.512695	0.497559	1.36768	2.16016			123.44	1.26709	1.49072	1.94238	2.53857	4.45752
	128.24	0.954102	1.4585	1.17041	1.28027	3.25146			113.44	7.3125	7.48926	7.87695	8.5918	10.0742			49.54	0.512695	0.496582	1.37158	2.1709			123.94	1.22021	1.38965	1.96777	2.45752	4.38965
	128.34	0.948242	1.44678	1.16943	1.27441	3.25146			113.54	7.30469	7.47754	7.87305	8.60742	10.0684			49.64	0.516602	0.493652	1.36572	2.16504			124.04	1.20846	1.33005	1.90622	2.42917	4.36618
	128.44	0.944336	1.45264	1.15869	1.2666	3.2417			113.64	7.31055	7.47852	7.86719	8.59766	10.0645			49.74	0.522461	0.497559	1.38135	2.1709			124.14	1.24854	1.32227	1.91406	2.40381	4.34863
	128.54	0.944336	1.44287	1.1626	1.26074	3.24756			113.74	7.31055	7.48926	7.86719	8.5918	10.0586			49.84	0.522461	0.503418	1.37549	2.1748			124.24	1.2822	1.36618	1.94626	2.43699	4.35251
	128.64	0.933594	1.43799	1.14795	1.25977	3.23193			113.84	7.30176	7.47656	7.8623	8.60156	10.0537			49.94	0.525391	0.51709	1.38135	2.18066			124.34	1.22217	1.37793	1.9541	2.44873	4.3584
	128.74	0.93457	1.42334	1.1333	1.24707	3.22412			113.94	7.30078	7.46582	7.86035	8.59668	10.0469			50.04	0.517578	0.508301	1.37646	2.16992			124.44	1.19873	1.38184	1.95166	2.44678	4.35449
	128.84	0.936523	1.4292	1.13916	1.25684	3.22607			114.04	7.30469	7.46973	7.86719	8.58984	10.0469			50.14	0.516602	0.51709	1.37549	2.18457			124.54	1.22019	1.39597	1.97214	2.46091	4.37644
	128.94	0.924805	1.42334	1.14111	1.24707	3.21436			114.14	7.29883	7.48145	7.87109	8.59375	10.0469			50.24	0.512695	0.515137	1.38135	2.18066			124.64	1.21045	1.3916	1.97949	2.45068	4.37549
	129.04	0.930664	1.42432	1.13525	1.24219	3.22412			114.24	7.29883	7.4873	7.87695	8.60742	10.0469			50.34	0.526367	0.530762	1.38525	2.18262			124.74	1.21824	1.42674	1.99119	2.44822	4.38963
	129.14	0.93457	1.44092	1.14502	1.25879	3.22998			114.34	7.29102	7.47559	7.87695	8.61133	10.0508			50.44	0.522461	0.520996	1.37939	2.17871			124.84	1.22998	1.44434	1.9873	2.45508	4.40771
	129.24	0.932617	1.43115	1.14111	1.24902	3.22021			114.44	7.30859	7.4873	7.88867	8.60742	10.0645			50.54	0.536133	0.534668	1.37939	2.18262			125.14	1.23193	1.43066	1.9834	2.45313	4.44873
	129.34	0.911133	1.42139	1.14111	1.24316	3.22021			114.54	7.30859	7.49707	7.89844	8.62695	10.0645			50.64	0.522461	0.530762	1.38037	2.18457			125.24	1.22801	1.42479	1.97703	2.44627	4.47117
	129.44	0.911133	1.41162	1.12158	1.24902	3.21045			114.64	7.31738	7.50879	7.89844	8.63086	10.0508			50.74	0.532227	0.530762	1.38135	2.17871			125.34	1.21436	1.41895	1.97607	2.44092	4.46973
	129.54	0.911133	1.42139	1.13135	1.24902	3.21436			114.74	7.32031	7.50098	7.88672	8.64063	10.0566			50.84	0.532227	0.530762	1.39111	2.17871			125.44	1.19678	1.43652	1.97559	2.40967	4.45215
	129.64	0.907227	1.41162	1.12158	1.23926	3.20654			114.84	7.32031	7.50684	7.88672	8.62891	10.0566			50.94	0.532227	0.524902	1.38135	2.16895			125.54	1.1826	1.42869	1.97117	2.4077	4.43797
	129.74	0.902344	1.41162	1.11768	1.23926	3.21045			114.94	7.33594	7.52246	7.90234	8.64063	10.0684			51.04	0.530273	0.526855	1.38135	2.16992			125.64	1.16748	1.41895	1.96582	2.38916	4.4292
	129.84	0.893555	1.41553	1.1167	1.24121	3.20068			115.04	7.33398	7.52441	7.9043	8.64844	10.0762			51.14	0.524414	0.51123	1.37158	2.1709			125.74	1.16161	1.41307	1.96581	2.39061	4.44042
	129.94	0.897461	1.41162	1.12354	1.24512	3.21631			115.14	7.33594	7.52832	7.9043	8.64844	10.0684			51.24	0.540039	0.51416	1.38135	2.1748			125.84	1.16162	1.4043	1.96191	2.39307	4.44629
	130.04	0.899414	1.41162	1.11377	1.24707	3.2085			115.24	7.3418	7.53613	7.91016	8.64844	10.0684			51.34	0.53125	0.51709	1.37158	2.16895			125.94	1.14795	1.3877	1.94629	2.37451	4.44043
	130.14	0.885742	1.40381	1.11572	1.2334	3.20068			115.34	7.33398	7.5166	7.9082	8.66797	10.0566			51.44	0.541992	0.515137	1.37158	2.17871			126.04	1.14598	1.38426	1.94627	2.37694	4.45409
	130.24	0.891602	1.3999	1.11182	1.22949	3.1958			115.44	7.34375	7.52441	7.91211	8.64844	10.0527			51.54	0.532227	0.51123	1.37549	2.17285			126.14	1.14014	1.40723	1.93066	2.37354	4.44043
	130.34	0.885742	1.40674	1.10596	1.22949	3.20654			115.54	7.3418	7.52832	7.90234	8.66406	10.0586			51.64	0.540039	0.513184	1.3833	2.18066			126.24	1.14012	1.41698	1.9287	2.36278	4.43651
	130.44	0.899414	1.40967	1.11768	1.22559	3.2085			115.64	7.33008	7.5127	7.89648	8.65039	10.0469			51.74	0.524414	0.51709	1.37158	2.1748			126.34	1.12744	1.41406	1.93359	2.34424	4.42773
	130.54	0.887695	1.39404	1.10596	1.22461	3.19678			115.74	7.3457	7.53027	7.91992	8.65039	10.0625			51.84	0.52832	0.536621	1.37158	2.19043			126.44	1.13428	1.42871	1.93066	2.33154	4.42871
	130.64	0.879883	1.38428	1.10791	1.21777	3.19873			115.84	7.33984	7.52051	7.90234	8.66211	10.0566			51.94	0.53418	0.532715	1.36572	2.18457			126.54	1.13329	1.43944	1.92382	2.31884	4.44042
	130.74	0.874023	1.38428	1.09229	1.21582	3.19287			115.94	7.33984	7.52637	7.91211	8.66016	10.0684			52.04	0.538086	0.536621	1.37549	2.19043			126.64	1.11865	1.4248	1.90332	2.30811	4.44727
	130.84	0.87793	1.37451	1.09619	1.21191	3.18311			116.04	7.34375	7.53027	7.91797	8.66797	10.0684			52.14	0.540039	0.538574	1.36768	2.18066			126.74	1.11864	1.42674	1.90917	2.32567	4.44823
	130.94	0.874023	1.37842	1.09619	1.21582	3.18701			116.14	7.33984	7.53223	7.91016	8.68359	10.0605			52.24	0.53418	0.536621	1.36182	2.18066			126.84	1.11084	1.40332	1.89941	2.31494	4.43555
	131.04	0.867188	1.37744	1.09521	1.20508	3.17627			116.24	7.34375	7.53906	7.91602	8.68555	10.0566			52.34	0.526367	0.54248	1.35693	2.18457			126.94	1.11084	1.39355	1.89355	2.29541	4.41406
	131.14	0.860352	1.37451	1.09229	1.20801	3.17334			116.34	7.3457	7.53809	7.91992	8.6875	10.0566			52.44	0.538086	0.54248	1.36377	2.18652			129.84	1.11182	1.42676	1.94043	2.31201	4.4209
	131.24	0.870117	1.37646	1.09619	1.2041	3.17529			116.44	7.35156	7.5459	7.92969	8.69141	10.0645			52.54	0.526367	0.530762	1.35205	2.17383			129.94	1.11279	1.43359	1.94629	2.31787	4.42676
	131.34	0.860352	1.36084	1.08057	1.2041	3.16357			116.54	7.36523	7.5459	7.93555	8.69141	10.0762			52.64	0.545898	0.54541	1.36572	2.19043			130.04	1.11572	1.43359	1.95996	2.32177	4.43554
	131.44	0.870117	1.37451	1.09521	1.21387	3.18311			116.64	7.36719	7.5459	7.92383	8.69727	10.0762			52.74	0.541992	0.54248	1.36572	2.18457			130.14	1.13135	1.43848	1.96777	2.3374	4.43164
	131.54	0.870117	1.37061	1.10205	1.20996	3.1792			116.74	7.39453	7.55762	7.94434	8.69727	10.0879			52.84	0.536133	0.536621	1.36572	2.18457			130.24	1.15185	1.45312	1.97363	2.34911	4.44823
	131.64	0.870117	1.37061	1.08838	1.2002	3.16553			116.84	7.39648	7.55371	7.94336	8.72559	10.084			52.94	0.555664	0.552246	1.37158	2.19043			130.34	1.13623	1.43457	1.95898	2.36377	4.43848
	131.74	0.860352	1.37061	1.08252	1.2002	3.16357			116.94	7.39063	7.54004	7.9375	8.72852	10.0781			53.04	0.546875	0.541504	1.36084	2.17969			130.44	1.15576	1.44727	1.95313	2.36768	4.44043
	131.84	0.858398	1.35693	1.06885	1.18652	3.15576			117.04	7.39551	7.54004	7.9375	8.74023	10.0781			53.14	0.535156	0.530762	1.354	2.17871			130.54	1.16161	1.458	1.95605	2.36279	4.45214
	131.94	0.857422	1.35303	1.06299	1.18066	3.14014			117.14	7.40234	7.53809	7.92969	8.73633	10.0781			53.24	0.541992	0.544434	1.35986	2.18262			130.64	1.16162	1.45313	1.93652	2.36963	4.44629
	132.04	0.852539	1.34521	1.05518	1.18262	3.14014			117.24	7.40625	7.5459	7.93359	8.73438	10.082			53.34	0.541992	0.536621	1.35986	2.18457			130.74	1.15771	1.46288	1.9453	2.37353	4.4453
	132.14	0.866211	1.36084	1.0708	1.19824	3.14502			117.34	7.39648	7.53809	7.94336	8.75977	10.0684			53.44	0.541992	0.530762	1.35986	2.18262			130.84	1.13818	1.4502	1.93555	2.36475	4.4375
	132.24	0.868164	1.34717	1.06689	1.18457	3.14795			117.44	7.40234	7.5498	7.94922	8.76367	10.0684			53.54	0.536133	0.534668	1.35303	2.17871			130.94	1.14209	1.4541	1.93457	2.36865	4.44824
	132.34	0.862305	1.34131	1.06494	1.17871	3.13232			117.54	7.39844	7.54395	7.95313	8.75977	10.084			53.64	0.541992	0.526855	1.3501	2.17871			131.04	1.14306	1.4541	1.92773	2.36865	4.44335
	132.44	0.852539	1.34131	1.0708	1.17285	3.12646			117.64	7.39258	7.53027	7.95117	8.76367	10.0781			53.74	0.530273	0.524902	1.34424	2.16699			131.14	1.14111	1.46191	1.91113	2.37256	4.44434
	132.54	0.848633	1.33154	1.06885	1.1748	3.12842			117.74	7.38086	7.52832	7.93164	8.76172	10.0781			53.84	0.532227	0.536621	1.35205	2.17285			131.24	1.13623	1.46191	1.91015	2.37255	4.43945
	132.64	0.856445	1.35107	1.07275	1.16895	3.12646			117.84	7.39258	7.52832	7.95703	8.76172	10.0781			53.94	0.532227	0.538574	1.34229	2.1748			131.34	1.14404	1.4541	1.91309	2.37842	4.45215
	132.74	0.852539	1.34131	1.07275	1.16895	3.13232			117.94	7.38867	7.52441	7.95703	8.76172	10.0898			54.04	0.532227	0.534668	1.34619	2.17383			131.44	1.12646	1.44531	1.90137	2.37549	4.43848
	132.84	0.856445	1.33154	1.07275	1.16406	3.12256			118.04	7.38477	7.53223	7.96094	8.76172	10.1074			54.14	0.532227	0.526855	1.34229	2.18066			131.54	1.12744	1.44531	1.90722	2.36962	4.44335
	132.94	0.864258	1.33154	1.07275	1.1709	3.12646			118.14	7.38672	7.51855	7.95508	8.75977	10.0957			54.24	0.532227	0.525879	1.34619	2.18066			131.64	1.11572	1.42871	1.90723	2.35693	4.42578
	133.04	0.864258	1.33154	1.07666	1.16113	3.12256			118.24	7.38086	7.52637	7.94141	8.75586	10.0879			54.34	0.522461	0.532715	1.34229	2.18066			131.74	1.10888	1.42871	1.90331	2.35302	4.42285
	133.14	0.860352	1.3374	1.08838	1.16895	3.12842			118.34	7.38086	7.53125	7.94727	8.74609	10.0879			54.44	0.522461	0.532715	1.34033	2.18066			131.84	1.10205	1.42188	1.89648	2.35889	4.41602
	133.24	0.852539	1.33154	1.0708	1.16113	3.12061			118.44	7.40039	7.55371	7.95508	8.74805	10.1074			54.54	0.522461	0.546387	1.354	2.18066			131.94	1.09717	1.40723	1.88184	2.34912	4.40527
	133.34	0.852539	1.33154	1.0708	1.15527	3.12061			118.54	7.39258	7.54395	7.95898	8.75586	10.084			54.64	0.532227	0.562012	1.35596	2.18066			132.04	1.0913	1.41015	1.87695	2.34521	4.41796
	133.44	0.84668	1.33643	1.07666	1.15137	3.12256			118.64	7.37695	7.53418	7.94727	8.76172	10.0938			54.74	0.522461	0.556152	1.34521	2.18066			132.14	1.07861	1.3916	1.87402	2.33545	4.40527
	133.54	0.852539	1.34326	1.07275	1.15527	3.11279			118.74	7.36328	7.53223	7.9668	8.75781	10.0801			54.84	0.536133	0.562012	1.35205	2.18457			132.24	1.08056	1.39648	1.86914	2.33056	4.41015
	133.64	0.852539	1.34326	1.08252	1.15137	3.1167			118.84	7.35449	7.50195	7.93066	8.76172	10.04			54.94	0.530273	0.556152	1.34619	2.19043			132.34	1.07764	1.40723	1.86816	2.34229	4.41113
	133.74	0.856445	1.34326	1.07275	1.1416	3.11279			118.94	7.35645	7.51172	7.9248	8.7373	10.0498			55.04	0.53125	0.562012	1.35205	2.18848			132.44	1.05811	1.3877	1.85645	2.32568	4.41113
	133.84	0.87207	1.35303	1.08252	1.15527	3.12256			119.04	7.35547	7.53027	7.92578	8.74512	10.0605			55.14	0.522461	0.565918	1.34619	2.18848			132.54	1.05615	1.38476	1.86132	2.32958	4.4121
	133.94	0.870117	1.34326	1.07861	1.15723	3.10889			119.14	7.38867	7.55566	7.94141	8.75195	10.0938			55.24	0.523438	0.566895	1.36279	2.18945			132.64	1.05322	1.37598	1.84473	2.31006	4.40527
	134.04	0.868164	1.34717	1.08057	1.15527	3.09717			119.24	7.42773	7.54004	7.92871	8.75391	10.1055			55.34	0.512695	0.554199	1.35205	2.18848			132.74	1.05908	1.38085	1.84765	2.30517	4.4082
	134.14	0.858398	1.3374	1.08643	1.15527	3.09131			119.34	7.43164	7.53809	7.95508	8.7373	10.0977			55.44	0.512695	0.560059	1.36572	2.18848			132.84	1.03662	1.3584	1.83105	2.29639	4.3916
	134.24	0.856445	1.3335	1.0708	1.15332	3.09131			119.44	7.40039	7.51855	7.94531	8.74609	10.0898			55.54	0.50293	0.556152	1.35986	2.17871			132.94	1.02686	1.35645	1.81934	2.29932	4.38965
	134.34	0.875977	1.3335	1.08447	1.1709	3.10107			119.54	7.38184	7.49121	7.89258	8.70117	10.0625			55.64	0.50293	0.555176	1.36963	2.19336			133.04	1.03271	1.34863	1.81445	2.29052	4.38671
	134.44	0.881836	1.3335	1.09229	1.16113	3.09717			119.64	7.40918	7.50586	7.88184	8.65332	10.0479			55.74	0.491211	0.552246	1.35986	2.18652			133.14	1.03271	1.35547	1.80957	2.29443	4.39941
	134.54	0.876953	1.32861	1.07764	1.15625	3.09033			119.74	7.31155	7.36037	7.66213	8.62109	9.7383			55.84	0.500977	0.565918	1.35986	2.18066			133.24	1.04247	1.35546	1.82226	2.29931	4.4082
	134.64	0.870117	1.32178	1.0708	1.15332	3.07959			119.84	7.33886	7.4414	7.79296	8.35059	9.75585			55.94	0.514648	0.571777	1.36475	2.18457			133.34	1.02686	1.35254	1.82129	2.29248	4.39551
	134.74	0.875	1.32178	1.06104	1.15918	3.07959			120.44	6.94336	5.27441	2.62598	1.24121	5.50195			56.04	0.506836	0.562012	1.37158	2.18652			133.44	1.01514	1.34277	1.80957	2.27686	4.39551
	134.84	0.868164	1.30811	1.05713	1.15527	3.07764			120.54	5.19698	4.58175	2.56027	1.27051	4.78878			56.14	0.510742	0.575684	1.37158	2.18066			133.54	1.0288	1.33886	1.81152	2.28369	4.40331
	134.94	0.862305	1.30615	1.05127	1.14941	3.06201			120.64	4.60352	3.80762	2.81152	1.08984	3.55176			56.24	0.500977	0.567871	1.36182	2.1709			133.64	1.00928	1.32324	1.80371	2.26709	4.39844
	135.04	0.866211	1.31982	1.04932	1.14746	3.06006			120.84	3.65003	2.75453	2.53285	1.37598	2.48011			56.34	0.500977	0.575684	1.36182	2.18457			133.74	1.00634	1.33398	1.80761	2.27392	4.4082
	135.14	0.858398	1.31787	1.03955	1.13379	3.05615			120.94	2.94727	2.24805	2.07324	1.53027	2.12402			56.44	0.487305	0.565918	1.36182	2.18652			133.94	1.00146	1.32324	1.80957	2.26709	4.40527
	135.24	0.852539	1.30225	1.03955	1.12793	3.06396			121.04	3.11996	2.3348	2.27035	1.41992	2.21078			56.54	0.481445	0.563965	1.36572	2.18262			134.04	0.997553	1.32324	1.81347	2.26318	4.41308
	135.34	0.852539	1.30225	1.04932	1.13379	3.06982			121.14	2.64258	1.96387	2.25	1.62793	1.91797			56.64	0.483398	0.581543	1.3833	2.19629			134.14	0.989746	1.30957	1.79395	2.25537	4.40723
	135.44	0.852539	1.30225	1.03955	1.13965	3.06982			121.24	2.40425	2.15328	2.1484	1.49902	1.77144			56.74	0.483398	0.571777	1.37158	2.18457			134.24	0.987789	1.31543	1.80175	2.25048	4.41699
	135.54	0.852539	1.31201	1.03955	1.13965	3.06006			121.34	2.3291	2.11817	1.78516	1.61914	1.66992			56.84	0.469727	0.562988	1.35791	2.17676			134.34	0.992676	1.32422	1.80762	2.26025	4.41699
	135.64	0.838867	1.31201	1.0376	1.12598	3.05615			121.44	2.29004	1.91602	1.79004	1.4707	1.74512			56.94	0.463867	0.577637	1.36572	2.1709			134.44	0.98584	1.3125	1.80566	2.24365	4.40527
	135.74	0.836914	1.30811	1.03174	1.12012	3.05029			121.54	2.13475	2.08592	2.19139	1.23828	1.95897			57.04	0.467773	0.583496	1.36572	2.16113			134.54	0.980953	1.31347	1.80566	2.23779	4.41699
	135.84	0.842773	1.30225	1.03662	1.12012	3.05225			121.64	2.42285	2.08496	2.04492	1.375	1.87793			57.14	0.47168	0.587402	1.38135	2.16504			134.64	0.991699	1.32324	1.80566	2.24756	4.43066
	135.94	0.84082	1.29443	1.0415	1.12793	3.05029			121.74	2.64842	2.22557	2.1865	1.47949	1.99998			57.24	0.482422	0.589355	1.38232	2.17676			134.74	0.983881	1.31347	1.81152	2.23974	4.42675
	136.04	0.842773	1.30029	1.0415	1.13184	3.06006			121.84	2.63867	2.21485	2.1836	1.6377	1.98438			57.34	0.477539	0.577637	1.37354	2.16113			134.84	0.970215	1.2998	1.80371	2.22607	4.41309
	136.14	0.838867	1.30225	1.0415	1.12793	3.05029			121.94	2.53418	2.00391	2.10156	1.5918	1.8291			57.44	0.483398	0.593262	1.38721	2.1748			134.94	0.967285	1.30469	1.79785	2.22314	4.41699
	136.24	0.829102	1.29834	1.03271	1.12402	3.04639			122.04	2.56056	1.94825	2.14259	1.37793	1.84181			57.54	0.482422	0.592285	1.38818	2.17578			135.04	0.970211	1.30175	1.80566	2.23193	4.41504
	136.34	0.823242	1.28662	1.0249	1.1084	3.04053			122.14	2.53125	1.88379	2.04297	1.23828	1.77734			57.64	0.481445	0.585449	1.38525	2.17285			135.14	0.97998	1.31641	1.80566	2.24072	4.41699
	136.44	0.827148	1.29248	1.03369	1.12012	3.04053			122.24	2.48438	1.87793	2.07813	1.30664	1.75977			57.74	0.481445	0.597168	1.39111	2.17285			135.24	0.979977	1.31933	1.80566	2.24755	4.43066
	136.54	0.833008	1.29248	1.03369	1.12012	3.04053			122.34	2.39063	1.9629	2.09962	1.41016	1.6836			57.84	0.481445	0.589355	1.39111	2.18164			135.34	0.977051	1.30371	1.81348	2.24365	4.44238
	136.64	0.821289	1.271	1.01221	1.1084	3.03076			122.44	2.35938	1.9541	2.0752	1.44531	1.68457			57.94	0.495117	0.593262	1.39502	2.18848			135.44	0.974121	1.30371	1.79785	2.22998	4.43652
	136.74	0.817383	1.28076	1.02197	1.11035	3.03662			122.54	2.37989	1.93263	2.00294	1.48535	1.5879			58.04	0.487305	0.589355	1.38525	2.18848			135.54	0.978024	1.30566	1.80761	2.23974	4.43652
	136.84	0.811523	1.28076	1.03174	1.09863	3.03076			122.64	2.41895	1.92285	1.99609	1.45605	1.60547			58.14	0.485352	0.594238	1.3833	2.17871			135.64	0.98291	1.30859	1.80664	2.23486	4.43848
	136.94	0.801758	1.28076	1.01807	1.09863	3.03076			122.74	2.42774	1.90919	1.97657	1.43262	1.6377			58.24	0.489258	0.599121	1.38721	2.18066			135.74	0.989742	1.32129	1.81347	2.22607	4.44629
	137.04	0.793945	1.26123	1.00244	1.08887	3.021			122.84	2.4375	1.93262	1.99414	1.42578	1.69336			58.34	0.489258	0.593262	1.38135	2.18066			135.84	0.989746	1.32129	1.81641	2.22607	4.43652
	137.14	0.78418	1.26514	1.00244	1.09082	3.03076			122.94	2.46484	1.97949	2.02148	1.44727	1.73438			58.44	0.475586	0.593262	1.38525	2.18066			135.94	0.976074	1.31836	1.80371	2.21338	4.43262
	137.24	0.793945	1.28271	1.01221	1.10059	3.04053			123.04	2.49414	1.96778	2.02735	1.45508	1.74414			58.54	0.491211	0.597168	1.39111	2.18066			136.04	0.971188	1.31347	1.79785	2.22021	4.42675
	137.34	0.793945	1.28271	1.01416	1.10059	3.03857			123.14	2.50781	1.98926	2.01465	1.45313	1.74805			58.64	0.491211	0.603027	1.40088	2.18457			136.14	0.964355	1.30566	1.80176	2.21045	4.40723
	137.44	0.793945	1.28271	1.0083	1.10059	3.03271			123.24	2.47852	2.00488	2.04395	1.43457	1.77246			58.74	0.491211	0.593262	1.39111	2.18652			136.24	0.978025	1.30957	1.81152	2.22803	4.41113
	137.54	0.791992	1.271	1.02197	1.09863	3.03076			123.34	2.47071	2.00879	2.03712	1.44824	1.78809			58.84	0.496094	0.603027	1.39111	2.18457			136.34	0.983887	1.32129	1.82715	2.23975	4.42676
	137.64	0.791992	1.26123	1.01221	1.09863	3.03076			123.44	2.43945	1.98242	2.04297	1.42578	1.74512			58.94	0.512695	0.60498	1.396	2.18848			136.44	0.977051	1.30859	1.82031	2.229	4.42188
	137.74	0.801758	1.28076	1.02197	1.1084	3.04053			123.54	2.40235	2	2.04004	1.41602	1.75098			59.04	0.508789	0.606934	1.40869	2.19824			136.54	0.970211	1.29589	1.82031	2.22412	4.40527
	137.84	0.801758	1.2749	1.02197	1.1084	3.03076			123.64	2.38867	2.00879	2.02246	1.41406	1.7334			59.14	0.506836	0.595215	1.39307	2.19824			136.64	0.964355	1.30176	1.82129	2.229	4.39648
	137.94	0.797852	1.27686	1.01807	1.10645	3.02686			123.74	2.33595	1.97755	2.00489	1.41211	1.72364			59.24	0.512695	0.601074	1.39502	2.19824			136.74	0.98193	1.30175	1.83691	2.22998	4.39746
	138.04	0.797852	1.25732	1.01221	1.10059	3.021			123.84	2.34571	1.98145	2.02832	1.4082	1.72071			59.34	0.518555	0.616699	1.4126	2.2041			136.84	0.974121	1.30078	1.83301	2.22607	4.39746
	138.14	0.803711	1.25537	1.01221	1.10059	3.03076			123.94	2.34473	1.97949	2.0332	1.43164	1.72754			59.44	0.524414	0.616699	1.40674	2.2002			136.94	0.973145	1.30176	1.83691	2.22607	4.39746
	138.24	0.799805	1.25732	1.0083	1.09277	3.01709			124.04	2.33497	1.9629	2.03126	1.44629	1.72755			59.54	0.514648	0.618652	1.40869	2.19141			137.04	0.972164	1.29394	1.83691	2.21826	4.3955
	138.34	0.78418	1.2417	1.00439	1.08105	3.01318			124.14	2.33203	1.94141	2.0293	1.41699	1.74219			59.64	0.518555	0.616699	1.40674	2.20215			137.14	0.972168	1.30371	1.83301	2.21826	4.40332
	138.44	0.78418	1.24365	1.00439	1.09082	3.02295			124.24	2.32813	1.94043	2.01758	1.40234	1.73731			59.74	0.53418	0.622559	1.4126	2.20605			137.24	0.976072	1.30762	1.83594	2.22217	4.40137
	138.54	0.793945	1.25342	1.01416	1.10059	3.03271			124.34	2.31446	1.9209	1.99805	1.39453	1.71876			59.84	0.536133	0.622559	1.42627	2.21191			137.34	0.992676	1.3125	1.84766	2.22314	4.40625
	138.64	0.782227	1.2417	1.00244	1.08887	3.01709			124.44	2.27637	1.90625	1.96582	1.38477	1.69434			59.94	0.537109	0.61084	1.42139	2.20117			137.44	0.991699	1.32324	1.85645	2.22803	4.40625
	138.74	0.767578	1.23682	0.987793	1.08594	3.00635			124.54	2.2627	1.89747	1.98438	1.35059	1.69727			60.04	0.53418	0.620605	1.43018	2.2002			137.54	0.997557	1.31933	1.85254	2.22803	4.41308
	138.84	0.770508	1.22998	0.984863	1.0791	3.00342			124.64	2.26367	1.90137	1.9834	1.32617	1.68555			60.14	0.540039	0.614746	1.42432	2.19238			137.64	1.00537	1.32715	1.8623	2.2417	4.41113
	138.94	0.760742	1.22998	0.990723	1.0791	3.00537			124.74	2.25977	1.90821	1.97462	1.30957	1.6836			60.24	0.553711	0.624512	1.43018	2.20215			137.74	1.01123	1.333	1.86816	2.24853	4.41308
	139.04	0.772461	1.23975	1.00049	1.08301	3.01123			124.84	2.23829	1.90137	1.98438	1.31445	1.66993			60.34	0.549805	0.630371	1.42432	2.19824			137.84	1.00928	1.33203	1.86621	2.25342	4.41699
	139.14	0.782227	1.23975	1.00049	1.09863	3.01514			124.94	2.24512	1.90234	1.97559	1.30664	1.66406			60.44	0.55957	0.626465	1.42432	2.2041			137.94	1.01123	1.32715	1.86035	2.24365	4.40723
	139.24	0.782227	1.23975	1.00244	1.09863	3.01123			125.04	2.2461	1.8877	1.97462	1.30176	1.66407			60.54	0.549805	0.614746	1.41846	2.19238			138.04	1.0122	1.33105	1.87597	2.24951	4.41699
	139.34	0.791992	1.22998	1.00244	1.09473	3.01123			125.14	2.23242	1.8916	1.97949	1.27734	1.65625			60.64	0.55957	0.630371	1.42334	2.20801			138.14	1.01318	1.31543	1.8623	2.23975	4.40723
	139.44	0.799805	1.22607	0.996582	1.08301	2.99561			125.24	2.23829	1.90137	1.99024	1.28125	1.66797			60.74	0.560547	0.620605	1.42627	2.19824			138.24	1.00927	1.31543	1.85644	2.24951	4.40722
	139.54	0.797852	1.22021	0.990723	1.0791	2.98975			125.34	2.23047	1.90332	1.9961	1.2832	1.66407			60.84	0.567383	0.632324	1.4165	2.2002			138.34	0.992676	1.30469	1.8584	2.23877	4.40625
	139.64	0.801758	1.22021	0.990723	1.0791	2.98975			125.44	2.22656	1.90137	1.99805	1.28516	1.65039			60.94	0.563477	0.626465	1.4126	2.19434			138.44	1.00537	1.30566	1.86035	2.23975	4.40918
	139.74	0.805664	1.22021	0.990723	1.0791	2.98975			125.54	2.2295	1.90332	1.99805	1.27539	1.64649			61.04	0.563477	0.628418	1.42236	2.20605			138.54	1.01123	1.31738	1.8623	2.25732	4.42089
	139.84	0.811523	1.22998	1.00049	1.09863	2.99951			125.64	2.21875	1.89844	1.99023	1.27344	1.63477			61.14	0.567383	0.620605	1.42041	2.20898			138.64	1.01904	1.30566	1.86035	2.25244	4.41016
	139.94	0.807617	1.20654	0.986816	1.08496	2.98584			125.74	2.22461	1.8877	1.98243	1.25977	1.62891			61.24	0.573242	0.638184	1.43213	2.21777			138.74	1.04053	1.32324	1.86621	2.25928	4.42285
	140.04	0.797852	1.20068	0.98291	1.0791	2.97021			125.84	2.23829	1.88379	1.98438	1.26465	1.64258			61.34	0.563477	0.624512	1.43213	2.2041			138.84	1.05029	1.32324	1.87012	2.26318	4.4209
	140.14	0.801758	1.21045	0.98291	1.08887	2.98193			125.94	2.22852	1.87793	1.97461	1.25586	1.63672			61.44	0.577148	0.640137	1.42627	2.21973			138.94	1.05908	1.31934	1.87988	2.26514	4.41895
	140.24	0.776367	1.19482	0.95752	1.0752	2.96631			126.04	2.22657	1.87793	1.96875	1.26172	1.63672			61.54	0.571289	0.630371	1.43213	2.21387			139.04	1.06787	1.32324	1.87207	2.27295	4.42285
	140.34	0.78418	1.20459	0.955566	1.09277	2.96436			126.14	2.23242	1.86621	1.96094	1.26172	1.63672			61.64	0.581055	0.630371	1.43408	2.22949			139.14	1.06201	1.32617	1.87207	2.26318	4.42285
	140.44	0.797852	1.20654	0.95752	1.08496	2.96631			126.24	2.23536	1.87305	1.97364	1.26172	1.62793			61.74	0.581055	0.631348	1.44971	2.22949			139.24	1.07177	1.3291	1.87207	2.25732	4.42675
	140.54	0.795898	1.20459	0.941895	1.08301	2.96436			126.34	2.22461	1.86231	1.97071	1.25684	1.62305			61.84	0.575195	0.632324	1.44482	2.21973			139.34	1.06787	1.31543	1.85645	2.24951	4.42676
	140.64	0.791992	1.22021	0.932129	1.08887	2.97021			126.44	2.22266	1.87207	1.97656	1.24609	1.60547			61.94	0.59082	0.632324	1.45166	2.2334			139.44	1.06396	1.3252	1.86426	2.24561	4.43457
	140.74	0.788086	1.21631	0.928223	1.08496	2.97607			126.54	2.20704	1.86231	1.96876	1.24023	1.60157			62.04	0.581055	0.628418	1.44189	2.22559			139.54	1.06787	1.32519	1.85254	2.24365	4.42285
	140.84	0.782227	1.21045	0.912598	1.0791	2.97412			126.64	2.20117	1.86816	1.97656	1.23633	1.60742			62.14	0.59082	0.626465	1.4458	2.22949			139.64	1.06689	1.32813	1.85156	2.25732	4.43164
	140.94	0.772461	1.22217	0.912598	1.0791	2.96631			126.74	2.21289	1.84864	1.98829	1.23828	1.60352			62.24	0.585938	0.622559	1.45166	2.2334			139.74	1.06396	1.32519	1.85937	2.26123	4.43847
	141.04	0.77832	1.23193	0.912598	1.08887	2.98584			126.84	2.20899	1.85645	1.99219	1.24219	1.60547			62.34	0.592773	0.626465	1.45166	2.24316			139.84	1.06982	1.33301	1.85254	2.26514	4.44434
	141.14	0.782227	1.22217	0.902832	1.09082	2.9917			126.94	2.2207	1.86035	2.00586	1.24219	1.60938			62.44	0.59668	0.620605	1.45557	2.24902			139.94	1.07275	1.32324	1.84668	2.24951	4.44629
	141.24	0.78418	1.23193	0.898926	1.10059	2.98779			127.04	2.21289	1.8584	2.00977	1.25977	1.60352			62.54	0.608398	0.632324	1.46729	2.25098			140.04	1.06982	1.3291	1.84668	2.2456	4.45215
	141.34	0.793945	1.2417	0.902832	1.10059	2.99561			127.14	2.2168	1.85449	2.00195	1.25977	1.60156			62.64	0.600586	0.618652	1.46924	2.24121			140.14	1.06787	1.32715	1.8584	2.25342	4.46094
	141.44	0.801758	1.24951	0.891113	1.1084	2.99951			127.24	2.21485	1.8545	2.00782	1.27539	1.59961			62.74	0.608398	0.616699	1.46338	2.24316			140.24	1.08349	1.33886	1.84863	2.25537	4.47363
	141.54	0.797852	1.23975	0.887207	1.09863	2.99561			127.34	2.22852	1.8545	2.00782	1.27734	1.60547			62.84	0.602539	0.616699	1.46729	2.24902			140.34	1.08154	1.32617	1.83691	2.25146	4.46191
	141.64	0.791992	1.23975	0.871582	1.09863	2.98975			127.44	2.24023	1.86621	2.01563	1.28906	1.60547			62.94	0.606445	0.632324	1.4751	2.25391			140.44	1.09131	1.35059	1.85645	2.26904	4.4873
	141.74	0.791992	1.23975	0.871582	1.09863	2.98975			127.54	2.23243	1.8584	2.00001	1.30078	1.59766			63.04	0.612305	0.622559	1.47119	2.25098			140.54	1.09131	1.34863	1.86035	2.26904	4.49707
	141.84	0.788086	1.23779	0.85791	1.09473	2.98779			127.64	2.23633	1.87402	2.00391	1.30078	1.60156			63.14	0.606445	0.616699	1.46533	2.25488			140.64	1.08154	1.35059	1.87207	2.26514	4.50684
	141.94	0.78418	1.23193	0.837402	1.0791	2.98193			127.74	2.24219	1.86817	2.00977	1.3125	1.59766			63.24	0.62207	0.632324	1.48096	2.27051			140.74	1.07959	1.34472	1.85449	2.25928	4.49316
	142.04	0.78418	1.23779	0.820801	1.08105	2.98193			127.84	2.23047	1.86817	2.00977	1.32031	1.60938			63.34	0.62207	0.632324	1.48096	2.27051			140.84	1.07764	1.35449	1.85254	2.27295	4.49316
	142.14	0.78418	1.23584	0.820801	1.08105	2.9917			127.94	2.23047	1.87598	2.01758	1.30859	1.61719			63.44	0.62207	0.622559	1.47119	2.26465			140.94	1.10693	1.36621	1.87207	2.28857	4.52246
	142.24	0.786133	1.23975	0.812988	1.08301	2.99365			128.04	2.23047	1.87598	2.01758	1.31641	1.60547			63.54	0.611328	0.609863	1.47119	2.25586			141.04	1.10791	1.36523	1.87304	2.29931	4.52343
	142.34	0.797852	1.24951	0.818848	1.09863	3.00928			128.14	2.23047	1.86426	2.00586	1.31055	1.58984			63.64	0.610352	0.618652	1.47119	2.24902			141.14	1.08936	1.35254	1.85547	2.29248	4.50488
	142.44	0.77832	1.25732	0.80127	1.09473	2.99561			128.24	2.23047	1.85645	2.00977	1.31055	1.58789			63.74	0.615234	0.61377	1.4751	2.25293			141.24	1.08935	1.3584	1.8623	2.29248	4.51074
	142.54	0.762695	1.2417	0.77002	1.0791	2.97998			128.34	2.23829	1.86817	2.02539	1.32031	1.59571			63.84	0.62207	0.620605	1.48096	2.24902			141.34	1.09131	1.35645	1.86035	2.2915	4.50879
	142.64	0.762695	1.2417	0.756348	1.06934	2.98193			128.44	2.24414	1.87598	2.03125	1.32813	1.58984			63.94	0.625977	0.620605	1.48096	2.25098			141.44	1.09229	1.37207	1.86426	2.3042	4.52734
	142.74	0.762695	1.26123	0.740723	1.0791	2.98779			128.54	2.23243	1.86621	2.02735	1.3418	1.59766			64.04	0.616211	0.61084	1.46924	2.24316			141.54	1.09326	1.36035	1.84472	2.30029	4.51465
	142.84	0.762695	1.25146	0.740723	1.08301	2.98193			128.64	2.23242	1.88965	2.05078	1.3418	1.59766			64.14	0.625977	0.622559	1.4751	2.24316			141.64	1.09326	1.3584	1.84277	2.31006	4.50879
	142.94	0.75293	1.2417	0.717285	1.08105	2.97217			128.74	2.22462	1.87794	2.03126	1.33789	1.58594			64.24	0.631836	0.616699	1.48096	2.23926			141.74	1.0913	1.37304	1.84277	2.31787	4.5166
	143.04	0.741211	1.22607	0.699707	1.0791	2.97021			128.84	2.22071	1.87793	2.01954	1.32422	1.58008			64.34	0.641602	0.622559	1.48096	2.25293			141.84	1.08154	1.36426	1.84082	2.31787	4.50684
	143.14	0.739258	1.22021	0.689941	1.0791	2.97021			128.94	2.2207	1.87793	2.02344	1.32031	1.57617			64.44	0.641602	0.622559	1.47705	2.25488			141.94	1.08154	1.37012	1.85254	2.32568	4.5166
	143.24	0.743164	1.22998	0.686035	1.09863	2.97021			129.04	2.20118	1.8584	2.00977	1.32813	1.56348			64.54	0.62793	0.622559	1.47119	2.24023			142.04	1.0874	1.3584	1.84082	2.32373	4.51855
	143.34	0.723633	1.22217	0.660645	1.08887	2.97021			129.14	2.2207	1.87012	2.00586	1.32031	1.55664			64.64	0.631836	0.622559	1.4751	2.25098			142.14	1.09326	1.37598	1.85449	2.34521	4.51855
	143.44	0.723633	1.21826	0.650879	1.08887	2.97021			129.24	2.22071	1.86621	2	1.33203	1.55664			64.74	0.635742	0.624512	1.48096	2.25488			142.24	1.08838	1.38086	1.85742	2.33838	4.52343
	143.54	0.713867	1.20264	0.641113	1.08496	2.96045			129.34	2.23243	1.88184	2.00782	1.31641	1.57618			64.84	0.637695	0.640137	1.47705	2.27051			142.34	1.08545	1.37793	1.86621	2.35303	4.53027
	143.64	0.713867	1.2124	0.631348	1.0791	2.9624			129.44	2.2207	1.87988	1.99512	1.32227	1.55664			64.94	0.641602	0.640137	1.4751	2.27051			142.44	1.08936	1.3877	1.87402	2.36279	4.5459
	143.74	0.708984	1.20264	0.60791	1.06934	2.9624			129.54	2.22071	1.86817	1.98829	1.29883	1.55664			65.04	0.641602	0.640137	1.46729	2.27051			142.54	1.08935	1.38574	1.87597	2.3706	4.55566
	143.84	0.692383	1.2124	0.592285	1.07129	2.97217			129.64	2.2207	1.86816	1.96875	1.30078	1.55273			65.14	0.651367	0.640137	1.4751	2.26855			142.64	1.09033	1.40332	1.88574	2.38232	4.55566
	143.94	0.680664	1.20068	0.561035	1.05957	2.96045			129.74	2.22071	1.86426	1.97657	1.28125	1.54688			65.24	0.637695	0.630371	1.46533	2.25879			142.74	1.0874	1.39941	1.88183	2.38428	4.55176
	144.04	0.670898	1.19092	0.541504	1.05957	2.96045			129.84	2.20118	1.84669	1.96485	1.28125	1.53516			65.34	0.637695	0.632324	1.46143	2.26074			142.84	1.0874	1.39746	1.88574	2.38232	4.55957
	144.14	0.666992	1.19092	0.527832	1.0498	2.95654			129.94	2.20117	1.84668	1.95508	1.28125	1.54297			65.44	0.629883	0.633301	1.45264	2.25098			142.94	1.08936	1.41309	1.88574	2.39404	4.56152
	144.24	0.661133	1.19092	0.502441	1.0498	2.95068			130.04	2.18165	1.83497	1.94727	1.26953	1.53712			65.54	0.637695	0.638184	1.46338	2.26074			143.04	1.08935	1.40918	1.88183	2.39404	4.55176
	144.34	0.666992	1.18506	0.486816	1.05371	2.95654			130.14	2.17773	1.81738	1.92773	1.25	1.51758			65.64	0.629883	0.630371	1.45361	2.24707			143.14	1.0874	1.41309	1.87793	2.40283	4.5625
	144.44	0.672852	1.19287	0.48291	1.0498	2.9624			130.24	2.17579	1.81739	1.92383	1.2373	1.51758			65.74	0.637695	0.64209	1.45752	2.24902			143.24	1.0874	1.41308	1.88671	2.40576	4.56347
	144.54	0.668945	1.19287	0.469238	1.0498	2.97217			130.34	2.18165	1.82129	1.90235	1.23828	1.50977			65.84	0.62793	0.640137	1.45947	2.25684			143.34	1.07178	1.39941	1.87402	2.396	4.55762
	144.64	0.661133	1.20068	0.45166	1.04785	2.97021			130.44	2.18164	1.82715	1.91211	1.23438	1.51172			65.94	0.625977	0.63623	1.45752	2.25488			143.44	1.06787	1.4043	1.87402	2.396	4.56348
	144.74	0.670898	1.20068	0.441895	1.05762	2.97607			130.54	2.16993	1.83496	1.90625	1.23633	1.50586			66.04	0.631836	0.64209	1.45361	2.25098			143.54	1.06787	1.40527	1.86816	2.40381	4.57324
	144.84	0.661133	1.19092	0.41748	1.0459	2.97021			130.64	2.16992	1.83887	1.91797	1.22656	1.49414			66.14	0.626953	0.641113	1.4624	2.26074			143.64	1.06885	1.4043	1.87695	2.40869	4.57422
	144.94	0.661133	1.17725	0.391113	1.04004	2.96826			130.74	2.14063	1.81934	1.89454	1.22656	1.47657			66.24	0.634766	0.644043	1.46143	2.25879			143.74	1.07568	1.41308	1.87793	2.41943	4.56738
									130.84	2.13282	1.82715	1.88868	1.18945	1.46875			66.34	0.62793	0.640137	1.46143	2.24902			143.84	1.06982	1.40137	1.87598	2.40771	4.56543
									130.94	2.14258	1.83496	1.89453	1.20117	1.47461			66.44	0.62207	0.649902	1.47119	2.25293			143.94	1.06982	1.40918	1.88184	2.41357	4.56152
									131.04	2.15039	1.8252	1.89649	1.21094	1.45704			66.54	0.62207	0.640137	1.46338	2.24902			144.04	1.07568	1.40332	1.87597	2.40381	4.56543
									131.14	2.15039	1.81543	1.89258	1.21094	1.45703			66.64	0.631836	0.640137	1.46533	2.24902			144.14	1.07568	1.40332	1.87598	2.40771	4.57715
									131.24	2.15039	1.81543	1.875	1.21484	1.46485			66.74	0.631836	0.654785	1.45947	2.25879			144.24	1.07763	1.41308	1.88769	2.39404	4.57324
									131.34	2.14454	1.81641	1.87305	1.20898	1.4629			66.84	0.62207	0.651855	1.46338	2.25293			144.34	1.07666	1.40332	1.8877	2.39404	4.57129
									131.44	2.15039	1.81543	1.88672	1.21484	1.45313			66.94	0.637695	0.66748	1.47119	2.26074			144.44	1.0835	1.39355	1.89746	2.3999	4.57715
									131.54	2.14258	1.81544	1.87501	1.21289	1.43555			67.04	0.629883	0.663574	1.46143	2.25098			144.54	1.08349	1.40527	1.89355	2.39599	4.583
									131.64	2.12695	1.81152	1.86133	1.19922	1.43945			67.14	0.637695	0.665527	1.46143	2.26074			144.64	1.08154	1.39355	1.88965	2.37842	4.58105
									131.74	2.15235	1.8252	1.87891	1.19141	1.43946			67.24	0.641602	0.675293	1.47607	2.27441			144.74	1.07178	1.39746	1.88769	2.36865	4.57715
									131.84	2.14844	1.81543	1.87403	1.19141	1.44239			67.34	0.631836	0.677246	1.46924	2.2666			144.84	1.07373	1.39941	1.89746	2.37451	4.58301
									131.94	2.13867	1.81543	1.88672	1.19922	1.43555			67.44	0.631836	0.675293	1.46338	2.2627			144.94	1.0835	1.39746	1.90723	2.37256	4.58105
									132.04	2.15039	1.83106	1.89454	1.19922	1.43555			67.54	0.631836	0.690918	1.45752	2.26465			145.04	1.06982	1.39941	1.89355	2.3667	4.59277
									132.14	2.13086	1.81738	1.89453	1.21094	1.42773			67.64	0.631836	0.690918	1.46533	2.27246			145.14	1.07568	1.39746	1.89551	2.35889	4.58691
									132.24	2.14258	1.83692	1.9043	1.21094	1.42383			67.74	0.631836	0.694824	1.47119	2.27832			145.24	1.06787	1.38965	1.89746	2.35498	4.58301
									132.34	2.14942	1.83692	1.91016	1.21484	1.42969			67.84	0.645508	0.710449	1.48486	2.2832			145.34	1.07373	1.38379	1.90723	2.35303	4.58105
									132.44	2.15625	1.83301	1.91602	1.2207	1.43164			67.94	0.641602	0.705566	1.48096	2.28027			145.44	1.06787	1.38379	1.90723	2.34912	4.58691
									132.54	2.16016	1.83692	1.91211	1.20898	1.42188			68.04	0.631836	0.69873	1.46729	2.27637			145.54	1.05908	1.36914	1.89258	2.33838	4.57226
									132.64	2.16016	1.83301	1.91797	1.2168	1.42773			68.14	0.643555	0.70459	1.46729	2.27637			145.64	1.0542	1.36523	1.8877	2.33154	4.56348
									132.74	2.15625	1.82325	1.91016	1.19922	1.41602			68.24	0.641602	0.708496	1.48291	2.29199			145.74	1.06005	1.38183	1.90527	2.32959	4.57519
									132.84	2.16016	1.82715	1.92383	1.19434	1.41602			68.34	0.641602	0.724121	1.48682	2.2959			145.84	1.05615	1.37402	1.8916	2.32764	4.56152
									132.94	2.1875	1.84668	1.94141	1.18359	1.43555			68.44	0.641602	0.728027	1.50244	2.31152			145.94	1.06201	1.38379	1.88574	2.32764	4.56934
									133.04	2.18751	1.84278	1.92774	1.20898	1.43165			68.54	0.636719	0.722168	1.49268	2.30566			146.04	1.06592	1.38379	1.88086	2.32763	4.57519
									133.14	2.18945	1.84863	1.92383	1.18555	1.4375			68.64	0.643555	0.73584	1.50635	2.30957			146.14	1.06201	1.3877	1.87793	2.33252	4.5752
									133.24	2.19727	1.86426	1.9375	1.19922	1.44532			68.74	0.647461	0.741699	1.50244	2.31348			146.24	1.07177	1.38964	1.88379	2.33545	4.57129
									133.34	2.19922	1.8584	1.9375	1.21094	1.45508			68.84	0.643555	0.73584	1.50244	2.30957			146.34	1.06982	1.37598	1.87012	2.32764	4.56055
									133.44	2.19629	1.84766	1.93848	1.19531	1.44824			68.94	0.643555	0.741699	1.50244	2.32324			146.44	1.06396	1.37402	1.86621	2.31982	4.55762
									133.54	2.19141	1.86036	1.94727	1.19434	1.44922			69.04	0.65332	0.751465	1.51221	2.33496			146.54	1.06787	1.36035	1.86426	2.31592	4.54394
									133.64	2.19922	1.86328	1.94727	1.18945	1.45703			69.14	0.643555	0.741699	1.50049	2.31934			146.64	1.06201	1.36816	1.86816	2.31982	4.54785
									133.74	2.20313	1.86036	1.94727	1.18555	1.45606			69.24	0.643555	0.751465	1.50049	2.32324			146.74	1.04638	1.3584	1.85644	2.3081	4.54199
									133.84	2.19532	1.84473	1.93262	1.17188	1.44532			69.34	0.635742	0.745605	1.50439	2.3291			146.84	1.05029	1.35254	1.85645	2.31787	4.54004
									133.94	2.19336	1.84863	1.92969	1.16406	1.45703			69.44	0.643555	0.757324	1.52197	2.33496			146.94	1.04541	1.34668	1.84668	2.31396	4.54785
									134.04	2.2168	1.84863	1.9336	1.16211	1.46875			69.54	0.632813	0.758301	1.51123	2.33594			147.04	1.04834	1.33886	1.84668	2.30615	4.53418
									134.14	2.20703	1.84473	1.93164	1.17773	1.45703			69.64	0.631836	0.745605	1.50049	2.32422			147.14	1.03467	1.3291	1.84863	2.30029	4.51855
									134.24	2.19336	1.84864	1.9375	1.17578	1.45704			69.74	0.635742	0.751465	1.51514	2.33105			147.24	1.03662	1.33301	1.84668	2.3081	4.53027
									134.34	2.20118	1.85645	1.9336	1.17383	1.46094			69.84	0.635742	0.756348	1.51221	2.33496			147.34	1.04834	1.33887	1.84277	2.31396	4.53223
									134.44	2.20117	1.84473	1.93164	1.16992	1.45898			69.94	0.62793	0.759277	1.50244	2.32715			147.44	1.05225	1.33301	1.85059	2.30811	4.52637
									134.54	2.21289	1.84473	1.92578	1.16992	1.47657			70.04	0.625977	0.755371	1.51221	2.32324			147.54	1.04248	1.33301	1.85644	2.31006	4.51855
									134.64	2.19727	1.83496	1.91602	1.17383	1.46094			70.14	0.62207	0.755371	1.50635	2.3291			147.64	1.05029	1.3291	1.85449	2.30615	4.52832
									134.74	2.1836	1.83496	1.92383	1.1543	1.4668			70.24	0.625	0.76123	1.51221	2.34277			147.74	1.03857	1.3291	1.84863	2.3042	4.51855
									134.84	2.19141	1.83301	1.91797	1.15234	1.45508			70.34	0.631836	0.770996	1.52588	2.34863			147.84	1.04932	1.33008	1.84766	2.31494	4.51367
									134.94	2.18652	1.81543	1.91406	1.15234	1.46289			70.44	0.645508	0.774902	1.5415	2.3584			147.94	1.04053	1.31152	1.83496	2.30811	4.50488
									135.04	2.17969	1.81544	1.89649	1.14355	1.44532			70.54	0.641602	0.780762	1.52979	2.35254			148.04	1.04052	1.31152	1.84472	2.31787	4.50488
									135.14	2.19141	1.81934	1.90039	1.12891	1.46094			70.64	0.631836	0.780762	1.53369	2.36816			148.14	1.03076	1.30762	1.83496	2.3042	4.49121
									135.24	2.19141	1.81934	1.9043	1.14063	1.46485			70.74	0.645508	0.784668	1.54932	2.36816			148.24	1.04248	1.3164	1.83691	2.3081	4.49707
									135.34	2.19922	1.81934	1.90235	1.14063	1.47071			70.84	0.645508	0.790527	1.54346	2.3623			148.34	1.04639	1.3252	1.84668	2.31787	4.51074
									135.44	2.21875	1.81543	1.89258	1.14063	1.46094			70.94	0.651367	0.794434	1.54932	2.37207			148.44	1.03662	1.31934	1.83105	2.3042	4.50098
									135.54	2.22657	1.81934	1.89844	1.14844	1.45899			71.04	0.649414	0.808105	1.55127	2.38574			148.54	1.04052	1.31347	1.82519	2.29834	4.49511
									135.64	2.20898	1.80371	1.89844	1.16016	1.46289			71.14	0.635742	0.796387	1.5415	2.37012			148.64	1.03467	1.30371	1.8291	2.28857	4.49512
									135.74	2.22852	1.79786	1.88184	1.15625	1.44532			71.24	0.641602	0.800293	1.54541	2.38379			148.74	1.05029	1.31347	1.83496	2.30224	4.50097
									135.84	2.23243	1.79297	1.88672	1.14648	1.44532			71.34	0.645508	0.804199	1.55127	2.37988			148.84	1.04248	1.31543	1.83691	2.29834	4.50684
									135.94	2.2207	1.79004	1.89063	1.15039	1.43848			71.44	0.665039	0.810059	1.55615	2.37988			148.94	1.05615	1.31934	1.83691	2.29834	4.51074
									136.04	2.22071	1.7959	1.89649	1.1582	1.44532			71.54	0.657227	0.811035	1.54736	2.38086			149.04	1.06005	1.333	1.83496	2.30615	4.51464
									136.14	2.21289	1.79199	1.88477	1.1582	1.44141			71.64	0.665039	0.812012	1.54541	2.37988			149.14	1.04639	1.3291	1.82617	2.29443	4.51074
									136.24	2.20899	1.79786	1.88672	1.15039	1.43555			71.74	0.661133	0.806152	1.55518	2.37402			149.24	1.04053	1.33691	1.82715	2.29834	4.5166
									136.34	2.22852	1.78223	1.88672	1.1543	1.44336			71.84	0.665039	0.812012	1.56104	2.38965			149.34	1.0542	1.34277	1.83691	2.31201	4.52637
									136.44	2.22852	1.77637	1.89453	1.14844	1.44727			71.94	0.670898	0.825684	1.56494	2.38965			149.44	1.06201	1.34863	1.83691	2.31787	4.52637
									136.54	2.21485	1.77637	1.86915	1.13672	1.43946			72.04	0.661133	0.825684	1.56104	2.38965			149.54	1.05224	1.35449	1.83887	2.31787	4.52637
									136.64	2.2207	1.77637	1.86719	1.13086	1.43359			72.14	0.671875	0.827637	1.56104	2.38965			149.64	1.05225	1.36426	1.83887	2.31982	4.52637
									136.74	2.2168	1.77637	1.86719	1.13672	1.43555			72.24	0.672852	0.821777	1.5708	2.38965			149.74	1.06006	1.36621	1.85058	2.31787	4.53808
									136.84	2.22266	1.7959	1.87891	1.13086	1.45508			72.34	0.666992	0.815918	1.56104	2.38379			149.84	1.06982	1.38184	1.85645	2.32178	4.5459
									136.94	2.21875	1.80371	1.88281	1.15039	1.46289			72.44	0.676758	0.821777	1.55518	2.39355			149.94	1.06982	1.38379	1.86621	2.32764	4.5459
									137.04	2.22461	1.80176	1.88086	1.17773	1.44922			72.54	0.682617	0.821777	1.56299	2.40137			150.04	1.06591	1.37988	1.87402	2.33349	4.55175
									137.14	2.21875	1.7998	1.89453	1.18359	1.46289			72.64	0.672852	0.812012	1.56299	2.3916			150.14	1.05713	1.37402	1.87207	2.31787	4.5459
									137.24	2.21875	1.79786	1.89844	1.19727	1.46289			72.74	0.672852	0.812012	1.5415	2.3916			150.24	1.06982	1.37011	1.88379	2.31396	4.55175
									137.34	2.20118	1.80567	1.88282	1.20801	1.45313			72.84	0.682617	0.812012	1.55127	2.38965			150.34	1.05225	1.35645	1.87598	2.29053	4.53613
									137.44	2.20117	1.79395	1.87695	1.19727	1.43555			72.94	0.672852	0.806152	1.54639	2.37988			150.44	1.06201	1.38184	1.88965	2.30811	4.55566
									137.54	2.20508	1.81153	1.88867	1.18945	1.45117			73.04	0.663086	0.812012	1.54346	2.38379			150.54	1.06592	1.38379	1.89746	2.3081	4.55566
									137.64	2.21875	1.8291	1.9082	1.20898	1.46484			73.14	0.666992	0.816895	1.54346	2.40332			150.64	1.06787	1.38965	1.89355	2.3042	4.56641
									137.74	2.18946	1.81739	1.89649	1.2207	1.43555			73.24	0.65918	0.810059	1.54346	2.39551			150.74	1.06396	1.37402	1.88769	2.28857	4.56738
									137.84	2.16993	1.81739	1.89258	1.20117	1.43555			73.34	0.658203	0.812988	1.53857	2.39453			150.84	1.06396	1.38379	1.89746	2.29248	4.56934
									137.94	2.14551	1.80176	1.87891	1.18359	1.43555			73.44	0.645508	0.802246	1.52588	2.38281			150.94	1.0542	1.38379	1.8916	2.29834	4.56934
									138.04	2.14258	1.81153	1.8711	1.17773	1.43555			73.54	0.651367	0.796387	1.52588	2.37988
									138.14	2.15234	1.8125	1.88867	1.18164	1.44727			73.64	0.655273	0.815918	1.5415	2.39355
									138.24	2.13672	1.81739	1.87696	1.19922	1.44727			73.74	0.657227	0.796387	1.52588	2.38965
									138.34	2.13868	1.81348	1.87305	1.21484	1.44727			73.84	0.649414	0.794434	1.53369	2.38965
									138.44	2.14258	1.81738	1.87891	1.20898	1.43457			73.94	0.640625	0.796387	1.52588	2.38965
									138.54	2.12696	1.81348	1.86231	1.2207	1.4043			74.04	0.647461	0.790527	1.52002	2.38574
									138.64	2.14648	1.82129	1.875	1.20508	1.42383			74.14	0.635742	0.790527	1.51416	2.37207
									138.74	2.13379	1.8125	1.86036	1.20703	1.4209			74.24	0.637695	0.790527	1.52588	2.38379
									138.84	2.15235	1.83887	1.87891	1.2002	1.43555			74.34	0.62207	0.780762	1.50635	2.36816
									138.94	2.14063	1.82715	1.86719	1.21289	1.42578			74.44	0.633789	0.79248	1.50635	2.37012
									139.04	2.13672	1.83497	1.86329	1.2207	1.42579			74.54	0.62793	0.786621	1.51611	2.37402
									139.14	2.11523	1.82324	1.8457	1.2168	1.42578			74.64	0.639648	0.808105	1.52783	2.38965
									139.24	2.10938	1.80958	1.83399	1.19141	1.40626			74.74	0.624023	0.780762	1.51709	2.37988
									139.34	2.11133	1.81739	1.83985	1.19141	1.41407			74.84	0.633789	0.791504	1.52979	2.37598
									139.44	2.10352	1.80566	1.83594	1.1875	1.40039			74.94	0.62207	0.796387	1.51221	2.36523
									139.54	2.11524	1.81153	1.84961	1.16211	1.40821			75.04	0.625977	0.806152	1.51611	2.38574
									139.64	2.12109	1.81738	1.84766	1.17383	1.41406			75.14	0.62793	0.808105	1.52783	2.3877
									139.74	2.1211	1.81739	1.84766	1.18359	1.39649			75.24	0.62207	0.79248	1.51611	2.38574
									139.84	2.13282	1.81348	1.86328	1.17969	1.41211			75.34	0.616211	0.79248	1.52588	2.38184
									139.94	2.12109	1.81543	1.8457	1.19141	1.40625			75.44	0.631836	0.796387	1.53174	2.38379
									140.04	2.11329	1.81153	1.8418	1.19434	1.39063			75.54	0.635742	0.802246	1.53174	2.38965
									140.14	2.12695	1.8252	1.85547	1.17188	1.41211			75.64	0.641602	0.806152	1.53564	2.39355
									140.24	2.13282	1.82325	1.85742	1.18945	1.41797			75.74	0.646484	0.811035	1.54053	2.39453
									140.34	2.14844	1.83692	1.86914	1.19727	1.42969			75.84	0.634766	0.805176	1.53467	2.39648
									140.44	2.14258	1.83301	1.86914	1.19141	1.42578			75.94	0.65332	0.822754	1.55225	2.40625
									140.54	2.13868	1.83106	1.87696	1.17969	1.42969			76.04	0.65332	0.825684	1.55127	2.41309
									140.64	2.14258	1.83691	1.88086	1.18359	1.43555			76.14	0.65332	0.831543	1.5415	2.41895
									140.74	2.13087	1.81348	1.86524	1.18164	1.42579			76.24	0.643555	0.820801	1.5415	2.40918
									140.84	2.12305	1.81153	1.86133	1.16602	1.41797			76.34	0.649414	0.817871	1.53564	2.41016
									140.94	2.12109	1.79395	1.84375	1.16211	1.40625			76.44	0.637695	0.806152	1.5249	2.41113
									141.04	2.13282	1.78809	1.84961	1.15625	1.42969			76.54	0.637695	0.808105	1.52783	2.40723
									141.14	2.12109	1.79199	1.84961	1.1582	1.42969			76.64	0.62207	0.806152	1.52588	2.39551
									141.24	2.1211	1.80567	1.85547	1.16211	1.43555			76.74	0.635742	0.812012	1.5415	2.41113
									141.34	2.1211	1.80957	1.85547	1.16406	1.43946			76.84	0.631836	0.802246	1.53564	2.41504
									141.44	2.11621	1.80176	1.85742	1.16211	1.43066			76.94	0.631836	0.802246	1.54736	2.41895
									141.54	2.10938	1.7959	1.85743	1.1543	1.42383			77.04	0.62207	0.802246	1.5415	2.41895
									141.64	2.125	1.78711	1.85645	1.14844	1.43164			77.14	0.62793	0.808105	1.5415	2.41895
									141.74	2.13477	1.78614	1.85547	1.15625	1.4336			77.24	0.625977	0.806152	1.5415	2.41895
									141.84	2.14063	1.80567	1.85547	1.1582	1.45703			77.34	0.631836	0.800293	1.53564	2.41309
									141.94	2.12891	1.79004	1.85547	1.16602	1.45313			77.44	0.629883	0.808105	1.53955	2.43066
									142.04	2.14063	1.792	1.84766	1.16016	1.45704			77.54	0.62793	0.796387	1.52588	2.4209
									142.14	2.14063	1.80566	1.85547	1.15625	1.46484			77.64	0.633789	0.802246	1.5415	2.43066
									142.24	2.15235	1.81739	1.86719	1.15039	1.47266			77.74	0.633789	0.802246	1.53174	2.4209
									142.34	2.16114	1.81055	1.86817	1.16211	1.45996			77.84	0.62207	0.79248	1.52197	2.4248
									142.44	2.15039	1.81738	1.85742	1.15527	1.46289			77.94	0.635742	0.806152	1.52588	2.43066
									142.54	2.1504	1.81348	1.85352	1.14648	1.44532			78.04	0.641602	0.816895	1.5415	2.43066
									142.64	2.1582	1.80762	1.84766	1.14063	1.46875			78.14	0.631836	0.813965	1.52197	2.43066
									142.74	2.14063	1.79981	1.84376	1.15234	1.45313			78.24	0.641602	0.812988	1.53174	2.42871
									142.84	2.14454	1.7959	1.85352	1.15234	1.43946			78.34	0.641602	0.812012	1.53174	2.42871
									142.94	2.1582	1.7959	1.85156	1.16406	1.44531			78.44	0.645508	0.804199	1.52197	2.43262
									143.04	2.16993	1.80762	1.84961	1.17773	1.44922			78.54	0.641602	0.810059	1.51416	2.42871
									143.14	2.16406	1.7959	1.83789	1.19727	1.44531			78.64	0.645508	0.819824	1.52002	2.42871
									143.24	2.20117	1.80371	1.84961	1.19531	1.45703			78.74	0.651367	0.810059	1.51025	2.42285
									143.34	2.20118	1.80176	1.84961	1.2207	1.46875			78.84	0.651367	0.813965	1.51416	2.42871
									143.44	2.20898	1.81543	1.875	1.21973	1.50195			78.94	0.645508	0.810059	1.51025	2.43262
									143.54	2.21289	1.81543	1.86914	1.23828	1.5			79.04	0.663086	0.825684	1.51611	2.44043
									143.64	2.20898	1.79785	1.86914	1.22656	1.48828			79.14	0.655273	0.821777	1.51611	2.43457
									143.74	2.21485	1.81348	1.88086	1.22852	1.50391			79.24	0.666992	0.821777	1.51807	2.44629
									143.84	2.21485	1.80371	1.86817	1.24023	1.50196			79.34	0.645508	0.812012	1.51611	2.43066
									143.94	2.2041	1.80566	1.86328	1.24023	1.51563			79.44	0.651367	0.815918	1.52588	2.44434
									144.04	2.20118	1.80957	1.86329	1.24805	1.52344			79.54	0.651367	0.812012	1.52002	2.43848
									144.14	2.21289	1.80859	1.86914	1.25977	1.50977			79.64	0.651367	0.825684	1.52393	2.45215
									144.24	2.21875	1.80371	1.88672	1.25977	1.52735			79.74	0.665039	0.82959	1.53467	2.45801
									144.34	2.22657	1.82325	1.89063	1.26758	1.51856			79.84	0.676758	0.830566	1.5376	2.45898
									144.44	2.24023	1.81348	1.89258	1.2793	1.51758			79.94	0.675781	0.835449	1.53174	2.45996
									144.54	2.22852	1.80762	1.87501	1.29883	1.51368			80.04	0.672852	0.841309	1.52588	2.46387
									144.64	2.23438	1.81152	1.86914	1.29883	1.50781			80.14	0.672852	0.831543	1.53564	2.45996
									144.74	2.22852	1.80176	1.86329	1.31055	1.50586			80.24	0.666992	0.825684	1.53174	2.4541
									144.84	2.22461	1.78418	1.85743	1.31055	1.50196			80.34	0.672852	0.821777	1.53564	2.45996
									144.94	2.21582	1.79297	1.84668	1.31445	1.5127			80.44	0.672852	0.815918	1.5415	2.45996
									145.04	2.21875	1.78418	1.83985	1.30566	1.51954			80.54	0.670898	0.835449	1.55518	2.46387
									145.14	2.2168	1.78223	1.82813	1.3125	1.52734			80.64	0.665039	0.82959	1.54932	2.46973
									145.24	2.21094	1.7959	1.81641	1.3125	1.53516			80.74	0.670898	0.819824	1.54932	2.46582
									145.34	2.21485	1.7959	1.81641	1.30078	1.55079			80.84	0.672852	0.821777	1.55127	2.46387
									145.44	2.21094	1.79395	1.82227	1.2998	1.55078			80.94	0.666992	0.825684	1.54541	2.45996
									145.54	2.21094	1.792	1.82325	1.30469	1.55664			81.04	0.668945	0.827637	1.55713	2.46582
									145.64	2.19141	1.77832	1.80859	1.30273	1.5332			81.14	0.661133	0.815918	1.54932	2.46777
									145.74	2.1836	1.78223	1.80079	1.28906	1.53126			81.24	0.65918	0.808105	1.55713	2.46582
									145.84	2.17969	1.78418	1.80274	1.27344	1.53711			81.34	0.657227	0.815918	1.55615	2.45996
									145.94	2.16797	1.77051	1.79688	1.27539	1.52539			81.44	0.655273	0.812012	1.56299	2.4541
									146.04	2.17383	1.76661	1.80079	1.26172	1.51954			81.54	0.647461	0.803223	1.54932	2.45605
									146.14	2.17578	1.76953	1.81055	1.25781	1.5332			81.64	0.646484	0.813965	1.55713	2.4541
									146.24	2.17383	1.75879	1.8086	1.25781	1.51954			81.74	0.639648	0.802246	1.54932	2.44629
									146.34	2.1836	1.76465	1.81446	1.25	1.53321			81.84	0.647461	0.812012	1.54736	2.44531
									146.44	2.16016	1.74316	1.80469	1.25	1.51563			81.94	0.643555	0.806152	1.55322	2.45215
									146.54	2.15235	1.72754	1.79688	1.23438	1.51563			82.04	0.643555	0.812012	1.55518	2.46582
									146.64	2.16406	1.73535	1.79688	1.2207	1.52637			82.14	0.647461	0.815918	1.55518	2.45996
									146.74	2.16993	1.74707	1.79688	1.22852	1.52539			82.24	0.65332	0.821777	1.5708	2.46387
									146.84	2.17774	1.73926	1.79688	1.22852	1.54102			82.34	0.652344	0.820801	1.56982	2.46484
									146.94	2.15625	1.73535	1.79688	1.23242	1.54688			82.44	0.639648	0.810059	1.56885	2.44824
									147.04	2.1504	1.73536	1.80079	1.2207	1.53125			82.54	0.633789	0.813965	1.57275	2.45215
									147.14	2.1543	1.75488	1.82227	1.2207	1.5293			82.64	0.641602	0.817871	1.58643	2.45996
									147.24	2.16016	1.75489	1.82422	1.22852	1.53125			82.74	0.641602	0.802246	1.57471	2.4502
									147.34	2.16504	1.77149	1.83692	1.2168	1.53028			82.84	0.645508	0.815918	1.59033	2.45996
									147.44	2.15234	1.7627	1.81836	1.2334	1.52148			82.94	0.645508	0.812012	1.59033	2.4541
									147.54	2.15918	1.76856	1.82617	1.22754	1.51953			83.04	0.651367	0.813965	1.59033	2.45996
									147.64	2.12891	1.75293	1.82813	1.2207	1.51172			83.14	0.641602	0.815918	1.60107	2.45605
									147.74	2.13282	1.75098	1.83496	1.2207	1.50977			83.24	0.631836	0.805176	1.59229	2.4541
									147.84	2.125	1.74317	1.83204	1.2168	1.51368			83.34	0.634766	0.825684	1.60596	2.46191
									147.94	2.13086	1.74512	1.8418	1.19922	1.51172			83.44	0.637695	0.827637	1.59814	2.4541
									148.04	2.13867	1.74707	1.84766	1.19922	1.51758			83.54	0.62207	0.812012	1.59229	2.44824
									148.14	2.12695	1.74316	1.83594	1.21875	1.50195			83.64	0.625977	0.815918	1.59229	2.44824
									148.24	2.1211	1.74121	1.82813	1.21484	1.50782			83.74	0.625977	0.812012	1.59619	2.44824
									148.34	2.1211	1.73731	1.82422	1.21289	1.50782			83.84	0.62793	0.821777	1.59814	2.44824
									148.44	2.125	1.73633	1.83008	1.2207	1.52734			83.94	0.62207	0.812012	1.60596	2.44824
									148.54	2.13086	1.74707	1.83594	1.23242	1.51563			84.04	0.625977	0.825684	1.61182	2.44824
									148.64	2.13086	1.74707	1.83594	1.2207	1.52734			84.14	0.629883	0.833496	1.61182	2.45117
									148.74	2.12696	1.75098	1.83594	1.2207	1.53907			84.24	0.614258	0.821777	1.61182	2.45215
									148.84	2.1211	1.74512	1.84375	1.22852	1.53028			84.34	0.612305	0.831543	1.61768	2.45215
									148.94	2.12109	1.74902	1.83789	1.22852	1.52734			84.44	0.612305	0.821777	1.60596	2.44629
									149.04	2.125	1.75684	1.8418	1.2207	1.54297			84.54	0.616211	0.821777	1.62158	2.46191
									149.14	2.13867	1.76465	1.85547	1.23633	1.54883			84.64	0.612305	0.821777	1.61768	2.44629
									149.24	2.13087	1.75684	1.84376	1.25	1.53516			84.74	0.62207	0.821777	1.61182	2.44434
									149.34	2.11915	1.73731	1.82618	1.24609	1.52735			84.84	0.625977	0.831543	1.62549	2.45996
									149.44	2.14258	1.76074	1.83789	1.2207	1.55078			84.94	0.631836	0.841309	1.63135	2.47363
									149.54	2.13086	1.76661	1.83789	1.23633	1.55664			85.04	0.636719	0.835449	1.63525	2.46973
									149.64	2.1543	1.78223	1.84961	1.23828	1.55664			85.14	0.624023	0.827637	1.62744	2.46973
									149.74	2.15625	1.78028	1.84375	1.25391	1.55274			85.24	0.62793	0.831543	1.63135	2.46973
									149.84	2.15821	1.78614	1.84571	1.25977	1.56055			85.34	0.62207	0.82666	1.61182	2.46387
									149.94	2.16211	1.77832	1.86133	1.26367	1.55859			85.44	0.635742	0.847168	1.61572	2.46973
									150.04	2.17383	1.79785	1.86133	1.26172	1.57032			85.54	0.636719	0.85791	1.62646	2.47461
									150.14	2.17188	1.79199	1.86328	1.27344	1.57227			85.64	0.619141	0.855957	1.61768	2.4668
									150.24	2.19922	1.80567	1.86524	1.27148	1.57422			85.74	0.617188	0.852051	1.6167	2.46484
									150.34	2.20313	1.80957	1.86914	1.29883	1.57813			85.84	0.616211	0.851074	1.61572	2.45801
									150.44	2.19922	1.80566	1.85742	1.29883	1.56641			85.94	0.631836	0.864746	1.62158	2.47266
									150.54	2.21094	1.81739	1.86914	1.28125	1.57813			86.04	0.631836	0.856934	1.61182	2.46582
									150.64	2.21094	1.81738	1.87305	1.28809	1.57422			86.14	0.631836	0.85498	1.61182	2.47363
									150.74	2.21485	1.83692	1.88184	1.28125	1.58203			86.24	0.62207	0.86084	1.60205	2.45996
									150.84	2.22071	1.8252	1.875	1.29883	1.57618			86.34	0.612305	0.851074	1.59229	2.46387
									150.94	2.22852	1.83691	1.88672	1.28711	1.57617			86.44	0.606445	0.851074	1.58643	2.46973
									151.04	2.24024	1.83301	1.88672	1.30664	1.58399			86.54	0.615234	0.864746	1.58447	2.47949
									151.14	2.24023	1.83496	1.89453	1.29883	1.57422			86.64	0.62207	0.870605	1.59033	2.4834
									151.24	2.24805	1.83496	1.89453	1.29492	1.58594			86.74	0.62207	0.856934	1.59033	2.47949
									151.34	2.25977	1.84668	1.90235	1.29688	1.58203			86.84	0.625977	0.864746	1.59424	2.49316
									151.44	2.25586	1.83496	1.88477	1.30859	1.56445			86.94	0.641602	0.871582	1.59619	2.49902
									151.54	2.26172	1.83496	1.89649	1.30469	1.55664			87.04	0.631836	0.876465	1.58447	2.48926
									151.64	2.25	1.8252	1.89258	1.29883	1.55176			87.14	0.631836	0.868652	1.59033	2.49023
									151.74	2.25	1.8252	1.88672	1.29492	1.53321			87.24	0.637695	0.866699	1.59229	2.49121
									151.84	2.25	1.8252	1.89453	1.28906	1.54492			87.34	0.629883	0.868652	1.57861	2.47754
									151.94	2.23535	1.83398	1.87988	1.28516	1.5498			87.44	0.633789	0.866699	1.57275	2.48145
									152.04	2.25684	1.84375	1.89356	1.26465	1.55957			87.54	0.62793	0.876465	1.56592	2.47559
									152.14	2.2666	1.84863	1.8916	1.28613	1.55176			87.64	0.633789	0.88623	1.58252	2.48535
									152.24	2.27344	1.84863	1.91016	1.28418	1.57031			87.74	0.643555	0.888184	1.57275	2.49707
									152.34	2.26953	1.84864	1.91407	1.30273	1.57813			87.84	0.641602	0.88623	1.57275	2.50488
									152.44	2.25195	1.84863	1.9082	1.29883	1.56641			87.94	0.630859	0.887207	1.56201	2.49609
									152.54	2.25196	1.83692	1.89649	1.28125	1.5625			88.04	0.620117	0.884277	1.55127	2.48926
									152.64	2.25195	1.84863	1.9043	1.28125	1.56836			88.14	0.629883	0.891113	1.55127	2.48926
									152.74	2.24805	1.85254	1.89844	1.29688	1.56055			88.24	0.629883	0.901855	1.55127	2.49316
									152.84	2.2461	1.84278	1.90235	1.2793	1.5625			88.34	0.634766	0.895996	1.54346	2.49902
									152.94	2.24414	1.84863	1.9043	1.28711	1.56836			88.44	0.651367	0.911621	1.55908	2.49902
									153.04	2.23926	1.85645	1.89844	1.29297	1.57617			88.54	0.637695	0.901855	1.54932	2.49512
									153.14	2.2207	1.86035	1.89844	1.30078	1.55273			88.64	0.633789	0.913574	1.55127	2.49316
									153.24	2.22071	1.87793	1.89844	1.30078	1.5586			88.74	0.62793	0.905762	1.54541	2.50293
									153.34	2.23242	1.87403	1.89453	1.3125	1.56641			88.84	0.639648	0.91748	1.54736	2.50488
									153.44	2.23242	1.87598	1.9082	1.31641	1.56641			88.94	0.62793	0.901855	1.54541	2.49316
									153.54	2.22461	1.87598	1.89649	1.31055	1.5586			89.04	0.643555	0.915527	1.55127	2.49902
									153.64	2.21484	1.87598	1.90039	1.32227	1.55078			89.14	0.631836	0.911621	1.53662	2.49902
									153.74	2.22071	1.87989	1.89844	1.31445	1.55664			89.24	0.637695	0.921387	1.54932	2.5
									153.84	2.20899	1.8877	1.89844	1.32031	1.55665			89.34	0.635742	0.921387	1.54541	2.51074
									153.94	2.19727	1.87598	1.88281	1.32031	1.54492			89.44	0.641602	0.925293	1.54541	2.51074
																	89.54	0.637695	0.927246	1.54736	2.50684
																	89.64	0.635742	0.915527	1.53564	2.49121
																	89.74	0.641602	0.931152	1.53174	2.49121
																	89.84	0.647461	0.931152	1.5415	2.49707
																	89.94	0.645508	0.940918	1.54541	2.50098
																	90.04	0.651367	0.931152	1.53174	2.49316
																	90.14	0.641602	0.924316	1.52393	2.48926
																	90.24	0.643555	0.942871	1.5415	2.49121
																	90.34	0.643555	0.937012	1.53564	2.49121
																	90.44	0.643555	0.942871	1.5376	2.49121
																	90.54	0.643555	0.942871	1.52588	2.49121
																	90.64	0.643555	0.942871	1.5415	2.49121
																	90.74	0.642578	0.928223	1.53174	2.49023
																	90.84	0.641602	0.921387	1.52197	2.47949
																	90.94	0.646484	0.915527	1.51611	2.47949
																	91.04	0.651367	0.925293	1.53174	2.4834
																	91.14	0.655273	0.921387	1.52197	2.48926
																	91.24	0.651367	0.921387	1.52588	2.47949
																	91.34	0.661133	0.921387	1.52588	2.47559
																	91.44	0.651367	0.913574	1.51025	2.46191
																	91.54	0.665039	0.919434	1.51416	2.47754
																	91.64	0.657227	0.905762	1.50635	2.46387
																	91.74	0.665039	0.913574	1.50439	2.46777
																	91.84	0.661133	0.909668	1.50049	2.45801
																	91.94	0.661133	0.899902	1.50049	2.44824
																	92.04	0.661133	0.909668	1.50439	2.46191
																	92.14	0.655273	0.904785	1.50049	2.46777
																	92.24	0.663086	0.919434	1.49658	2.47559
																	92.34	0.663086	0.907715	1.49463	2.46387
																	92.44	0.665039	0.913574	1.50439	2.46973
																	92.54	0.661133	0.91748	1.50049	2.45996
																	92.64	0.661133	0.921387	1.51514	2.47461
																	92.74	0.666016	0.921387	1.52197	2.48145
																	92.84	0.65918	0.907715	1.51221	2.46973
																	92.94	0.663086	0.915527	1.51221	2.47949
																	93.04	0.666992	0.911621	1.51611	2.47949
																	93.14	0.663086	0.911621	1.51221	2.47363
																	93.24	0.672852	0.915527	1.51221	2.47949
																	93.34	0.672852	0.927246	1.52197	2.48926
																	93.44	0.663086	0.911621	1.51221	2.47949
																	93.54	0.666992	0.915527	1.50049	2.46973
																	93.64	0.663086	0.91748	1.50049	2.46973
																	93.74	0.645508	0.911621	1.49463	2.46973
																	93.84	0.663086	0.91748	1.51221	2.47559
																	93.94	0.657227	0.911621	1.50635	2.47168
																	94.04	0.65918	0.91748	1.52197	2.48145
																	94.14	0.657227	0.925293	1.52197	2.4834
																	94.24	0.65332	0.92627	1.51221	2.48926
																	94.34	0.670898	0.937012	1.521	2.49805
																	94.44	0.682617	0.952637	1.54346	2.51074
																	94.54	0.682617	0.946777	1.53369	2.51465
																	94.64	0.682617	0.952637	1.54346	2.5166
																	94.74	0.672852	0.942871	1.53174	2.51465
																	94.84	0.665039	0.942871	1.53174	2.51074
																	94.94	0.676758	0.94873	1.5376	2.52051
																	95.04	0.666016	0.937012	1.52197	2.51465
																	95.14	0.676758	0.933105	1.51611	2.51074
																	95.24	0.672852	0.937012	1.52197	2.50488
																	95.34	0.663086	0.933105	1.52588	2.50098
																	95.44	0.676758	0.935059	1.53174	2.50293
																	95.54	0.672852	0.940918	1.52197	2.50879
																	95.64	0.666992	0.931152	1.51611	2.5127
																	95.74	0.667969	0.930176	1.51709	2.50391
																	95.84	0.655273	0.919434	1.51025	2.49707
																	95.94	0.661133	0.919434	1.50439	2.49121
																	96.04	0.655273	0.92334	1.51025	2.49707
																	96.14	0.65918	0.929199	1.52002	2.50195
																	96.24	0.645508	0.929199	1.50635	2.49512
																	96.34	0.643555	0.919434	1.50049	2.49316
																	96.44	0.651367	0.936035	1.50439	2.50098
																	96.54	0.647461	0.929199	1.50635	2.49121
																	96.64	0.631836	0.927246	1.49463	2.48145
																	96.74	0.645508	0.942871	1.51025	2.49512
																	96.84	0.637695	0.938965	1.50635	2.48535
																	96.94	0.631836	0.92334	1.49463	2.4834
																	97.04	0.626953	0.91748	1.50049	2.48926
																	97.14	0.633789	0.92334	1.50049	2.4834
																	97.24	0.629883	0.921387	1.49658	2.48535
																	97.34	0.62793	0.911621	1.48096	2.47949
																	97.44	0.624023	0.925293	1.48584	2.47363
																	97.54	0.62207	0.931152	1.48877	2.47559
																	97.64	0.616211	0.911621	1.47314	2.4541
																	97.74	0.618164	0.901855	1.46924	2.45605
																	97.84	0.612305	0.89209	1.46729	2.44043
																	97.94	0.612305	0.882324	1.46338	2.44531
																	98.04	0.602539	0.882324	1.46338	2.43848
																	98.14	0.602539	0.862793	1.45361	2.4209
																	98.24	0.602539	0.877441	1.46729	2.4248
																	98.34	0.592773	0.872559	1.46338	2.43066
																	98.44	0.59668	0.866699	1.46338	2.41113
																	98.54	0.583008	0.856934	1.44189	2.40527
																	98.64	0.583008	0.856934	1.44189	2.40137
																	98.74	0.572266	0.85791	1.43115	2.39063
																	98.84	0.575195	0.845215	1.43018	2.38965
																	98.94	0.581055	0.85498	1.44385	2.39941
																	99.04	0.577148	0.851074	1.43604	2.38965
																	99.14	0.566406	0.841309	1.43018	2.37988
																	99.24	0.573242	0.841309	1.42041	2.37988
																	99.34	0.55957	0.831543	1.40674	2.37988
																	99.44	0.545898	0.836426	1.40479	2.37012
																	99.54	0.551758	0.831543	1.40088	2.3623
																	99.64	0.551758	0.831543	1.40088	2.36816
																	99.74	0.545898	0.825684	1.40479	2.3584
																	99.84	0.541992	0.831543	1.40088	2.3584
																	99.94	0.532227	0.821777	1.39697	2.34473
																	100.04	0.52832	0.817871	1.39209	2.33887
																	100.14	0.516602	0.802246	1.3833	2.3291
																	100.24	0.512695	0.796387	1.38721	2.3291
																	100.34	0.508789	0.79834	1.38916	2.31543
																	100.44	0.50293	0.796387	1.38525	2.31934
																	100.54	0.49707	0.806152	1.38135	2.31445
																	100.64	0.50293	0.802246	1.38525	2.32129
																	100.74	0.491211	0.79834	1.37744	2.30762
																	100.84	0.491211	0.786621	1.36182	2.29199
																	100.94	0.491211	0.806152	1.36572	2.30566
																	101.04	0.485352	0.800293	1.37158	2.2998
																	101.14	0.481445	0.790527	1.36572	2.29395
																	101.24	0.477539	0.790527	1.36768	2.30566
																	101.34	0.461914	0.780762	1.36572	2.29004
																	101.44	0.46582	0.785645	1.36182	2.29004
																	101.54	0.466797	0.787598	1.37061	2.28906
																	101.64	0.461914	0.782715	1.36963	2.2998
																	101.74	0.466797	0.776855	1.37451	2.29395
																	101.84	0.458008	0.769043	1.36768	2.2959
																	101.94	0.456055	0.776855	1.36182	2.2998
																	102.04	0.461914	0.784668	1.36572	2.2998
																	102.14	0.461914	0.780762	1.36182	2.2998
																	102.24	0.461914	0.780762	1.37158	2.2998
																	102.34	0.461914	0.770996	1.36182	2.29004
																	102.44	0.456055	0.765137	1.35596	2.29004
																	102.54	0.47168	0.770996	1.37158	2.28809
																	102.64	0.461914	0.774902	1.36572	2.29199
																	102.74	0.458008	0.776855	1.35791	2.28418
																	102.84	0.442383	0.765137	1.35596	2.28223
																	102.94	0.446289	0.780762	1.36377	2.28809
																	103.04	0.452148	0.770996	1.35986	2.28809
																	103.14	0.438477	0.76709	1.35986	2.27832
																	103.24	0.430664	0.766113	1.35986	2.27832
																	103.34	0.43457	0.772949	1.35986	2.27832
																	103.44	0.436523	0.76709	1.35986	2.28906
																	103.54	0.420898	0.765137	1.3501	2.28027
																	103.64	0.422852	0.782715	1.36182	2.29199
																	103.74	0.416992	0.772949	1.35693	2.2959
																	103.84	0.432617	0.782715	1.36377	2.30176
																	103.94	0.422852	0.772949	1.36768	2.30176
																	104.04	0.436523	0.776855	1.37354	2.30176
																	104.14	0.432617	0.772949	1.37744	2.29199
																	104.24	0.438477	0.778809	1.37744	2.29004
																	104.34	0.422852	0.76709	1.37158	2.29004
																	104.44	0.433594	0.769043	1.36768	2.2959
																	104.54	0.43457	0.76709	1.36572	2.28418
																	104.64	0.422852	0.759277	1.35791	2.27637
																	104.74	0.432617	0.751465	1.35205	2.28027
																	104.84	0.432617	0.751465	1.36572	2.29395
																	104.94	0.436523	0.751465	1.36182	2.29004
																	105.04	0.442383	0.76123	1.36572	2.2998
																	105.14	0.452148	0.765137	1.38135	2.2998
																	105.24	0.441406	0.756348	1.3667	2.28516
																	105.34	0.44043	0.753418	1.3501	2.28223
																	105.44	0.448242	0.757324	1.3501	2.28613
																	105.54	0.436523	0.751465	1.3501	2.27441
																	105.64	0.442383	0.755371	1.35986	2.29004
																	105.74	0.446289	0.751465	1.3501	2.29004
																	105.84	0.448242	0.757324	1.35986	2.28418
																	105.94	0.442383	0.741699	1.35986	2.28223
																	106.04	0.446289	0.744629	1.35986	2.28809
																	106.14	0.452148	0.751465	1.35498	2.29297
																	106.24	0.454102	0.751465	1.37158	2.2998
																	106.34	0.459961	0.76123	1.38135	2.31348
																	106.44	0.464844	0.755371	1.37549	2.30957
																	106.54	0.477539	0.76709	1.37744	2.30566
																	106.64	0.47168	0.755371	1.37158	2.29395
																	106.74	0.47168	0.770996	1.37158	2.30957
																	106.84	0.483398	0.776855	1.37744	2.31152
																	106.94	0.483398	0.79248	1.39307	2.31152
																	107.04	0.467773	0.772949	1.38721	2.29395
																	107.14	0.483398	0.786621	1.39307	2.31348
																	107.24	0.473633	0.788574	1.37744	2.30566
																	107.34	0.487305	0.796387	1.38525	2.30957
																	107.44	0.483398	0.79248	1.39111	2.2998
																	107.54	0.483398	0.79248	1.40479	2.30371
																	107.64	0.483398	0.782715	1.40088	2.30957
																	107.74	0.469727	0.770996	1.39697	2.2959
																	107.84	0.473633	0.780762	1.39502	2.29395
																	107.94	0.475586	0.784668	1.40088	2.30957
																	108.04	0.481445	0.790527	1.40088	2.30371
																	108.14	0.477539	0.786621	1.40674	2.31543
																	108.24	0.485352	0.784668	1.40088	2.30957
																	108.34	0.481445	0.780762	1.40479	2.30469
																	108.44	0.489258	0.783691	1.40869	2.30762
																	108.54	0.483398	0.794434	1.4126	2.31152
																	108.64	0.482422	0.783691	1.39795	2.30078
																	108.74	0.491211	0.782715	1.396	2.30957
																	108.84	0.481445	0.786621	1.40283	2.2998
																	108.94	0.495117	0.802246	1.40088	2.2998
																	109.04	0.500977	0.790527	1.40479	2.30957
																	109.14	0.500977	0.780762	1.41064	2.2998
																	109.24	0.487305	0.770996	1.40088	2.2959
																	109.34	0.485352	0.774902	1.40088	2.28418
																	109.44	0.487305	0.786621	1.39697	2.2959
																	109.54	0.491211	0.780762	1.40479	2.29395
																	109.64	0.491211	0.774902	1.40088	2.29004
																	109.74	0.485352	0.786621	1.39697	2.2998
																	109.84	0.469727	0.76123	1.39502	2.28809
																	109.94	0.474609	0.770996	1.41064	2.29199
																	110.04	0.481445	0.763184	1.40088	2.29785
																	110.14	0.493164	0.774902	1.40283	2.30957
																	110.24	0.489258	0.776855	1.4126	2.31934
																	110.34	0.487305	0.775879	1.41064	2.30957
																	110.44	0.493164	0.782715	1.41455	2.31348
																	110.54	0.483398	0.776855	1.41064	2.30957
																	110.64	0.479492	0.778809	1.41064	2.30566
																	110.74	0.477539	0.772949	1.41064	2.30371
																	110.84	0.483398	0.776855	1.41064	2.30957
																	110.94	0.489258	0.782715	1.4165	2.31543
																	111.04	0.481445	0.782715	1.41064	2.31445
																	111.14	0.481445	0.786621	1.40479	2.30957
																	111.24	0.485352	0.790527	1.42041	2.31934
																	111.34	0.493164	0.796387	1.42236	2.3252
																	111.44	0.489258	0.788574	1.42334	2.31738
																	111.54	0.473633	0.786621	1.41455	2.31152
																	111.64	0.483398	0.79248	1.42432	2.31543
																	111.74	0.46875	0.781738	1.41943	2.30664
																	111.84	0.47168	0.780762	1.4165	2.30957
																	111.94	0.46582	0.775879	1.42236	2.30957
																	112.04	0.477539	0.788574	1.42822	2.30957
																	112.14	0.47168	0.782715	1.42041	2.30957
																	112.24	0.47168	0.796387	1.43408	2.31348
																	112.34	0.477539	0.796387	1.43604	2.31543
																	112.44	0.47168	0.784668	1.42041	2.31348
																	112.54	0.47168	0.800293	1.43408	2.31738
																	112.64	0.463867	0.790527	1.43018	2.32129
																	112.74	0.477539	0.79248	1.44189	2.3252
																	112.84	0.47168	0.79248	1.43213	2.30957
																	112.94	0.47168	0.79248	1.43799	2.31934
																	113.04	0.481445	0.802246	1.43604	2.31934
																	113.14	0.477539	0.79834	1.43799	2.3252
																	113.24	0.47168	0.796387	1.44189	2.33398
																	113.34	0.47168	0.79248	1.43213	2.33105
																	113.44	0.475586	0.790527	1.44189	2.33496
																	113.54	0.487305	0.796387	1.43994	2.33691
																	113.64	0.47168	0.784668	1.43018	2.33496
																	113.74	0.467773	0.786621	1.43604	2.34668
																	113.84	0.476563	0.780762	1.43018	2.34082
																	113.94	0.473633	0.780762	1.42432	2.3291
																	114.04	0.469727	0.778809	1.43799	2.34082
																	114.14	0.463867	0.763184	1.42236	2.33105
																	114.24	0.477539	0.76709	1.43213	2.34473
																	114.34	0.473633	0.763184	1.42725	2.34082
																	114.44	0.478516	0.758301	1.43896	2.34961
																	114.54	0.480469	0.766113	1.43701	2.35352
																	114.64	0.493164	0.774902	1.44385	2.37012
																	114.74	0.478516	0.766113	1.44287	2.35938
																	114.84	0.475586	0.76416	1.43018	2.3584
																	114.94	0.477539	0.776855	1.43604	2.3584
																	115.04	0.475586	0.770996	1.43994	2.37305
																	115.14	0.473633	0.76123	1.42627	2.36621
																	115.24	0.469727	0.774902	1.42432	2.36426
																	115.34	0.493164	0.79248	1.44189	2.37012
																	115.44	0.477539	0.782715	1.44189	2.36035
																	115.54	0.485352	0.782715	1.45166	2.37012
																	115.64	0.481445	0.782715	1.44189	2.36035
																	115.74	0.477539	0.778809	1.44775	2.36621
																	115.84	0.46582	0.76709	1.44971	2.35449
																	115.94	0.481445	0.778809	1.46729	2.35645
																	116.04	0.481445	0.776855	1.45166	2.35449
																	116.14	0.487305	0.776855	1.45752	2.35645
																	116.24	0.485352	0.784668	1.45557	2.35059
																	116.34	0.481445	0.780762	1.46143	2.35059
																	116.44	0.491211	0.790527	1.46143	2.35059
																	116.54	0.487305	0.790527	1.46729	2.35645
																	116.64	0.481445	0.780762	1.45557	2.34473
																	116.74	0.47168	0.780762	1.46143	2.35059
																	116.84	0.478516	0.782715	1.46338	2.3623
																	116.94	0.481445	0.778809	1.44775	2.34668
																	117.04	0.489258	0.772949	1.45557	2.35449
																	117.14	0.483398	0.757324	1.45166	2.35059
																	117.24	0.489258	0.769043	1.45166	2.36035
																	117.34	0.487305	0.751465	1.45166	2.36035
																	117.44	0.493164	0.765137	1.46631	2.36426
																	117.54	0.483398	0.770996	1.46338	2.37012
																	117.64	0.487305	0.770996	1.46338	2.36035
																	117.74	0.483398	0.770996	1.45361	2.35059
																	117.84	0.49707	0.775879	1.46338	2.36035
																	117.94	0.50293	0.802246	1.47314	2.36035
																	118.04	0.498047	0.797363	1.4585	2.3457
																	118.14	0.491211	0.804199	1.46143	2.34863
																	118.24	0.495117	0.800293	1.46143	2.33887
																	118.34	0.496094	0.818848	1.49561	2.35352
																	118.44	0.512695	0.831543	1.50635	2.3584
																	118.54	0.538086	0.856934	1.53369	2.37012
																	118.64	0.541992	0.862793	1.54736	2.37988
																	118.74	0.535156	0.834473	1.51123	2.35742
																	118.84	0.52832	0.821777	1.48486	2.34473
																	118.94	0.508789	0.802246	1.48096	2.3291
																	119.04	0.540039	0.790527	1.48486	2.33887
																	119.14	0.56543	0.813965	1.51025	2.3584
																	119.24	0.549805	0.804199	1.51025	2.35254
																	119.34	0.416992	0.671387	1.39893	2.24512
																	119.44	0.521484	0.790527	1.4751	2.3584
																	119.54	0.594727	0.812988	1.42236	2.37793
																	119.64	0.737305	0.92627	1.48096	2.50195
																	119.74	0.512207	0.727051	1.0498	2.34668
																	119.84	0.787598	0.745605	1.57178	2.51953
																	120.84	1.30469	1.88281	1.58008	1
																	120.94	1.07471	1.42334	1.27393	1.23047
																	121.04	0.996582	1.09521	1.30127	1.22998
																	121.14	0.745117	1.25439	1.23193	1.04199
																	121.24	0.75	1.28613	1.10107	1.22852
																	121.34	0.68457	1.4502	1.21338	1.31934
																	121.44	0.660645	1.229	1.03809	1.02734
																	121.54	0.819336	1.01709	1.39307	1.10986
																	121.64	0.952637	1.34131	1.39063	1.18311
																	121.74	0.875	1.5083	1.30518	1.25244
																	121.84	0.858398	1.41016	1.21338	1.23438
																	121.94	0.830566	1.41406	1.0791	1.19287
																	122.04	0.749023	1.35303	1.0083	1.1626
																	122.14	0.710449	1.26123	0.979004	1.12744
																	122.24	0.662598	1.2876	0.981934	1.16016
																	122.34	0.685547	1.271	0.965332	1.18945
																	122.44	0.71875	1.27832	0.964355	1.18457
																	122.54	0.770508	1.42725	0.978027	1.25781
																	122.64	0.806152	1.5	0.975586	1.28027
																	122.74	0.833008	1.43066	1.00977	1.24512
																	122.84	0.919434	1.46436	1.08447	1.26465
																	122.94	0.925293	1.45313	1.09277	1.25146
																	123.04	0.969727	1.47998	1.11377	1.2627
																	123.14	0.973633	1.47021	1.14355	1.25293
																	123.24	0.926758	1.43945	1.14111	1.23975
																	123.34	0.94043	1.44873	1.1665	1.22461
																	123.44	0.936523	1.43506	1.12549	1.19629
																	123.54	0.944336	1.43896	1.11377	1.1748
																	123.64	0.97168	1.47656	1.14697	1.18848
																	123.74	0.953125	1.4917	1.15771	1.20703
																	123.84	0.935547	1.47217	1.1333	1.20703
																	123.94	0.915039	1.47607	1.1333	1.22949
																	124.04	0.897461	1.48682	1.14111	1.23047
																	124.14	0.905273	1.47314	1.14307	1.22656
																	124.24	0.921875	1.45557	1.13525	1.19922
																	124.34	0.90625	1.46338	1.14307	1.22461
																	124.44	0.90625	1.43799	1.14697	1.2207
																	124.54	0.921875	1.43604	1.17236	1.23047
																	124.64	0.920898	1.45166	1.19189	1.23535
																	124.74	0.929688	1.44678	1.18018	1.23047
																	124.84	0.964844	1.46338	1.19971	1.26367
																	124.94	0.998047	1.50244	1.22705	1.29004
																	125.04	0.983398	1.48779	1.20752	1.28906
																	125.14	0.987305	1.47021	1.20557	1.28418
																	125.24	0.984375	1.48486	1.21924	1.30273
																	125.34	0.976563	1.47705	1.22705	1.29492
																	125.44	0.958008	1.46826	1.22705	1.28613
																	125.54	0.941406	1.45361	1.21143	1.2793
																	125.64	0.93457	1.46338	1.21533	1.28223
																	125.74	0.947266	1.46436	1.21729	1.2793
																	125.84	0.936523	1.46045	1.20361	1.27051
																	125.94	0.950195	1.47412	1.20947	1.27051
																	126.04	0.973633	1.48291	1.23389	1.27832
																	126.14	0.96582	1.47119	1.22217	1.25977
																	126.24	0.977539	1.47217	1.21729	1.2666
																	126.34	0.987305	1.47607	1.21143	1.26074
																	126.44	0.989258	1.48193	1.22314	1.26074
																	126.54	0.993164	1.4917	1.22119	1.25977
																	126.64	0.976563	1.48291	1.21143	1.25879
																	126.74	0.987305	1.48389	1.21143	1.27051
																	126.84	0.984375	1.46533	1.20361	1.26953
																	126.94	0.979492	1.47021	1.20947	1.26855
																	127.04	0.989258	1.47021	1.20947	1.27344
																	127.14	0.990234	1.47021	1.20947	1.29004
																	127.24	0.991211	1.47021	1.20947	1.29004
																	127.34	0.991211	1.47119	1.21338	1.29004
																	127.44	1.00293	1.48584	1.22021	1.29004
																	127.54	0.993164	1.48193	1.20752	1.27051
																	127.64	0.992188	1.47119	1.19092	1.26953
																	127.74	0.961914	1.45654	1.17627	1.26953
																	127.84	0.958008	1.45459	1.17432	1.27441
																	127.94	0.956055	1.45068	1.17041	1.27051
																	128.04	0.955078	1.45557	1.17041	1.28027
																	128.14	0.948242	1.45654	1.17041	1.27051
																	128.24	0.954102	1.4585	1.17041	1.28027
																	128.34	0.948242	1.44678	1.16943	1.27441
																	128.44	0.944336	1.45264	1.15869	1.2666
																	128.54	0.944336	1.44287	1.1626	1.26074
																	128.64	0.933594	1.43799	1.14795	1.25977
																	128.74	0.93457	1.42334	1.1333	1.24707
																	128.84	0.936523	1.4292	1.13916	1.25684
																	128.94	0.924805	1.42334	1.14111	1.24707
																	129.04	0.930664	1.42432	1.13525	1.24219
																	129.14	0.93457	1.44092	1.14502	1.25879
																	129.24	0.932617	1.43115	1.14111	1.24902
																	129.34	0.911133	1.42139	1.14111	1.24316
																	129.44	0.911133	1.41162	1.12158	1.24902
																	129.54	0.911133	1.42139	1.13135	1.24902
																	129.64	0.907227	1.41162	1.12158	1.23926
																	129.74	0.902344	1.41162	1.11768	1.23926
																	129.84	0.893555	1.41553	1.1167	1.24121
																	129.94	0.897461	1.41162	1.12354	1.24512
																	130.04	0.899414	1.41162	1.11377	1.24707
																	130.14	0.885742	1.40381	1.11572	1.2334
																	130.24	0.891602	1.3999	1.11182	1.22949
																	130.34	0.885742	1.40674	1.10596	1.22949
																	130.44	0.899414	1.40967	1.11768	1.22559
																	130.54	0.887695	1.39404	1.10596	1.22461
																	130.64	0.879883	1.38428	1.10791	1.21777
																	130.74	0.874023	1.38428	1.09229	1.21582
																	130.84	0.87793	1.37451	1.09619	1.21191
																	130.94	0.874023	1.37842	1.09619	1.21582
																	131.04	0.867188	1.37744	1.09521	1.20508
																	131.14	0.860352	1.37451	1.09229	1.20801
																	131.24	0.870117	1.37646	1.09619	1.2041
																	131.34	0.860352	1.36084	1.08057	1.2041
																	131.44	0.870117	1.37451	1.09521	1.21387
																	131.54	0.870117	1.37061	1.10205	1.20996
																	131.64	0.870117	1.37061	1.08838	1.2002
																	131.74	0.860352	1.37061	1.08252	1.2002
																	131.84	0.858398	1.35693	1.06885	1.18652
																	131.94	0.857422	1.35303	1.06299	1.18066
																	132.04	0.852539	1.34521	1.05518	1.18262
																	132.14	0.866211	1.36084	1.0708	1.19824
																	132.24	0.868164	1.34717	1.06689	1.18457
																	132.34	0.862305	1.34131	1.06494	1.17871
																	132.44	0.852539	1.34131	1.0708	1.17285
																	132.54	0.848633	1.33154	1.06885	1.1748
																	132.64	0.856445	1.35107	1.07275	1.16895
																	132.74	0.852539	1.34131	1.07275	1.16895
																	132.84	0.856445	1.33154	1.07275	1.16406
																	132.94	0.864258	1.33154	1.07275	1.1709
																	133.04	0.864258	1.33154	1.07666	1.16113
																	133.14	0.860352	1.3374	1.08838	1.16895
																	133.24	0.852539	1.33154	1.0708	1.16113
																	133.34	0.852539	1.33154	1.0708	1.15527
																	133.44	0.84668	1.33643	1.07666	1.15137
																	133.54	0.852539	1.34326	1.07275	1.15527
																	133.64	0.852539	1.34326	1.08252	1.15137
																	133.74	0.856445	1.34326	1.07275	1.1416
																	133.84	0.87207	1.35303	1.08252	1.15527
																	133.94	0.870117	1.34326	1.07861	1.15723
																	134.04	0.868164	1.34717	1.08057	1.15527
																	134.14	0.858398	1.3374	1.08643	1.15527
																	134.24	0.856445	1.3335	1.0708	1.15332
																	134.34	0.875977	1.3335	1.08447	1.1709
																	134.44	0.881836	1.3335	1.09229	1.16113
																	134.54	0.876953	1.32861	1.07764	1.15625
																	134.64	0.870117	1.32178	1.0708	1.15332
																	134.74	0.875	1.32178	1.06104	1.15918
																	134.84	0.868164	1.30811	1.05713	1.15527
																	134.94	0.862305	1.30615	1.05127	1.14941
																	135.04	0.866211	1.31982	1.04932	1.14746
																	135.14	0.858398	1.31787	1.03955	1.13379
																	135.24	0.852539	1.30225	1.03955	1.12793
																	135.34	0.852539	1.30225	1.04932	1.13379
																	135.44	0.852539	1.30225	1.03955	1.13965
																	135.54	0.852539	1.31201	1.03955	1.13965
																	135.64	0.838867	1.31201	1.0376	1.12598
																	135.74	0.836914	1.30811	1.03174	1.12012
																	135.84	0.842773	1.30225	1.03662	1.12012
																	135.94	0.84082	1.29443	1.0415	1.12793
																	136.04	0.842773	1.30029	1.0415	1.13184
																	136.14	0.838867	1.30225	1.0415	1.12793
																	136.24	0.829102	1.29834	1.03271	1.12402
																	136.34	0.823242	1.28662	1.0249	1.1084
																	136.44	0.827148	1.29248	1.03369	1.12012
																	136.54	0.833008	1.29248	1.03369	1.12012
																	136.64	0.821289	1.271	1.01221	1.1084
																	136.74	0.817383	1.28076	1.02197	1.11035
																	136.84	0.811523	1.28076	1.03174	1.09863
																	136.94	0.801758	1.28076	1.01807	1.09863
																	137.04	0.793945	1.26123	1.00244	1.08887
																	137.14	0.78418	1.26514	1.00244	1.09082
																	137.24	0.793945	1.28271	1.01221	1.10059
																	137.34	0.793945	1.28271	1.01416	1.10059
																	137.44	0.793945	1.28271	1.0083	1.10059
																	137.54	0.791992	1.271	1.02197	1.09863
																	137.64	0.791992	1.26123	1.01221	1.09863
																	137.74	0.801758	1.28076	1.02197	1.1084
																	137.84	0.801758	1.2749	1.02197	1.1084
																	137.94	0.797852	1.27686	1.01807	1.10645
																	138.04	0.797852	1.25732	1.01221	1.10059
																	138.14	0.803711	1.25537	1.01221	1.10059
																	138.24	0.799805	1.25732	1.0083	1.09277
																	138.34	0.78418	1.2417	1.00439	1.08105
																	138.44	0.78418	1.24365	1.00439	1.09082
																	138.54	0.793945	1.25342	1.01416	1.10059
																	138.64	0.782227	1.2417	1.00244	1.08887
																	138.74	0.767578	1.23682	0.987793	1.08594
																	138.84	0.770508	1.22998	0.984863	1.0791
																	138.94	0.760742	1.22998	0.990723	1.0791
																	139.04	0.772461	1.23975	1.00049	1.08301
																	139.14	0.782227	1.23975	1.00049	1.09863
																	139.24	0.782227	1.23975	1.00244	1.09863
																	139.34	0.791992	1.22998	1.00244	1.09473
																	139.44	0.799805	1.22607	0.996582	1.08301
																	139.54	0.797852	1.22021	0.990723	1.0791
																	139.64	0.801758	1.22021	0.990723	1.0791
																	139.74	0.805664	1.22021	0.990723	1.0791
																	139.84	0.811523	1.22998	1.00049	1.09863
																	139.94	0.807617	1.20654	0.986816	1.08496
																	140.04	0.797852	1.20068	0.98291	1.0791
																	140.14	0.801758	1.21045	0.98291	1.08887
																	140.24	0.776367	1.19482	0.95752	1.0752
																	140.34	0.78418	1.20459	0.955566	1.09277
																	140.44	0.797852	1.20654	0.95752	1.08496
																	140.54	0.795898	1.20459	0.941895	1.08301
[truncated: 149 more rows]

## Sheet: Figure2
Figure2 A
	H1975	H1975				H1975+PD1/PD-L1 inhibitor 1				H1975+Nivolumab				H1975+T cell				H1975+T cell+PD1/PD-L1 inhibitor 1				H1975+T cell+Nivolumab
		1.84	2.05	1.95	1.86	2.36	2.48	2.08	3.06	2.92	1.83	1.82	2.01	27.1	23.7	25	30.5	50.7	30.6	32	34.1	41.4	45.8	50.2	44.6
	A549	A549				A549+PD1/PD-L1 inhibitor 1				A549+Nivolumab				A549+T cell				A549+T cell+PD1/PD-L1 inhibitor 1				A549+T cell+Nivolumab
		2.87	2.72	2.57	1.77	2.52	3.71	2.39	2.89	3.52	1.8	2.14	1.56	7.32	4.13	5.59	3.96	10.3	8.45	8.4	8.41	8.68	6.73	7.32	4.13
Figure2 B
	A375	A375				A375+PD1/PD-L1 inhibitor1				A375+Nivolumab				A375+T cell				A375+T cell+PD1/PD-L1 inhibitor				A375+T cell+Nivolumab
		4.35	5.72	3.97	4.31	6.03	7.3	6.76	5.9	5.6	6.08	5.76	5.27	19.4	20.9	19.5	17.2	38.2	35.9	38	36.3	29.5	30.5	27	20.6
	SK-MEL-2	SK-MEL-2				SK-MEL-2+PD1/PD-L1 inhibitor1				SK-MEL-2+Nivolumab				SK-MEL-2+T cell				SK-MEL-2+T cell+PD1/PD-L1 inhibitor 1				SK-MEL-2+T cell+Nivolumab
		5.4	6.46	7.33	6.88	6.69	6.23	5.28	6.4	4.19	4.82	5.97	5.16	21.2	21.5	18.5	16.9	32.9	32.9	33.8	31.5	22.5	20.9	20.5	20.1
Figure2 C
	H1975	IFN-r
			H1975				H1975+PD1/PD-L1 inhibitor 1				H1975+Nivolumab				H1975+T cell				H1975+T cell+PD1/PD-L1 inhibitor 1				H1975+T cell+Nivolumab
			65.6129	72.0968	40.8387	51.2903	104.468	132.774	70.5	40.6936	55.1129	86.7097	81.7742	104.806	1711.98	1787.37	1830.68	1762.64	2425.68	2415.93	2404.39	2398.9	2384.64	2361.61	2415.42	2437.93
		TNF-a
			H1975				H1975+PD1/PD-L1 inhibitor 1				H1975+Nivolumab				H1975+T cell				H1975+T cell+PD1/PD-L1 inhibitor 1				H1975+T cell+Nivolumab
			345.429	158.143	250.714	112.286	106.714	121.714		324.214	214.286	199.929	142.071	124.286		304.286	265.286	385.071	549.571	496.714	423.857	428.143	509.571	464.143	528.714	608.714
		GranzymeB
			H1975				H1975+PD1/PD-L1 inhibitor 1				H1975+Nivolumab				H1975+T cell				H1975+T cell+PD1/PD-L1 inhibitor 1				H1975+T cell+Nivolumab
			283.618	159.912	115.088	183.735	146.323	264.647	222.647	84.3824	95.5	83.9412	125.059	103.706	3391.09	3397.44	3309.82	3319.88	4510.94	4509.18	4507.88			4559.77	4468.35	4620.35
		Perforin
			H1975				H1975+PD1/PD-L1 inhibitor 1				H1975+Nivolumab				H1975+T cell				H1975+T cell+PD1/PD-L1 inhibitor 1				H1975+T cell+Nivolumab
			218.583	235.833	203.083	206.333	233.083	278.583	263.583	216.333	224.583	196.583	208.333	211.083	3177.58	3095.58	2861.83	2707.33	4027.67	3964	3596.67	4214.33	4552.67	4557.33	4491.33	4480
	A549	IFN-r
			A549				A549+PD1/PD-L1 inhibitor 1				A549+Nivolumab				A549+T cell				A549+T cell+PD1/PD-L1 inhibitor 1				A549+T cell+Nivolumab
			257.2	255.76	245.68	230.8	241.36	244.96	251.92	259.84	262.72	277.6	260.8	255.28	5145.76	5479.84	5038.72	5513.44	8918.8	9003.76	8928.88	8782.72	8952.88	8816.08	8655.28	8937.76
		TNF-a
			A549				A549+PD1/PD-L1 inhibitor 1				A549+Nivolumab				A549+T cell				A549+T cell+PD1/PD-L1 inhibitor 1				A549+T cell+Nivolumab
			479.125	485.125	449.125	367.75	385.75	382.75	509.125	371.5	512.5	579.25	418.375	607.375	853	821.5	989.5	738.25	1203.25	1128.25	1225.38	1304.88	1307.12	1360.38	1293.62	1347.62
		GranzymeB
			A549				A549+PD1/PD-L1 inhibitor 1				A549+Nivolumab				A549+T cell				A549+T cell+PD1/PD-L1 inhibitor 1				A549+T cell+Nivolumab
			129.167	128.042	120.417	127.167	158.417	159.417	156.667	153.167	163.542	159.667	192.042	179.542	958.667	949.792	995.917	941.667	2423.17	1677.92	1881.79	1759.04	1580.54	1969.42	1418.67	2097.17
		Perforin
			A549				A549+PD1/PD-L1 inhibitor 1				A549+Nivolumab				A549+T cell				A549+T cell+PD1/PD-L1 inhibitor 1				A549+T cell+Nivolumab
			505.143	560	607.143	597.714	626	632.857	608	645.714	635.429	594.286	630.286	512.857	6775.14	7528.57	7698.29	7331.43	13310.9	13664.9	12518	12011.4	12002	11310.3	10895.4	10172
Figure2 D
	A375	IFN-r	A375				A375+PD1/PD-L1 inhibitor1				A375+Nivolumab				A375+T cell				A375+T cell+PD1/PD-L1 inhibitor				A375+T cell+Nivolumab
			345.947	327	301.737	295.737	296.684	490.895	378.158	388.579	365.526	363.316	373.421	331.105	4779.63	5204.37	4191.95	4821.32	8357.21	8225.84	8350.26	6844.26	7082.05	7129.1	6849.95	5686.58
		TNF-a	A375				A375+PD1/PD-L1 inhibitor1				A375+Nivolumab				A375+T cell				A375+T cell+PD1/PD-L1 inhibitor				A375+T cell+Nivolumab
			322.133	309.333	238.4	176.533	163.733	146.667	157.333	388.8	168.533	178.667	430.4	271.467	1253.33	1456.53	998.933	1084.8	1617.6	1860.8	1869.87	1547.73	2021.33	2246.4	1851.2	1942.93
		GranzymeB	A375				A375+PD1/PD-L1 inhibitor1				A375+Nivolumab				A375+T cell				A375+T cell+PD1/PD-L1 inhibitor				A375+T cell+Nivolumab
			383.929	474.5	455.357	681.929	471.357	387.929	523.929	693.929	785.929	247.929	553.071	711.357	1895.64	2150.5	1675.64	1985.36	2691.93	2666.21	2524.21	2507.64	3098.79	3048.5	2381.07	2448.21
		Perforin	A375				A375+PD1/PD-L1 inhibitor1				A375+Nivolumab				A375+T cell				A375+T cell+PD1/PD-L1 inhibitor				A375+T cell+Nivolumab
			765	473.8	795.4	699.4	528.2	734.6	494.6	766.6	792.2	841.8	1144.2	1089.8	2638.6	3069	3117	1971.4	4926.6	4805	5483.4	5189	4712.2	4955.4	4733	4931.4
	SK-MEL-2	IFN-r	SK-MEL-2				SK-MEL-2+PD1/PD-L1 inhibitor1				SK-MEL-2+Nivolumab				SK-MEL-2+T cell				SK-MEL-2+T cell+PD1/PD-L1 inhibitor 1				SK-MEL-2+T cell+Nivolumab
			409.821	294.75	292.607	359.036	353.893	353.25	352.821	550.179	413.036	360.964	435.964	363.107	4322.89	4299.54	4545.96	4400.46	7690.61	7551.32	7530.32	7245.11	3536.46	3633.32	3468.54	3368.68
		TNF-a	SK-MEL-2				SK-MEL-2+PD1/PD-L1 inhibitor1				SK-MEL-2+Nivolumab				SK-MEL-2+T cell				SK-MEL-2+T cell+PD1/PD-L1 inhibitor 1				SK-MEL-2+T cell+Nivolumab
			1273.5	881.5	726.5	806.5	1694.5	2299.5	600.5	1986.5	1322.5	1591.5	573.5	1851.5	4752.5	4030.5	5753.5	2997.5	5512.5	4685.5	7053.5	6013.5	2707.5	1794.5	2673.5	3991.5
		GranzymeB	SK-MEL-2				SK-MEL-2+PD1/PD-L1 inhibitor1				SK-MEL-2+Nivolumab				SK-MEL-2+T cell				SK-MEL-2+T cell+PD1/PD-L1 inhibitor 1				SK-MEL-2+T cell+Nivolumab
			160.5	155.206	153.618	144.794	198.441	157.853	162.441	163.677	231.441	247.853	184.853	155.206	2199.62	1471.85	1418.56	1490.38	1988.91	2218.68	2026.15	2190.97	2166.97	1904.38	2077.32	2475.09
		Perforin	SK-MEL-2				SK-MEL-2+PD1/PD-L1 inhibitor1				SK-MEL-2+Nivolumab				SK-MEL-2+T cell				SK-MEL-2+T cell+PD1/PD-L1 inhibitor 1				SK-MEL-2+T cell+Nivolumab
			660.571	718	539.714	651.143	526.857	524.286	596.286	644.286	555.143	511.429	424.857	466.857	2068.86	2349.14	2397.14	2553.14	4117.43	4144.86	3759.14	4182.57	2188	2776.86	2202.57	2617.43
Figure2 E
		TCR3				TCR3+PD1/PD-L1 inhibitor 1				TCR3+Nivolumab				TP37				TP37+PD1/PD-L1 inhibitor 1				TP37+Nvolumab
		13.8	13.7	13.9	14.1	13.7	12.8	12.5	13.7	14.4	14.1	14.7	14.6	11.6	8.87	10.3	10.2	24.9	21.2	23.3	24.8	21.8	17.3	21	22.8

## Sheet: Figure3
Figure3 B		NP3				NP3+TP37				NP3+TP37+PD1/PD-L1 inhibiotr 1				NP3+TP37+Nivolumab
		5617	4934	5474	5002	3847	4336	4258	3840	4664	5044	4318	5073	5216	4851	4581	5065
Figure3 C		NP3				NP3+TCR3				NP3+TCR3+PD1/PD-L1 inhibiotr 1				NP3+TP37+Nivolumab
		5617	4934	5474	5002	5763	6574	4967	5815	6121	5641	6073	6041	5478	6229	5431	5889
Figure3 D		0μM				1μM				2μM				4μM				8μM				16μM
		1501	1422	1381	1426	1424	1438	1378	1385	1568	1258	1375	1584	1420	1465	1441	1382	1560	1379	1487	1473	1362	1207	1500	1360

## Sheet: Figure4
Figure4 A		Vehicle												4mg/kg												8mg/kg
	1	52.86	115.21	74.35	90.89	40.15	66.29	63.54	71.8	115.46	165.99	56.62	96.98	112.61	59.21	64.78	92.76	73.29	53.18	74.52	143.41	44.58	68.38	100.1	122.04	87.46	124.36	70.04	51.79	109.75	62.89	67.22	46.09	108.08	89.14	60.24	133.32
	4	178.23	161.72	121.94	301.24	69.28	102.58	113.24	120.43	186.66	371.34	114.56	220.57	288.08	100.53	113.09	164.82	103.82	79.21	80.42	127.86	67.28	85.78	245.5	118.34	152.79	141.44	120.84	72.99	164.18	83.21	77.37	82.44	129.81	89	83.69	163.32
	8	169.61	195.9	157.22	400.89	121.23	179.24	93.9	162.4	245.74	368.62	93.85	223.77	391.54	50.99	58.46	157.11	46.5	91.12	99.45	185.09	94.76	67.73	220.93	100.47	187.9	158.03	113.36	97.71	82.33	47.07	64.64	82.06	181.57	95.56	64.84	121.16
	11	225.26	302.5	97.84	493.2	125.36	283.02	150.18	204.36	212.84	421.34	117.33	238.12	275.56	48.17	38.47	247.01	57.87	139.67	111.87	103.23	127.34	47.54	231.03	58.22	181.6	135.99	136.08	77.93	71.68	59.02	62.56	100.7	146.26	56.62	84.16	102.42
	15	307.62	408.29	86.66	550.32	199.56	355.14	258.89	257.71	195.4	579.59	168.67	240.78	312.53	73.86	9.38	243.81	83.81	176.39	132.21	41.06	145.59	25.97	230.77	72.26	179.15	129.94	109.41	57.18	64.55	104.53	85.72	95.2	141.85	58.58	93.31	91.44
	18	455.06	818.53	179.41	1047.27	281.18	772.34	458.43	403.89	258.99	811.09	339.29	309.73	460.72	181.59	0	284.4	123.88	289.31	206.38	37.91	273.91	56.26	408.64	135.58	282.07	170.09	237.12	128.16	92.17	209.6	146.51	224.58	300.39	112.56	65.39	207.32
	22	570	873.2	350.2	1339.9	435.7	772.2	657.7	721.3	488.4	1249.2	607.6	585.1	692.2	252.4	0	475.4	318.5	358.3	250.4	49	318.7	141	711.5	199	248.5	323.2	367	220	146.1	262.5	215.6	387.4	402.5	182.6	65.57	296.1
	25	1042.1	1033.7	307.3		520.8	767.2	736.4	916.2	721.1	1424.1	771.3	877.7	790.9	297.8	0	508	420.8	538.9	340.2	133.1	534.7	143.8	798.2	313.1	364.2	584	464.7	280.5	211.3	303	264.5	454.4	555.7	219.9	0	404
	29	1318.1	1162.4	628.2		1001.2	1146.7	946.1	969.6	675.3	1152.3	856.5	1018.1	980.9	337.5	0	925.1	627.5	673.1	425.5	197.1	559.9	196.1	1067.5	294.1	453.8	613.9	626.5	268.7	229.5	505	257	616.6	761.6	380.1	0	497.5
Figure4 B
	Vihecle												4mg/kg												8mg/kg
	1.7761	2.2147	0.6596	2.6894	1.1103	1.8144	0.9242	1.3118	0.9073	1.8599	1.5032	1.8217	1.138	1.0136	0	1.722	1.4902	1.5502	1.1813	1.3047	0.6561	1.614	0.7651	0.4339	1.0082	1.3817	0.9157	0.8174	0.8163	1.0953	0.7725	0	1.4158	1.3431	0.5104	1.2426
Figure4 D
	CD8a	Vehicle								4mg/kg								8mg/kg
		1047808	767001	386308	1031746	512726	260958	291123	411624	2499695	3335062	3620171	609423	2583588	384847	331364	902118	2514086	4040609	2696256	2674586	25735.2	5066714	3132694	3555072
	PD-L1	Vehicle								4mg/kg								8mg/kg
		276831	402662	41022.1	317582	84458.8	175114	289680	230416	217349	460620	174609	241070	410173	119362	348093	136865	356110	276831	402662	41022.1	317582	84458.8	175114
	FoxP3	Vehicle								4mg/kg								8mg/kg
		6138361	4366823	2784591	2339857	1180738	1450858	3382041	5174432	2873184	3052900	2521227	2990760	1048749	3307685	3043727	3069994	2233088	2837762	1746243	3261170	3282145	2550166	2009069	2870812

## Sheet: Figure5
Figure5 B
		Vehicle								2mg/kg								4mg/kg
	1	182.26	138.51	125.93	113.66	109.44	74.33	58.47	55.89	178.57	140.63	114.88	107.54	100.17	85.09	72.7	62.75	169.42	148.13	116.5	104.15	103.25	95.45	73.56	46.76
	4	260.85	243.93	194.47	145.53	135.86	96.35	67.86	149.67	202.6	199.41	95.63	159.58	216.83	117.64	103.4	89.49	152.77	243.79	142.17	123.04	105.56	126.69	129.06	71.68
	8	437.79	311.63	208.51	150.72	139.28	119.52	98.47	159.1	215.33	377.47	115.52	163.08	273.82	84.28	115.18	102.86	158.93	308.84	69.7	125.56	39.18	131.22	164.85	73.23
	11	655.51	436.12	220.59	185.1	183.39	148.56	109.98	209.89	285.72	496.71	149.08	194.36	529.74	111.93	126.83	131.12	157.81	458.05	51.26	126.62	95.95	138.05	186.42	99.76
	15	808.36	550.35	376.75	254.94	265.61	156.7	175.33	334.98	294.14	652.12	89.85	217.58	690.3	154.4	165.75	155.44	189.92	450.16	36.5	153.32	121.42	152.55	211.96	102
	18	951.35	737.36	441.31	345.11	341.92	245.79	157.08		389.67	720.95	34.43	220.72	970.76	111.43	210.93	226.34	220.59	543.5	8.5	172.19	161.07	144.62	270.82	118.7
	22	1040.2	858.8	636.6	410.6	453.1	330.2	178.2		462.2	854.1	0	279.3	1141.1	139	267.8	289.3	305.2	636.9	0	233.7	237.5	195.9	369.4	134.4
	25	1400.8	1053.5	784.8	535.8	590.8	337.7	205.3		532.4	988.9	0	380.9	1381.8	197.7	288.5	436	489	764.3	0	310.7	303	199.8	450	190.1
	29	1640.6	1152.9	995.9	563.3	635.7	381.9	230.1		678.7	1136.1	0	471	1566.8	259.1	362.2	587.1	601.1	1056.4	0	336.1	440.9	258.9	583.5	227.5
	33	1953.6	1417.7	1118.5	776.1	723.7	478.5	291.6		1009.8	1441.1	0	629	1720.7	351.3	431.2	626.7	1020.4	1365.4	0	514.6	622.2	298.7	872.7	310.8
Figure5 C
	Vehicle								2mg/kg								4mg/kg
	2.51	1.467	1.161	0.475	0.817		0.552	0.241	0.864	1.593	0	0.695	1.346	0.458	0.592	0.745	0.45	1.104	0	0.474	0.52	0.398	0.86	0.38
Figure5 E	CD8a	Vehicle							2mg/kg							4mg/kg
		3494596	3074926	3647387	3088576	2979978	2602523	2443571	3090496	2444871	2441858	3482893	2986004	2756185	4110226	5654382	5782453	4581163	6756399	5088141	5919669	6139637
	PD-L1	Vehicle							2mg/kg							4mg/kg
		191482	184723	274924	321173	327828	130903	229586	47364.9	109216	236870	176727	24839.5	33715.2	174385	27611.2	101085	101866	62530.8	84040.1	27949.9	64942.2
	FoxP3	Vehicle							2mg/kg							4mg/kg
		4052283	4194360	4925252	8751699	4325829	5832440	4539200	2279667	2238405	2287268	2501745	773482	1251804	1145329	3387036	711211	2134281	3454631	2840267	1520581	2266900
		4052283	4194360	4925252	8751699	4325829	5832440	4539200	2279667	2238405	2287268	2501745	773482	1251804	1145329	3387036	711211	2134281	3454631	2840267	1520581	2266900

## Sheet: Figure6
Figure6 A
	IFN-r	Vehicle								4mg/kg								8mg/kg
		299.2	357.81	873.69	192.55	112.03	1301.24	1347.24	1278.24	1278.24	1233.87	653.34	1065.75	744.3	1378.24	446.25	1438.24	805.06	1578.24	855.72	892.25	1304.24	1278.24	1578.24	1442.24
	TNF-a	Vehicle								4mg/kg								8mg/kg
		784.25	3058.99	5365.26	1045.34	4175.56	1088.5	4229.63	4632.88	7630.67	2037.63	1365.54	1351.32	4229.63	1181.06	9272.33	2204.84	5152.37	4632.88	5905.18	9863.07	5513.15	4756.55	7975.53	5152.37
	IL-1a	Vehicle								4mg/kg								8mg/kg
		813.842	832.357	1841.59	912.733	1329.19	660.497	1177.9	1264.07	1661.55	912.32	979.913	931.6	865.687	930.183	1061.03	975.947	1082.08	1273.99	1645.73	1070	1806.05	969.44	2478.64	1704.7
	IL-1b	Vehicle								4mg/kg								8mg/kg
		66.88	25.39	13.75	16.54	2.44333	34.5467	43.28	29.6633	71.46	95.1267	51.8467	47.3267	20.7767	44.56	38.0133	64.2767	92.7133	57.5067	129.753	51.7167	37.0175	66.9167	74.6967
Figure6 B
	IFN-r	Vehicle							2mg/kg							4mg/kg
		16.97	2.8	21.18	15.04	17.38	10.32	2.72	33.65	15.92	6.81	34.89	29.79	12.79	40.64	12.79	21.98	13.95	36.7	17.24	54.13	57.2
	TNF-a	Vehicle							2mg/kg							4mg/kg
		98.03	19.51	12.71	95.62	54.59	30.91	6.05	155.61	71.11	54.59	153.4	163.51	118.57	77.47	108.01	73.91	88.59	69.05	273.2	200.09	65.66
	IL-1a	Vehicle							2mg/kg							4mg/kg
		15.83	3.27	16.92	2.94	18.07	13.65	2.62	33.11	16.31	6.82	32.89	26.28	13.55	35.72	20.25	15.35	38.03	19.96	57.13	12.48	50.46
	IL-1b	Vehicle							2mg/kg							4mg/kg
		2.25	20.34	1.31	6.71	4.07	7.17	3.91	50.99	19.01	57.74	8.27	3.01	24.43	5.74	42.18	67.25	67.78	59.16	33.57	69.4	66.19
Figure6 C
	Vehicle									4mg/kg									8gm/kg
	8.52	6.13	4.48	4.69	8.67	6.01	6.27	7.8	8.87	9.01	10.3	10.3	7.93	9.79	10.5	7.73	11	11.9	4.19	9.08	10.9	6.25	8.62	11.8	7.91	4.92	8.44
	Vehicle								4mg/kg								8mg/kg
	24.77	20.33	40.9	44.5	41.47	25.57	27.33	51.6	48.3	49.37	45.47	39.23	47.87	59.13	30.43	33.2	28.4	35.77	26.33	26.6	33.3	26.7	26.7	31.83
Figure6 D
	CD3	Vehicle							2mg/kg							4mg/kg
		23.1	21.4	20.5	22.5	21.6	18.3	11.4	26.4	9.76	8.23	7.89	15.1	16.2	19	7.06	11.9	11.2	29.9	13.8	8.34	12.2
	CD8	Vehicle							2mg/kg							4mg/kg
		17.5	20.1	19.6	18.9	20.5	18.8	19.8	18.7	25	24.8	27	21.3	18.1	22.1	23.5	20.8	21.7	21.4	19.2	24.4	22.1
	CD4	Vehicle							2mg/kg							4mg/kg
		74.7	73.9	72.2	75.6	73.6	75.8	67.8	80.1	60.9	67.7	63.5	69.9	76.1	70.1	64.7	72.3	75.2	75.6	73.1	62.2	69
	CD3	Vehicle							2mg/kg							4mg/kg
		2.6	1.34	2.11	3.03	2.51	2.46	2.1	2.47	11.8	6.6	6.41	2.55	4.53	10.5	10.5	4.31	5.02	4.02	15.2	7.22	9.42

## Sheet: Figure7
Figure7 C
	CD8a	Vehicle								2mg/kg								4mg/kg
			2591047	955074	2679575	979250	310040	624782	1380725	4139115	3909387	3203949	3109766	1474089	1870742	2301082	2893224	2745623	4084296	2311364	5447694	4515962	1869305	1718556	2985003
	PD-L1	Vehicle								2mg/kg								4mg/kg
		276736	94150.6	89076.9	155267	390724	79401.9	104700	94331.8	48602.4	16929.3	38342.4	26774.6	18709.4	17576.4	35420.1	63706.2	41704.4	26492.6	78431.9	66446.6	72394.6	40027.1
	FoxP3	Vehicle								2mg/kg								4mg/kg
		3795730	5698851	4651751	6510634	3177289	3824478	3732697	1650988	1304927	1611858	1403682	1678676	1424938	1617886	223386	522688	412843	301568	151020	388611	580090
Figure7 D
	IFN-r	Vehicle							2mg/kg							4mg/kg
		7.71	0.73	18.78	17.51	8.65	7.89	21.98	13.71	40.93	22.8	18.63	55.42	18.49	16.57	15.92	26.56	22.97	22.31	48.23	15.17	53.3
	TNF-a	Vehicle							2mg/kg							4mg/kg
		16.35	0	0	94.04	92.46	40.03	37.71	48.38	105.46	56.49	84.8	18.98	78.91	48.38	93.25	128.83	73.91	117.66	158.95	72.51	135.67
	IL-1a	Vehicle							2mg/kg							4mg/kg
		9.04	1.57	17.68	18.07	6.47	7.25	19.96	17.17	37.76	26.64	16.43	51.63	21.41	16.19	14.77	25.93	21.11	25.23	51.63	14.21	59.94
	IL-1b	Vehicle							2mg/kg							4mg/kg
		6.82	6.71	17.74	19.45	18.8	9.06	24.95	15.75	46.43	22.69	36.51	13.38	6.59	7.77	27.91	14.62	21.73	17.74	37.88	20.12	34.21
Figure7 E
	CD3	Vehicle							2mg/kg							4mg/kg
		18.9	10.6	8.01	7.54	11.2	9.5	14.8	7.71	10.7	19.6	12.2	12.3	5.16	16.6	12.3	15.2	6.42	8.03	15.7	10.4	6.09
	CD4	Vehicle							2mg/kg							4mg/kg
		86.4	79.1	80.4	73.1	74.2	77.3	77.2	63.3	74.5	74.8	73.7	76.5	69.2	77	65.5	73.6	68.4	75.3	74	73.5	64.3
	CD8	Vehicle							2mg/kg							4mg/kg
		8.47	9.28	9.82	9.89	11	10.4	9.49	15.8	13.2	13.6	12.2	12.7	11.5	12.1	17.4	12.9	12.8	14.9	15.6	13.9	21.4
Figure7 F
		Vehicle							2mg/kg							4mg/kg
		0.73	4.38	4.63	6.67	5.97	9.86	8.43	12.3	7.86	11	15.8	13.4	9.59	10.5	8.59	9.24	9.32	7.31	4.6	5.14	13.4
